# Supplementary material
Source: ML conference proceedings conference paper supplement (https://www.ecva.net/papers/eccv_2020/papers_ECCV/html/123630171_ECCV_2020_paper.php)
Supplement: Supplementary file 2 [file 123630171-supp.zip]

| Base Object                                                                                                                                                                 | Retrieval Results                                                                                                                                                                                                                                                                                                                                                                                                                                                                                                                                                                                                                                                                                                                                                                                                                                                                                                                                                                                                                                                                                                                                                                                                                                                                                                                                                                                                                                                                                                                                                                                                                                                                                                                                                                                          |
|-----------------------------------------------------------------------------------------------------------------------------------------------------------------------------|------------------------------------------------------------------------------------------------------------------------------------------------------------------------------------------------------------------------------------------------------------------------------------------------------------------------------------------------------------------------------------------------------------------------------------------------------------------------------------------------------------------------------------------------------------------------------------------------------------------------------------------------------------------------------------------------------------------------------------------------------------------------------------------------------------------------------------------------------------------------------------------------------------------------------------------------------------------------------------------------------------------------------------------------------------------------------------------------------------------------------------------------------------------------------------------------------------------------------------------------------------------------------------------------------------------------------------------------------------------------------------------------------------------------------------------------------------------------------------------------------------------------------------------------------------------------------------------------------------------------------------------------------------------------------------------------------------------------------------------------------------------------------------------------------------|
| <div data-bbox="52 323 430 576"> 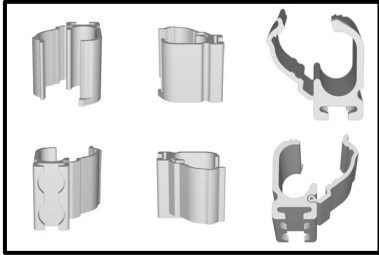 </div> <div data-bbox="171 592 282 635">Clamp</div>       | <div data-bbox="514 145 892 400">  </div> <div data-bbox="612 411 796 454">[1]: Clamp</div> <div data-bbox="957 145 1335 400">  </div> <div data-bbox="1063 411 1247 454">[2]: Clamp</div> <div data-bbox="1398 145 1776 400">  </div> <div data-bbox="1499 411 1683 454">[3]: Clamp</div> <div data-bbox="1829 145 2207 400">  </div> <div data-bbox="1930 411 2114 454">[4]: Clamp</div> <div data-bbox="2283 264 2396 288" data-cs="3" data-kind="parent">...</div> <div data-kind="ghost"></div> <div data-kind="ghost"></div> <div data-bbox="551 576 665 600" data-cs="3" data-kind="parent">...</div> <div data-kind="ghost"></div> <div data-kind="ghost"></div> <div data-bbox="713 488 1091 743">  </div> <div data-bbox="786 754 1013 798">[N-3]: Clamp</div> <div data-bbox="1154 488 1532 743">  </div> <div data-bbox="1224 754 1476 798">[N-2]: Bearing</div> <div data-bbox="1595 488 1973 743">  </div> <div data-bbox="1665 754 1917 798">[N-1]: Bushing</div> <div data-bbox="2031 488 2409 743">  </div> <div data-bbox="2124 754 2338 798">[N]: Bearing</div>                                     |
| <div data-bbox="42 1037 420 1289">  </div> <div data-bbox="161 1305 262 1348">Rotor</div> | <div data-bbox="514 857 892 1112">  </div> <div data-bbox="627 1123 796 1166">[1]: Rotor</div> <div data-bbox="957 857 1335 1112">  </div> <div data-bbox="1060 1123 1229 1166">[2]: Rotor</div> <div data-bbox="1398 857 1776 1112">  </div> <div data-bbox="1506 1123 1675 1166">[3]: Rotor</div> <div data-bbox="1829 857 2207 1112">  </div> <div data-bbox="1942 1123 2111 1166">[4]: Rotor</div> <div data-bbox="2283 967 2396 991" data-cs="3" data-kind="parent">...</div> <div data-kind="ghost"></div> <div data-kind="ghost"></div> <div data-bbox="551 1310 665 1334" data-cs="3" data-kind="parent">...</div> <div data-kind="ghost"></div> <div data-kind="ghost"></div> <div data-bbox="725 1198 1103 1453">  </div> <div data-bbox="808 1481 1023 1524">[N-3]: Rotor</div> <div data-bbox="1161 1198 1539 1453">  </div> <div data-bbox="1234 1481 1449 1524">[N-2]: Rotor</div> <div data-bbox="1590 1198 1968 1453">  </div> <div data-bbox="1665 1481 1892 1524">[N-1]: Pulley</div> <div data-bbox="2031 1198 2409 1453">  </div> <div data-bbox="2152 1481 2320 1524">[N]: Gear</div> |
