# Supplementary material
Source: ML conference proceedings conference paper supplement (https://www.ecva.net/papers/eccv_2020/papers_ECCV/html/123630171_ECCV_2020_paper.php)
Supplement: Supplementary file 9 [file 123630171-supp.zip]

# Appendix of A Large-scale Annotated Mechanical Components Benchmark for Classification and Retrieval Tasks with Deep Neural Networks

Sangpil Kim<sup>\*1</sup>, Hyung-gun Chi<sup>\*1</sup>, Xiao Hu<sup>1</sup>, Qixing Huang<sup>2</sup>, and Karthik Ramani<sup>1</sup>

<sup>1</sup> Purdue University

<sup>2</sup> The University of Texas at Austin

{kim2030, chi45, hu440, ramani}@purdue.edu

huangqx@cs.utexas.edu

## 1 Statistics of dataset B

Dataset B is aggregated 3D mechanical components from 3D Warehouse<sup>\*\*\*</sup> and GrabCAD<sup>†</sup>. The labels of dataset B do not follow the hierarchical taxonomy of MCB dataset. When creating the dataset A, we re-annotated and re-arranged each class of dataset B to merge with the data from TraceParts<sup>‡</sup>, based on International Classification for Standards (ICS [1]). dataset B has total number of 18,038 models with 25 classes. A detailed statistics of the dataset is listed in Table 1.

**Table 1.** The statistics of dataset B.

| Class       | # Models | Class        | # Models      |
|-------------|----------|--------------|---------------|
| Bearings    | 1,117    | Nuts         | 1,069         |
| Bushes      | 592      | Pins         | 2,659         |
| Castors     | 1,109    | Plates       | 366           |
| Clamps      | 157      | Pullies      | 312           |
| Discs       | 109      | Rings        | 551           |
| Fittings    | 1,756    | Rivets       | 51            |
| Flanges     | 398      | Rotors       | 470           |
| Fork joints | 47       | Screws       | 3,661         |
| Gears       | 515      | Springs      | 348           |
| Handles     | 1,751    | Studs        | 352           |
| Hinges      | 61       | Switches     | 177           |
| Hooks       | 122      | Washers      | 880           |
| Motors      | 746      | <b>Total</b> | <b>18,038</b> |

---

<sup>\*</sup> These authors made an equal contribution.

<sup>\*\*\*</sup> <https://3dwarehouse.sketchup.com/>

<sup>†</sup> <https://grabcad.com/>

<sup>‡</sup> <https://www.traceparts.com/>

## 2 Experiments on only aligned data

We built Dataset C as aggregated data from only TraceParts which are all aligned. Then, we benchmarked classification and retrieval tasks with seven networks.

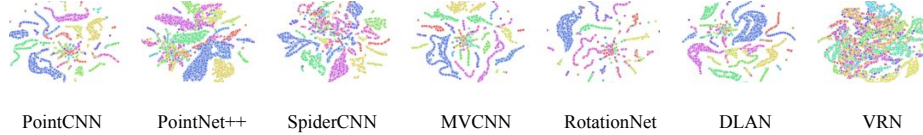

**Fig. 1.** T-SNE [6] plots of seven different deep neural networks trained with Dataset C. We set perplexity as 40 and iterate 300 times.

### 2.1 Retrieval benchmark

**Table 2.** Summary table of evaluation metrics of shape retrieval benchmark for seven deep learning methods. They are grouped by their representation types. Each \*, †, and  $\boxtimes$  symbol indicates the method point cloud, volumetric, and image, respectively.

| Method                      | micro        |              |              |              |              | macro        |              |              |              |              |
|-----------------------------|--------------|--------------|--------------|--------------|--------------|--------------|--------------|--------------|--------------|--------------|
|                             | P@N          | R@N          | F1@N         | mAP          | NDCG@N       | P@N          | R@N          | F1@N         | mAP          | DCG@N        |
| PointCNN* [5]               | 0.912        | 0.912        | 0.689        | 0.901        | 0.923        | 0.860        | 0.802        | 0.826        | 0.880        | 0.845        |
| PointNet++* [7]             | 0.870        | 0.870        | 0.666        | 0.872        | 0.862        | 0.834        | 0.773        | 0.796        | 0.862        | 0.817        |
| SpiderCNN* [9]              | 0.908        | 0.908        | 0.703        | 0.922        | 0.881        | 0.883        | 0.809        | 0.833        | 0.906        | 0.857        |
| MVCNN $\boxtimes$ [8]       | 0.516        | 0.516        | 0.431        | 0.585        | 0.436        | 0.547        | 0.481        | 0.498        | 0.635        | 0.545        |
| RotationNet $\boxtimes$ [4] | 0.756        | 0.756        | 0.63         | 0.836        | 0.618        | 0.813        | 0.701        | 0.722        | 0.851        | 0.760        |
| DLAN† [3]                   | <b>0.952</b> | <b>0.952</b> | <b>0.719</b> | <b>0.941</b> | <b>0.961</b> | <b>0.919</b> | <b>0.866</b> | <b>0.891</b> | <b>0.927</b> | <b>0.903</b> |
| VRN† [2]                    | 0.755        | 0.755        | 0.588        | 0.777        | 0.716        | 0.708        | 0.61         | 0.63         | 0.771        | 0.676        |

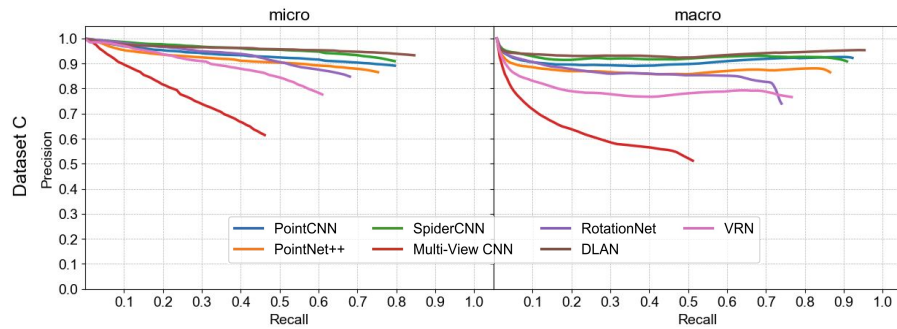

**Fig. 2.** Precision-recall curve plots for retrieval benchmark with seven different methods. The DLAN shows the best retrieval results.

## 2.2 Classification benchmark

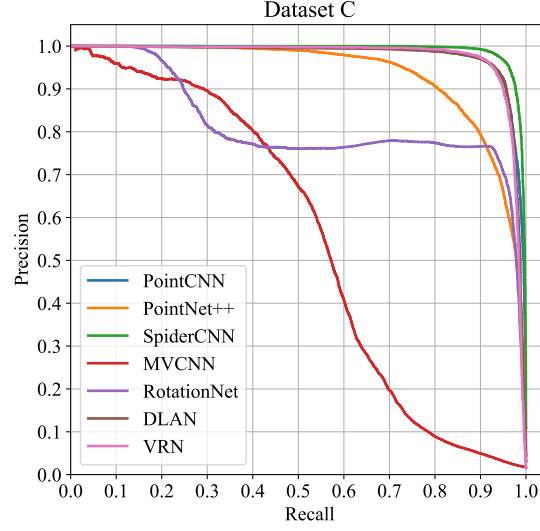

**Fig. 3.** Precision and Recall curve plots of classification task. The RotationNet shows the best performance in terms of accuracy.

**Table 3.** Benchmark results of the seven classification models which were trained and evaluated on our mechanical engineering part benchmark. We trained five times per model and reported the highest result. Each \*, †, and ☒ symbol indicates the method: point cloud, volumetric, and image representation, respectively.

| Method           | Acc. over object (%) | Acc. over class (%) | F1-score | Average Precision |
|------------------|----------------------|---------------------|----------|-------------------|
| PointCNN* [5]    | 93.77                | 71.91               | 74.46    | 83.70             |
| PointNet++* [7]  | 89.97                | 78.82               | 78.48    | 79.45             |
| SpiderCNN* [9]   | 95.68                | 80.97               | 82.12    | 88.78             |
| MVCNN☒ [8]       | 61.29                | 76.71               | 62.20    | 69.38             |
| RotationNet☒ [4] | 96.08                | 82.61               | 84.75    | 80.47             |
| DLAN† [3]        | 93.99                | 83.82               | 83.43    | 87.17             |
| VRN† [2]         | 93.47                | 74.37               | 74.35    | 80.68             |

### 3 Density Distribution of Classification Results

We plot the probability density distribution of classification results of the Dataset A to clarify the inconsistency between PR curve and accuracy. In the Figure 4, 5, positive states the samples of one class, and all other samples are assigned to negative. Density distributions of positive and negative in RotationNet [4](Figure 4) are separated but closer than VRN [2](Figure 5) which explains the dropping of PR curve of classification task. Other networks that show high classification accuracy and a good PR curve have similar density distribution as VRN.

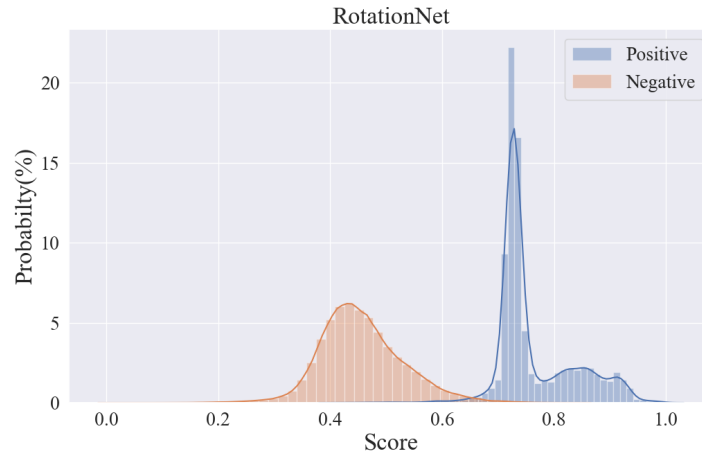

**Fig. 4.** Probability density distribution of classification results of RotationNet.

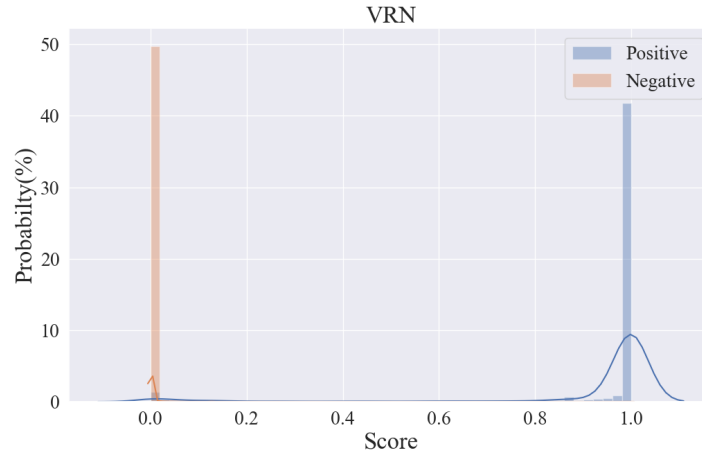

**Fig. 5.** Probability density distribution of classification results from VRN.

#### 4 Detail information of the retrieval benchmark

Figure 7 shows the hierarchical taxonomy of Mechanical Components Benchmark (MCB). We provide confusion matrix plot of seven methods [2–5,7–9] to visualize the details of classification results on Figure 8 and 9. The accuracy of individual class of each method on both datasets A and B are listed in Table 4 and 5. The representative mechanical objects are shown in Figure 10. The retrieval results are depicted in Figure 6.

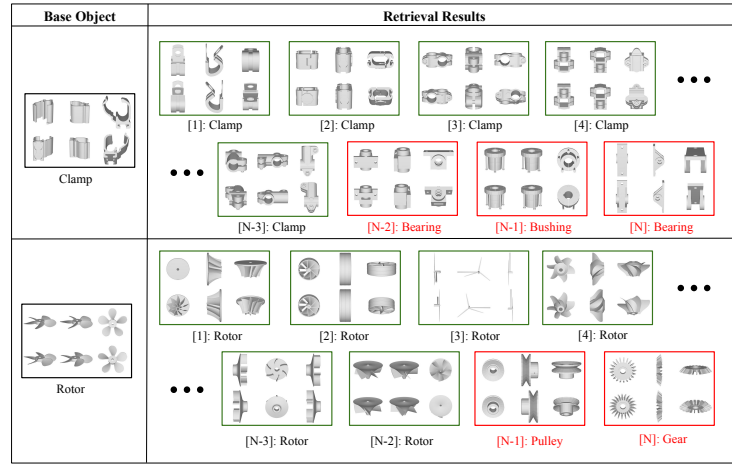

**Fig. 6.** Sample retrieval results of category Clamp and Rotor. N is the number of data in the corresponding class of the query. Within the first N retrievals, green-border images represent the true positive results, and red-border images represent the false positive results.

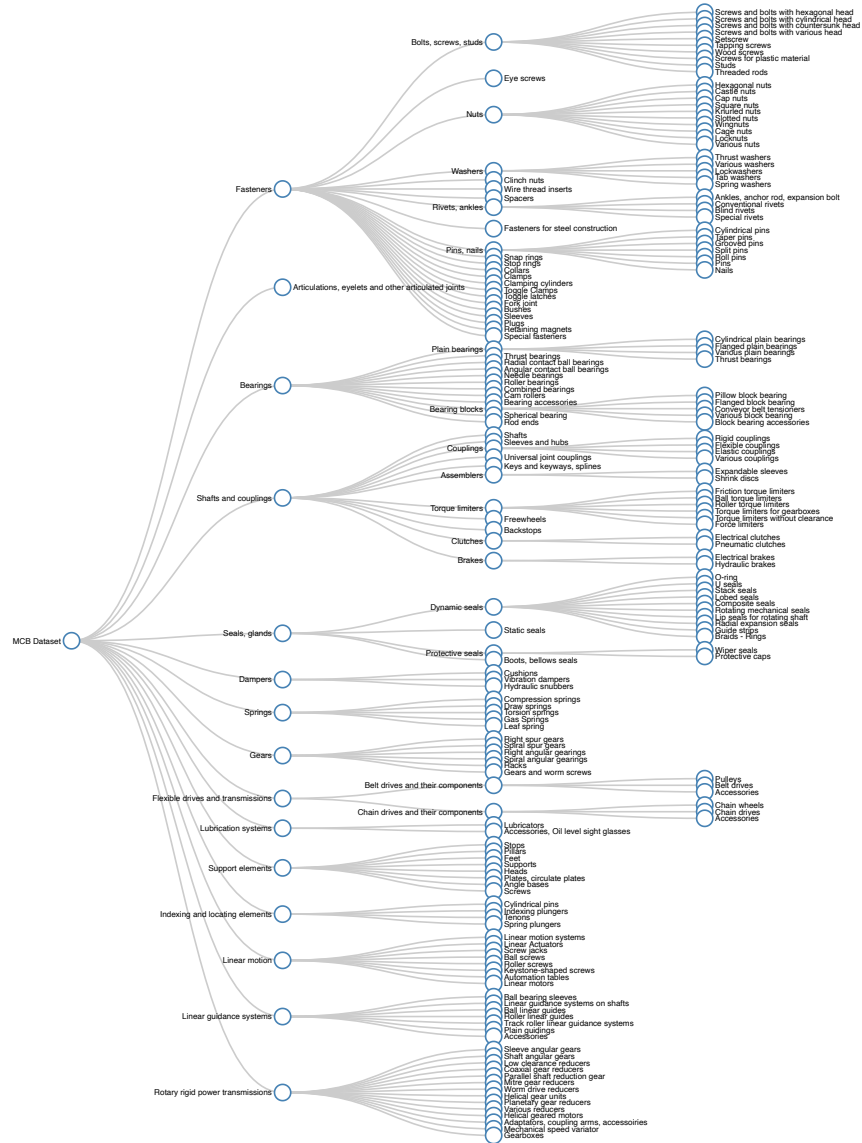

**Fig. 7.** The hierarchy taxonomy of mechanical components which are based on the International Classification for Standards (ICS).

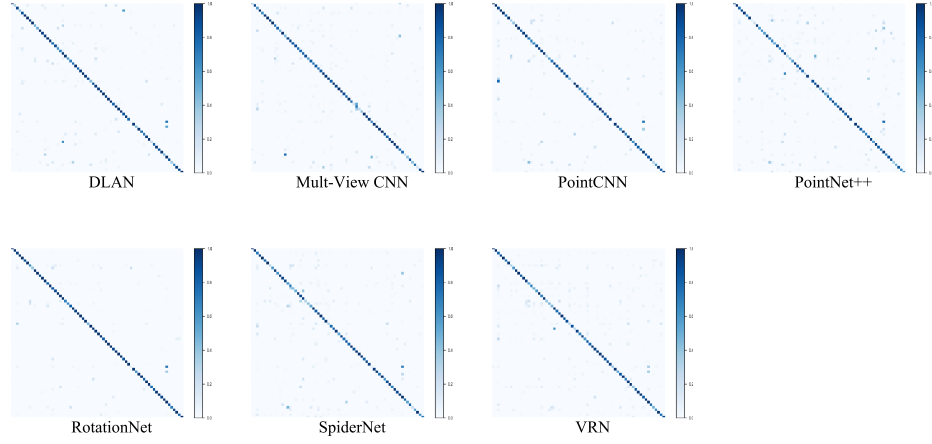

**Fig. 8.** Confusion Matrix of seven different deep neural networks trained with the dataset A.

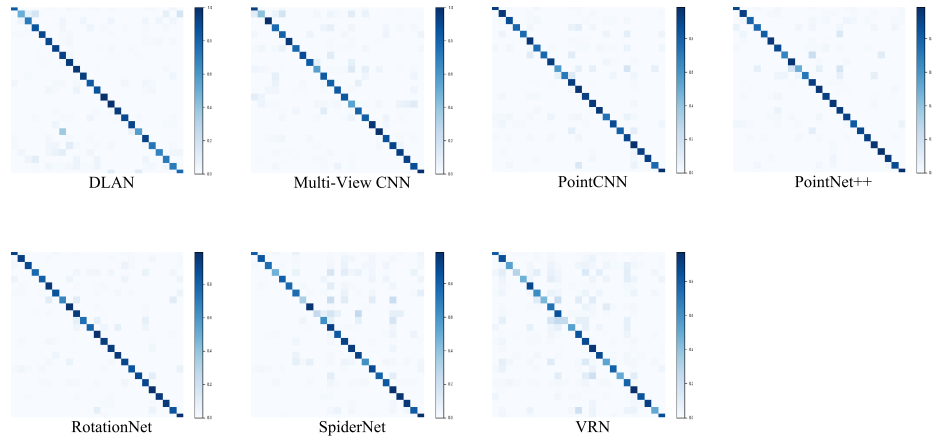

**Fig. 9.** Confusion Matrix of seven different deep neural networks trained with the dataset B.

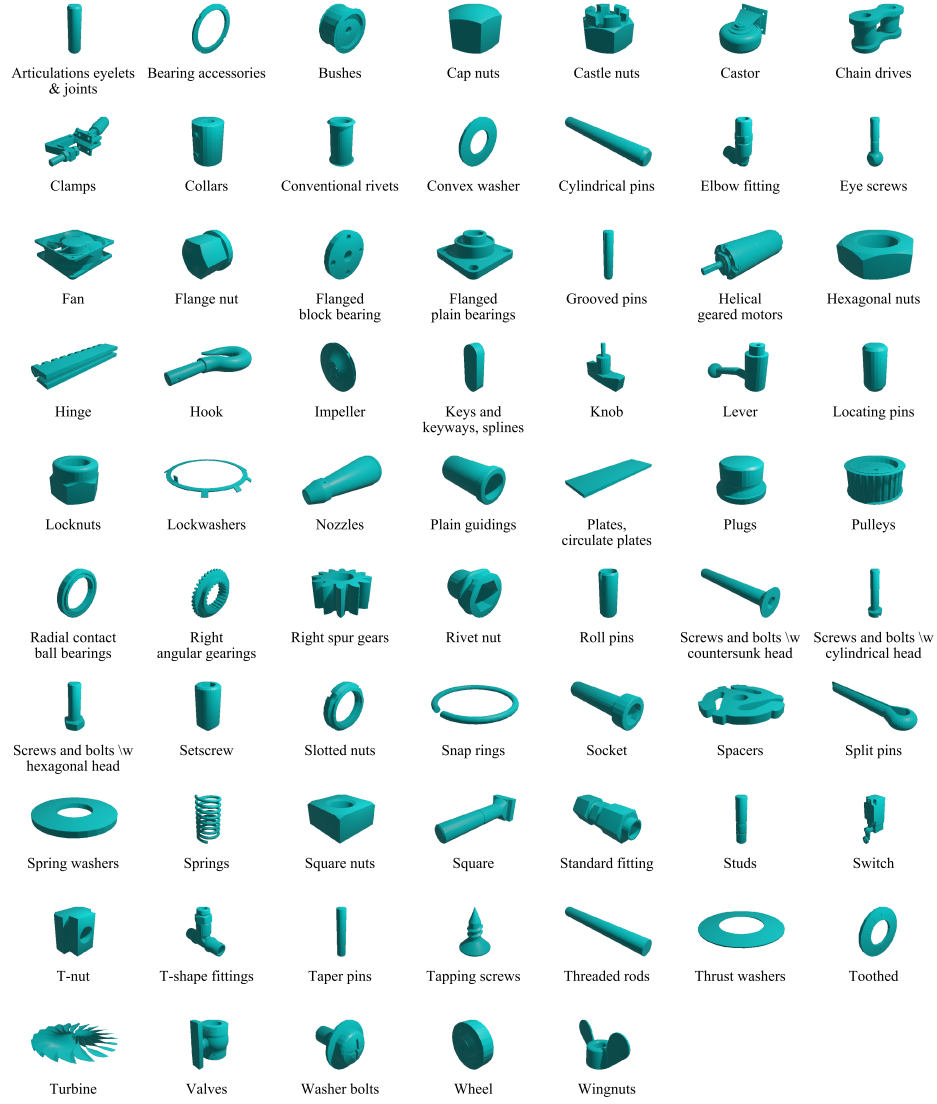

**Fig. 10.** Samples of Mechanical Components Benchmark (MCB) dataset of a total 68 classes.



**Table 4.** Classification results of dataset A for seven different benchmark and 68 classes.

| Class                                  | Point<br>CNN | Point<br>Net++ | Spider<br>Net | Multi-<br>View<br>CNN | Rotation<br>Net | DLAN  | VRN   |
|----------------------------------------|--------------|----------------|---------------|-----------------------|-----------------|-------|-------|
| Articulations eyelets & joints         | 0.988        | 0.880          | 1.000         | 0.452                 | 1.000           | 0.964 | 0.997 |
| Bearing accessories                    | 1.000        | 1.000          | 1.000         | 0.917                 | 1.000           | 0.333 | 1.000 |
| Bushes                                 | 0.914        | 0.776          | 0.722         | 0.580                 | 0.947           | 0.929 | 0.789 |
| Cap nuts                               | 0.978        | 0.911          | 0.933         | 1.000                 | 1.000           | 0.429 | 0.911 |
| Castle nuts                            | 1.000        | 1.000          | 1.000         | 0.618                 | 1.000           | 0.862 | 1.000 |
| Castor                                 | 0.789        | 0.632          | 0.789         | 0.978                 | 0.895           | 1.000 | 0.737 |
| Chain drives                           | 1.000        | 0.950          | 1.000         | 1.000                 | 1.000           | 1.000 | 0.950 |
| Clamps                                 | 0.355        | 0.097          | 0.290         | 0.947                 | 0.645           | 0.947 | 0.323 |
| Collars                                | 0.400        | 0.200          | 0.600         | 1.000                 | 0.400           | 1.000 | 0.600 |
| Conventional rivets                    | 0.993        | 0.974          | 1.000         | 0.710                 | 0.999           | 0.484 | 0.986 |
| Convex washer                          | 1.000        | 0.556          | 0.611         | 0.800                 | 1.000           | 0.500 | 1.000 |
| Cylindrical pins                       | 0.813        | 0.633          | 0.960         | 0.543                 | 0.908           | 0.993 | 0.863 |
| Elbow fitting                          | 0.961        | 0.566          | 0.920         | 1.000                 | 1.000           | 0.944 | 0.974 |
| Eye screws                             | 0.965        | 0.947          | 0.942         | 0.449                 | 0.987           | 0.953 | 0.960 |
| Fan                                    | 0.738        | 0.667          | 0.619         | 0.921                 | 0.833           | 0.987 | 0.548 |
| Flanged block bearing                  | 0.688        | 0.688          | 0.734         | 0.912                 | 1.000           | 0.969 | 0.700 |
| Flanged plain bearings                 | 0.636        | 0.500          | 0.455         | 0.857                 | 0.875           | 0.762 | 0.488 |
| Flange nut                             | 0.900        | 0.900          | 0.500         | 0.900                 | 0.909           | 0.900 | 0.591 |
| Grooved pins                           | 0.967        | 0.644          | 0.967         | 0.788                 | 0.996           | 0.625 | 1.000 |
| Helical geared motors                  | 0.938        | 0.808          | 0.903         | 0.773                 | 0.986           | 0.682 | 0.699 |
| Hexagonal nuts                         | 0.981        | 0.942          | 0.952         | 0.808                 | 0.986           | 0.966 | 0.971 |
| Hinge                                  | 0.300        | 0.300          | 0.300         | 0.889                 | 0.700           | 0.981 | 0.400 |
| Hook                                   | 0.565        | 0.435          | 0.435         | 0.600                 | 0.652           | 0.600 | 0.478 |
| Impeller                               | 0.724        | 0.552          | 0.536         | 0.826                 | 0.828           | 0.696 | 0.448 |
| Keys and keyways, splines              | 1.000        | 0.991          | 1.000         | 0.750                 | 1.000           | 0.759 | 1.000 |
| Knob                                   | 0.847        | 0.756          | 0.817         | 0.848                 | 0.931           | 1.000 | 0.771 |
| Lever                                  | 0.966        | 0.922          | 0.946         | 0.771                 | 0.990           | 0.824 | 0.888 |
| Locating pins                          | 0.909        | 0.727          | 1.000         | 0.845                 | 1.000           | 0.961 | 1.000 |
| Locknuts                               | 0.860        | 0.280          | 0.840         | 1.000                 | 0.940           | 1.000 | 0.860 |
| Lockwashers                            | 0.895        | 0.953          | 0.977         | 0.960                 | 1.000           | 0.980 | 0.884 |
| Nozzle                                 | 0.467        | 0.067          | 0.333         | 0.953                 | 0.500           | 0.919 | 0.300 |
| Plain guidings                         | 0.111        | 0.889          | 0.778         | 0.833                 | 1.000           | 0.433 | 0.889 |
| Plates, circulate plates               | 0.973        | 0.877          | 0.822         | 1.000                 | 0.986           | 0.889 | 0.288 |
| Plugs                                  | 1.000        | 0.970          | 1.000         | 0.918                 | 0.970           | 0.945 | 0.939 |
| Pulleys                                | 0.583        | 0.458          | 0.542         | 1.000                 | 1.000           | 0.970 | 0.667 |
| Radial contact ball bearings           | 0.967        | 0.967          | 0.954         | 1.000                 | 0.987           | 0.958 | 0.950 |
| Right angular gearings                 | 0.750        | 0.500          | 0.750         | 0.891                 | 0.833           | 0.987 | 0.583 |
| Right spur gears                       | 0.886        | 0.852          | 0.862         | 0.830                 | 1.000           | 0.932 | 0.841 |
| Rivet nut                              | 0.800        | 0.700          | 0.800         | 1.000                 | 1.000           | 1.000 | 0.800 |
| Roll pins                              | 0.997        | 0.975          | 0.997         | 0.799                 | 0.997           | 0.981 | 0.984 |
| Screws and bolts with countersunk head | 0.886        | 0.716          | 0.880         | 0.182                 | 0.908           | 0.804 | 0.941 |
| Screws and bolts with cylindrical head | 0.985        | 0.877          | 0.989         | 0.720                 | 0.995           | 0.995 | 0.970 |
| Screws and bolts with hexagonal head   | 0.999        | 0.984          | 0.990         | 0.266                 | 0.998           | 0.980 | 0.979 |
| Setscrew                               | 0.981        | 0.917          | 0.989         | 0.436                 | 0.992           | 0.992 | 0.985 |
| Slotted nuts                           | 0.800        | 0.800          | 0.800         | 1.000                 | 0.867           | 0.867 | 0.867 |
| Snap rings                             | 0.950        | 0.983          | 0.926         | 0.950                 | 1.000           | 0.992 | 0.909 |
| Socket                                 | 0.953        | 0.924          | 0.930         | 0.959                 | 0.971           | 0.784 | 0.924 |
| Spacers                                | 0.000        | 0.000          | 0.091         | 0.682                 | 0.091           | 0.045 | 0.409 |
| Split pins                             | 0.968        | 0.979          | 0.968         | 1.000                 | 0.979           | 0.979 | 0.979 |
| Springs                                | 0.938        | 0.954          | 0.969         | 1.000                 | 0.636           | 0.455 | 0.545 |
| Spring washers                         | 0.636        | 0.818          | 0.727         | 0.969                 | 1.000           | 0.985 | 0.862 |
| Square                                 | 1.000        | 0.714          | 1.000         | 1.000                 | 1.000           | 0.786 | 1.000 |

|                  |       |       |       |       |       |       |       |
|------------------|-------|-------|-------|-------|-------|-------|-------|
| Square nuts      | 0.700 | 0.700 | 0.600 | 0.900 | 0.800 | 0.700 | 0.700 |
| Standard fitting | 0.947 | 0.875 | 0.887 | 0.803 | 0.993 | 0.954 | 0.967 |
| Studs            | 0.985 | 0.935 | 0.987 | 0.962 | 0.996 | 0.968 | 0.994 |
| Switch           | 0.618 | 0.588 | 0.706 | 0.971 | 0.765 | 0.235 | 0.412 |
| Taper pins       | 0.875 | 0.958 | 0.964 | 1.000 | 0.850 | 0.800 | 0.850 |
| Tapping screws   | 0.823 | 0.826 | 0.906 | 0.940 | 0.970 | 0.970 | 0.970 |
| Threaded rods    | 0.760 | 0.721 | 0.971 | 0.735 | 1.000 | 0.880 | 0.972 |
| Thrust washers   | 0.989 | 0.961 | 0.989 | 0.796 | 0.911 | 0.961 | 0.814 |
| T-nut            | 0.850 | 0.700 | 0.800 | 0.196 | 1.000 | 0.475 | 0.961 |
| Toothed          | 0.889 | 0.889 | 0.556 | 0.416 | 0.996 | 0.996 | 0.994 |
| T-shape fitting  | 0.925 | 0.851 | 0.836 | 0.889 | 0.889 | 0.889 | 0.778 |
| Turbine          | 0.294 | 0.353 | 0.235 | 0.412 | 0.706 | 0.353 | 0.471 |
| Valve            | 0.611 | 0.500 | 0.556 | 0.778 | 0.944 | 0.667 | 0.667 |
| Washer bolt      | 0.978 | 0.852 | 0.989 | 0.159 | 0.989 | 0.951 | 0.989 |
| Wheel            | 0.813 | 0.688 | 0.604 | 0.938 | 0.813 | 0.917 | 0.771 |
| Wingnuts         | 0.900 | 0.600 | 0.700 | 1.000 | 1.000 | 1.000 | 0.900 |
| Bearings         | 0.923 | 0.885 | 0.808 | 0.946 | 0.923 | 0.904 | 0.808 |
| Bushes           | 0.966 | 0.915 | 0.839 | 0.403 | 0.941 | 0.737 | 0.856 |

**Table 5.** Classification results of dataset B for seven different benchmark and 25 classes.

| Class       | Point<br>CNN | Point<br>Net++ | Spider<br>Net | Multi-<br>View<br>CNN | Rotation<br>Net | DLAN  | VRN   |
|-------------|--------------|----------------|---------------|-----------------------|-----------------|-------|-------|
| Castors     | 0.875        | 0.819          | 0.750         | 1.000                 | 0.889           | 0.931 | 0.542 |
| Clamps      | 0.806        | 0.806          | 0.484         | 0.758                 | 0.871           | 0.677 | 0.290 |
| Discs       | 0.762        | 0.762          | 0.810         | 0.810                 | 0.810           | 0.714 | 0.476 |
| Fittings    | 0.963        | 0.957          | 0.778         | 0.967                 | 0.957           | 0.960 | 0.883 |
| Flanges     | 0.747        | 0.911          | 0.769         | 0.785                 | 0.861           | 0.709 | 0.633 |
| Fork joints | 0.667        | 0.667          | 0.333         | 0.889                 | 0.667           | 0.778 | 0.444 |
| Gears       | 0.922        | 0.961          | 0.971         | 0.833                 | 0.990           | 0.902 | 0.725 |
| Handles     | 0.937        | 0.943          | 0.929         | 0.558                 | 0.946           | 0.914 | 0.857 |
| Hinges      | 0.667        | 0.583          | 0.250         | 0.875                 | 0.833           | 0.500 | 0.250 |
| Hooks       | 0.708        | 0.667          | 0.625         | 0.812                 | 0.792           | 0.708 | 0.542 |
| Motors      | 0.973        | 0.973          | 0.839         | 0.859                 | 0.980           | 0.933 | 0.839 |
| Nuts        | 0.930        | 0.925          | 0.916         | 0.850                 | 0.893           | 0.841 | 0.869 |
| Pins        | 0.951        | 0.970          | 0.943         | 0.560                 | 0.955           | 0.930 | 0.945 |
| Plates      | 0.945        | 0.945          | 0.918         | 0.822                 | 0.959           | 0.945 | 0.877 |
| Pullies     | 0.754        | 0.918          | 0.617         | 0.792                 | 0.902           | 0.836 | 0.525 |
| Rings       | 0.900        | 0.827          | 0.890         | 0.987                 | 0.845           | 0.864 | 0.791 |
| Rivets      | 0.800        | 0.900          | 0.800         | 1.000                 | 0.900           | 1.000 | 0.500 |
| Rotors      | 0.892        | 0.935          | 0.839         | 0.889                 | 0.892           | 0.86  | 0.785 |
| Screws      | 0.985        | 0.981          | 0.985         | 0.911                 | 0.992           | 0.996 | 0.971 |
| Springs     | 0.942        | 0.986          | 0.971         | 0.949                 | 0.971           | 0.957 | 0.841 |
| Studs       | 0.929        | 0.943          | 0.957         | 0.943                 | 0.971           | 0.914 | 0.914 |
| Switches    | 0.771        | 0.886          | 0.829         | 0.871                 | 0.914           | 0.571 | 0.514 |
| Washers     | 0.983        | 0.989          | 0.989         | 1.000                 | 0.989           | 0.971 | 0.863 |

## References

1. International Classification for Standards. ISO, 7 edn. (2015)
2. Brock, A., Lim, T., Ritchie, J.M., Weston, N.: Generative and discriminative voxel modeling with convolutional neural networks. arXiv preprint arXiv:1608.04236 (2016)
3. Furuya, T., Ohbuchi, R.: Diffusion-on-manifold aggregation of local features for shape-based 3d model retrieval. In: Proceedings of the 5th ACM on International Conference on Multimedia Retrieval. pp. 171–178. ACM (2015)
4. Kanezaki, A., Matsushita, Y., Nishida, Y.: Rotationnet: Joint object categorization and pose estimation using multiviews from unsupervised viewpoints. In: Proceedings of the IEEE Conference on Computer Vision and Pattern Recognition. pp. 5010–5019 (2018)
5. Li, Y., Bu, R., Sun, M., Wu, W., Di, X., Chen, B.: Pointcnn: Convolution on x-transformed points. In: Advances in Neural Information Processing Systems. pp. 820–830 (2018)
6. Maaten, L.v.d., Hinton, G.: Visualizing data using t-sne. *Journal of machine learning research* **9**(Nov), 2579–2605 (2008)
7. Qi, C.R., Yi, L., Su, H., Guibas, L.J.: Pointnet++: Deep hierarchical feature learning on point sets in a metric space. In: Advances in neural information processing systems. pp. 5099–5108 (2017)
8. Su, J.C., Gadelha, M., Wang, R., Maji, S.: A deeper look at 3d shape classifiers. In: Proceedings of the European Conference on Computer Vision (ECCV). pp. 0–0 (2018)
9. Xu, Y., Fan, T., Xu, M., Zeng, L., Qiao, Y.: Spiderncnn: Deep learning on point sets with parameterized convolutional filters. In: Proceedings of the European Conference on Computer Vision (ECCV). pp. 87–102 (2018)
