# Supplementary material
Source: ML conference proceedings conference paper supplement (https://www.ecva.net/papers/eccv_2020/papers_ECCV/html/123630171_ECCV_2020_paper.php)
Supplement: Supplementary file 18 [file 123630171-supp.zip]

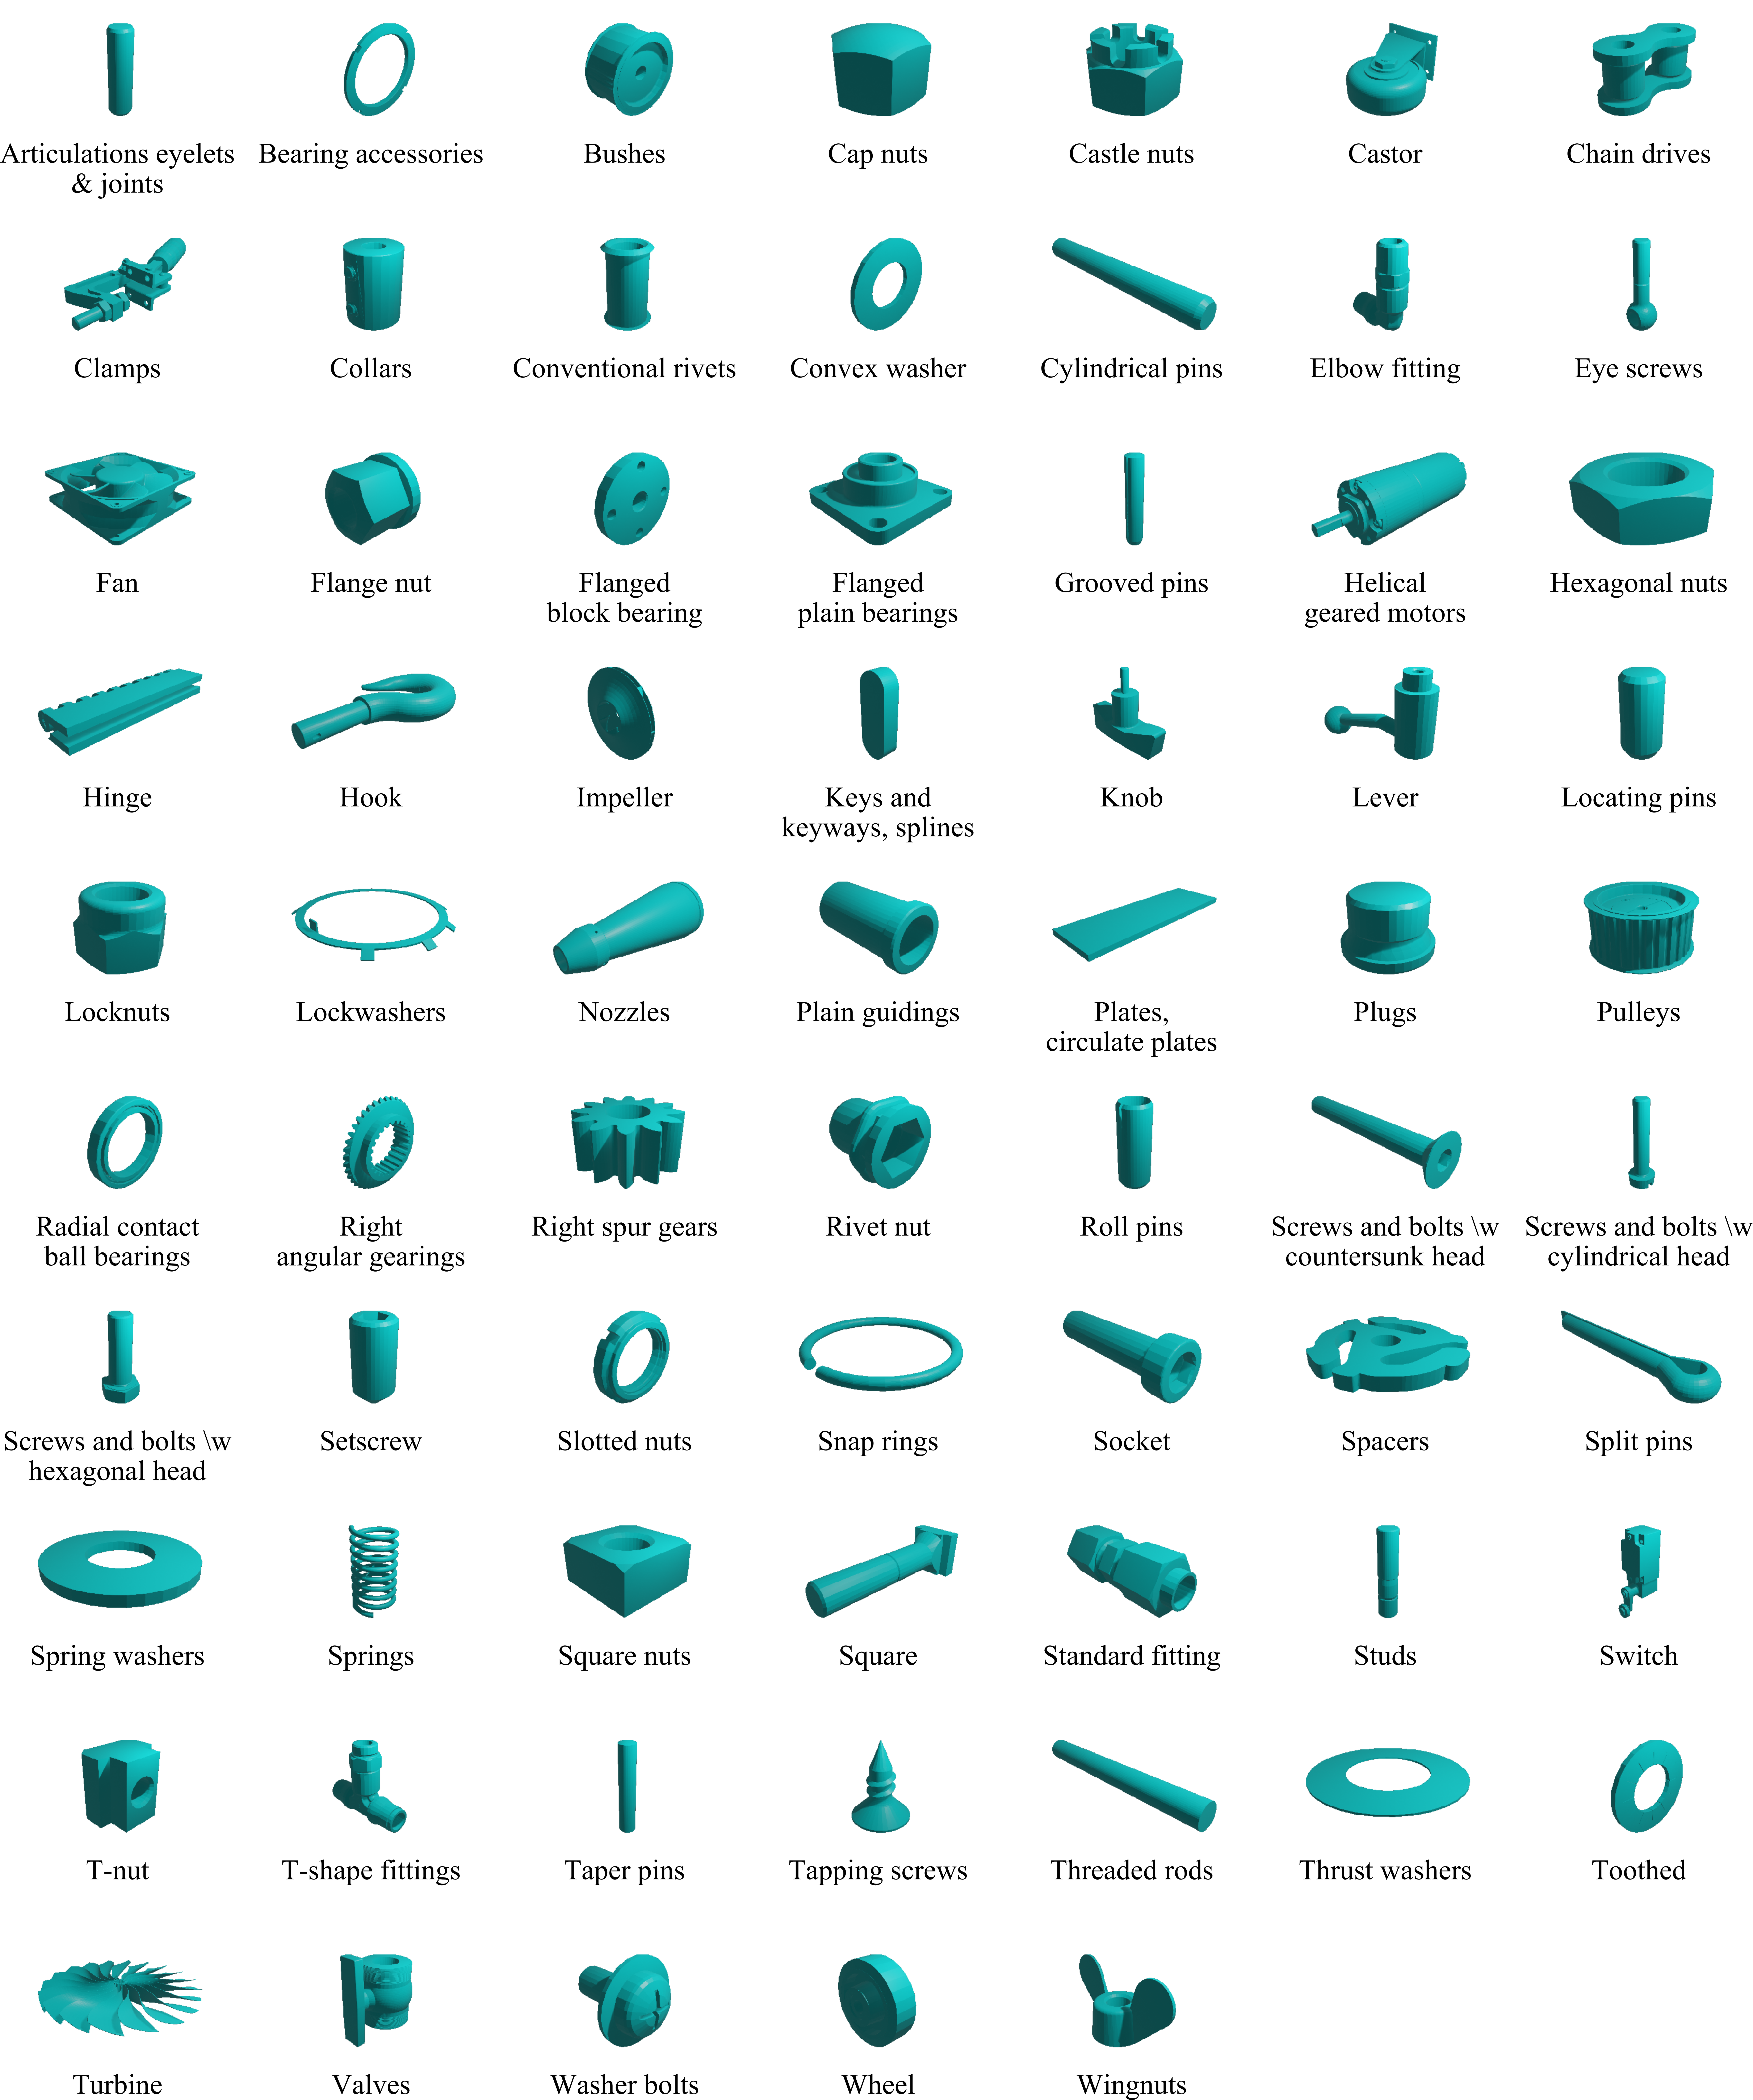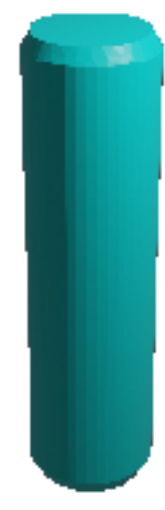

Articulations eyelets  
& joints

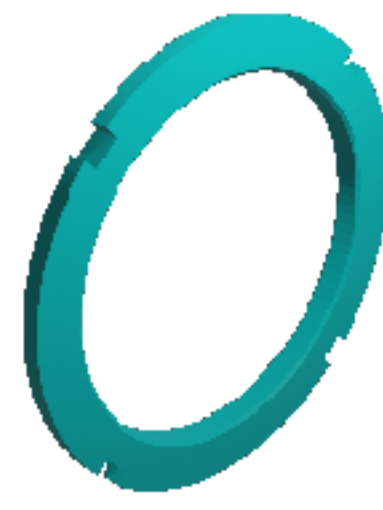

Bearing accessories

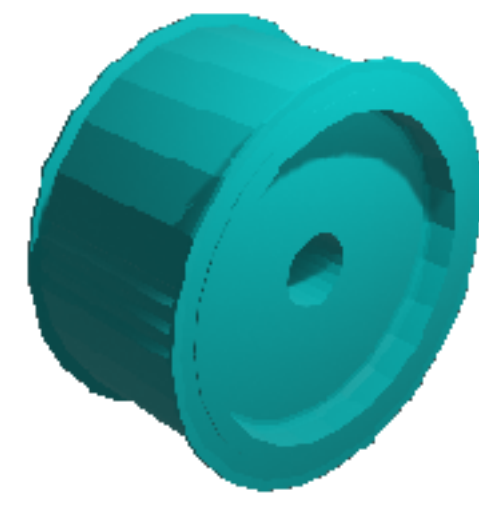

Bushes

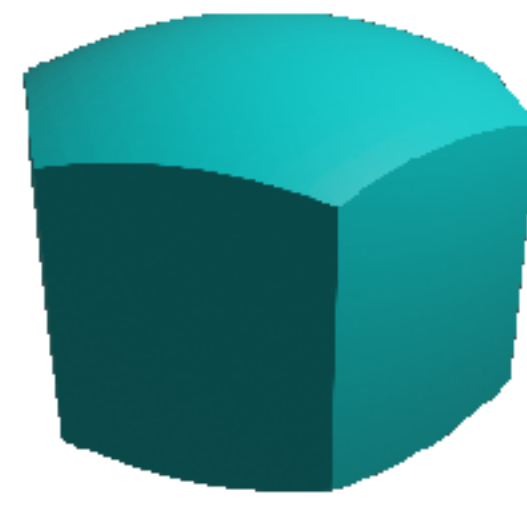

Cap nuts

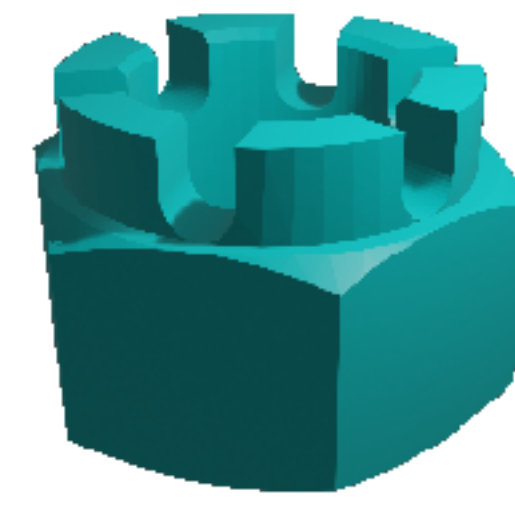

Castle nuts

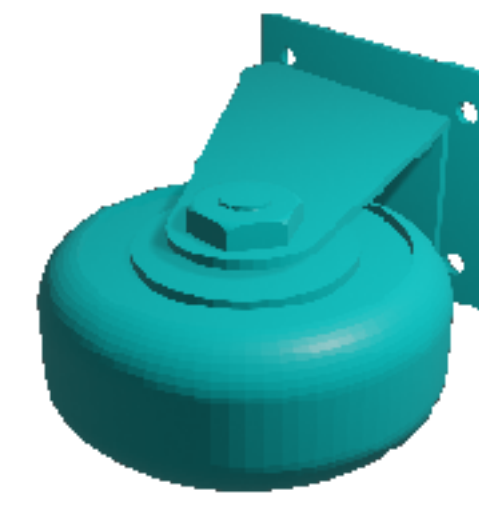

Castor

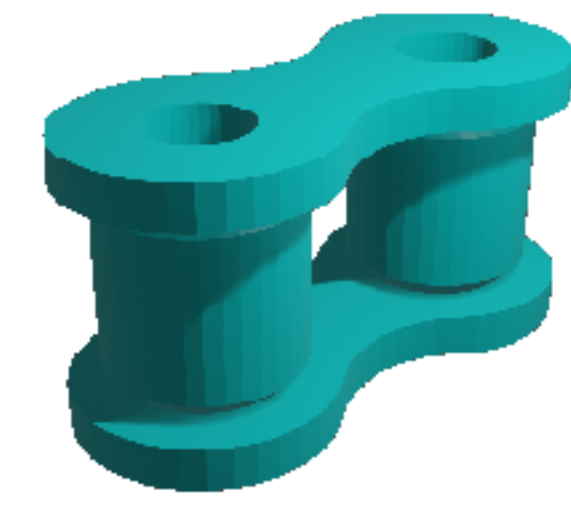

Chain drives

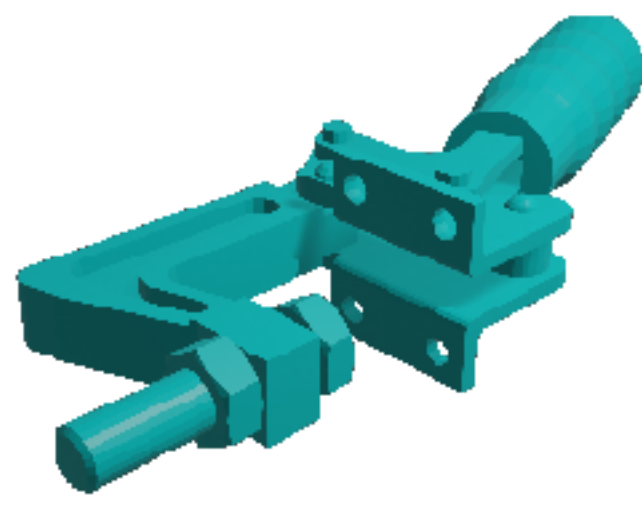

Clamps

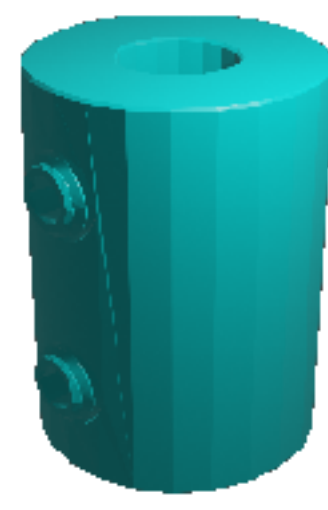

Collars

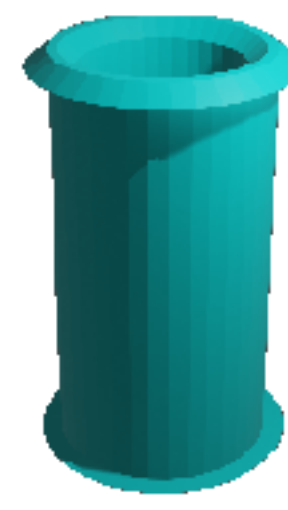

Conventional rivets

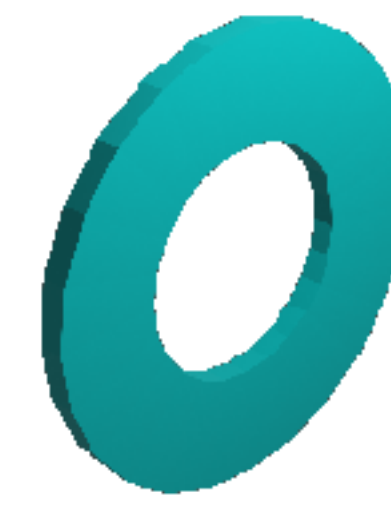

Convex washer

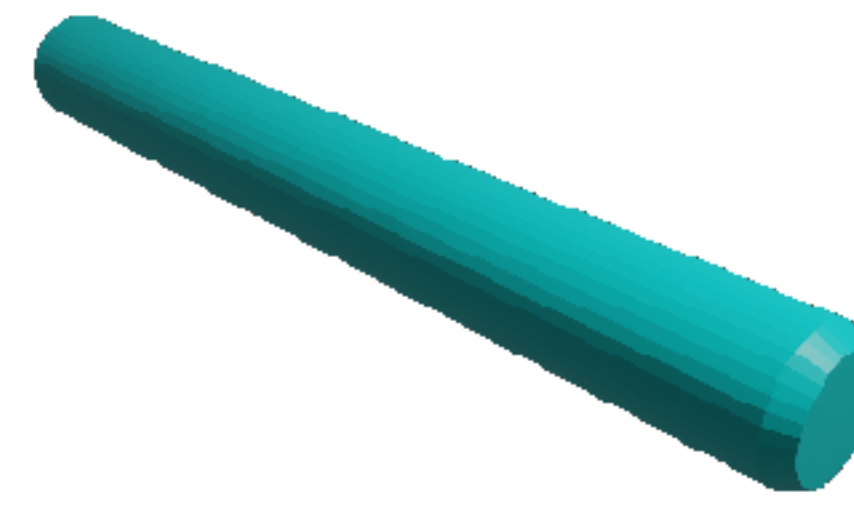

Cylindrical pins

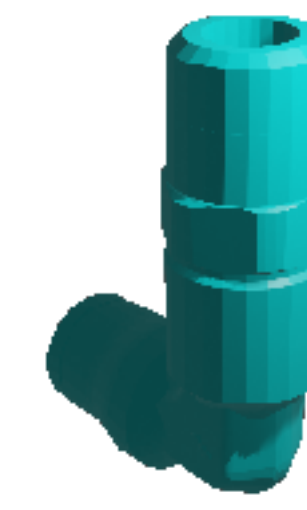

Elbow fitting

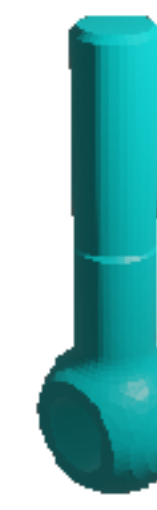

Eye screws

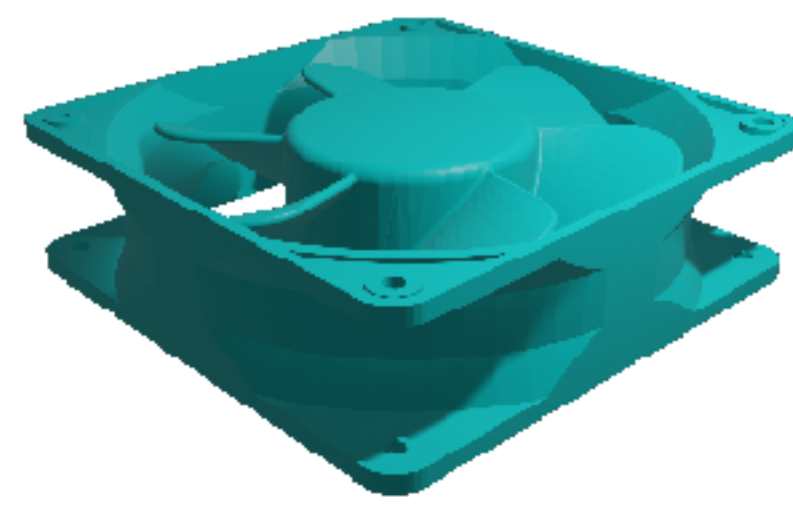

Fan

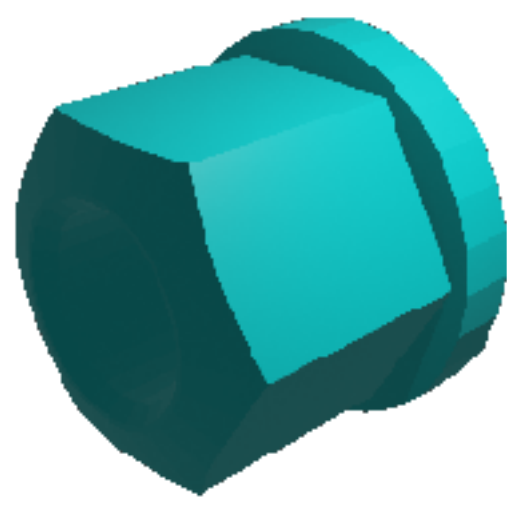

Flange nut

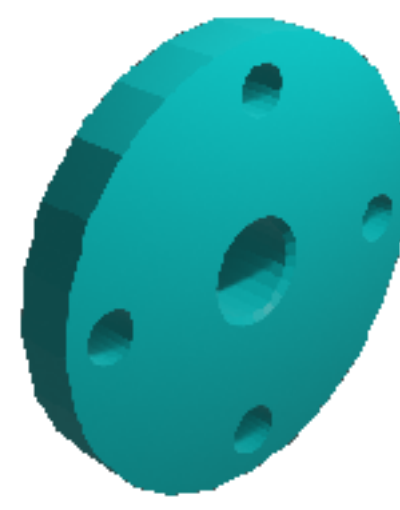

Flanged  
block bearing

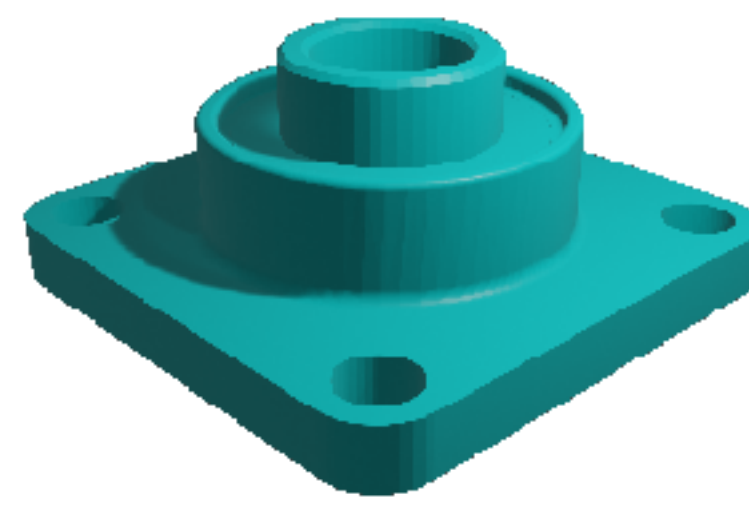

Flanged  
plain bearings

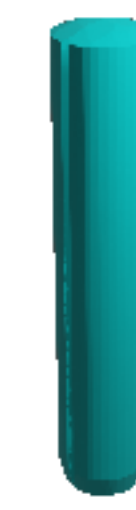

Grooved pins

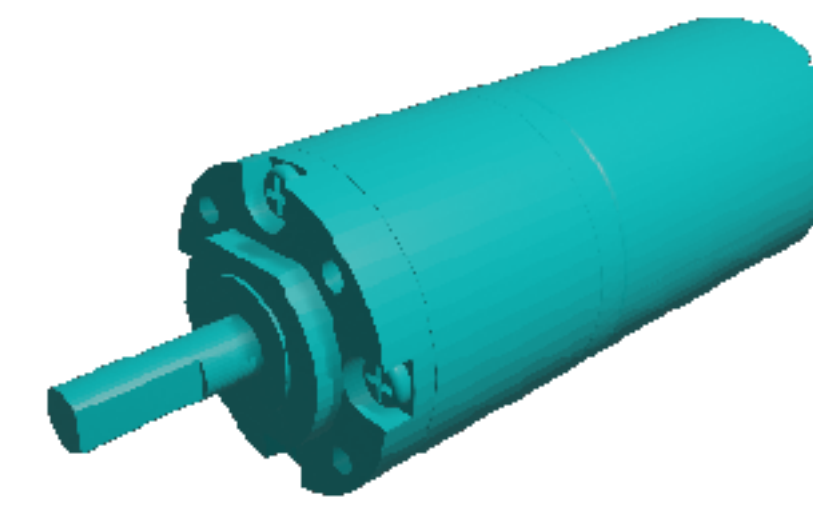

Helical  
geared motors

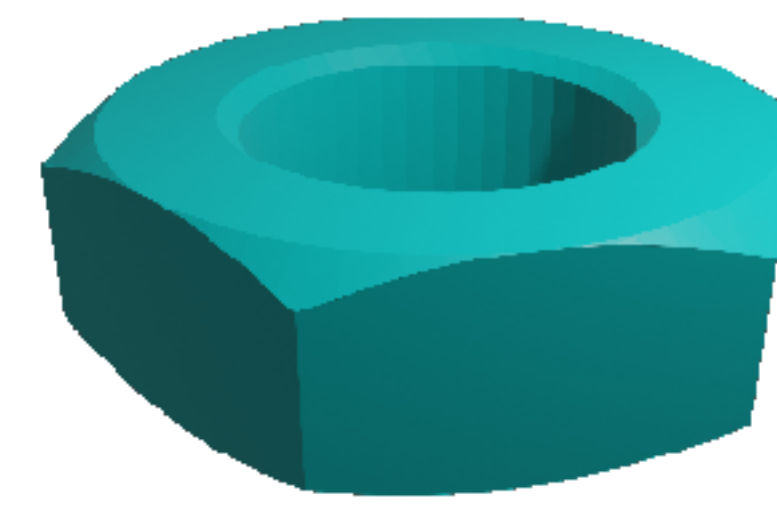

Hexagonal nuts

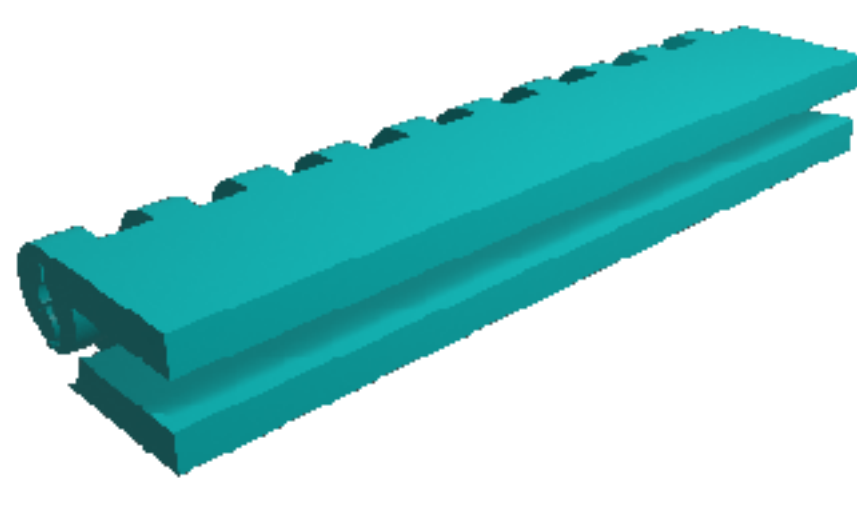

Hinge

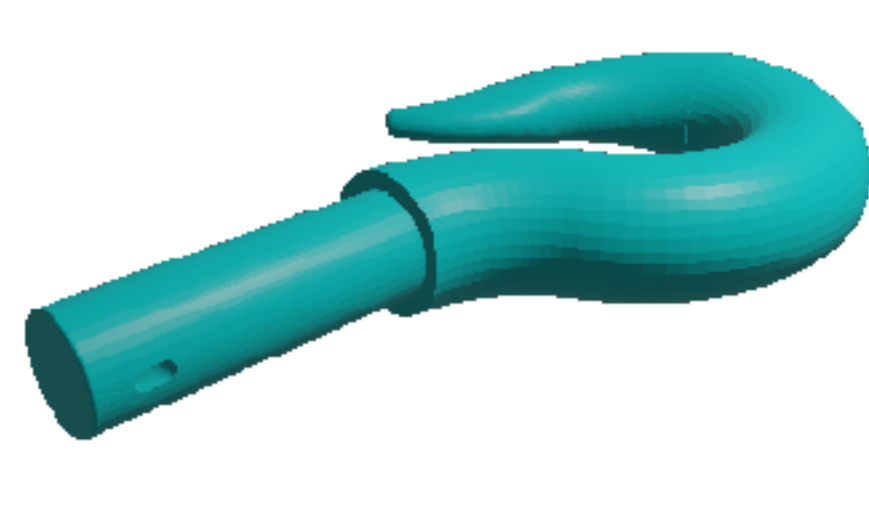

Hook

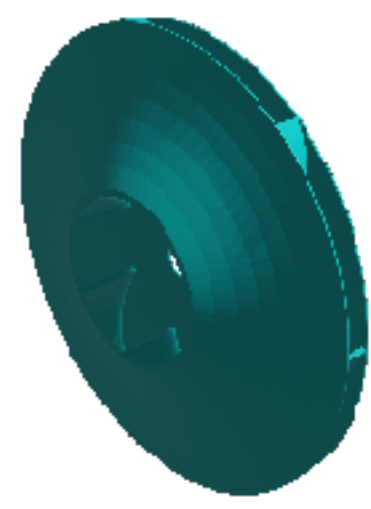

Impeller

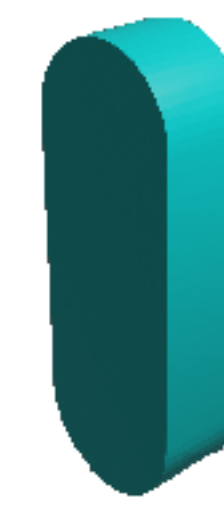

Keys and  
keyways, splines

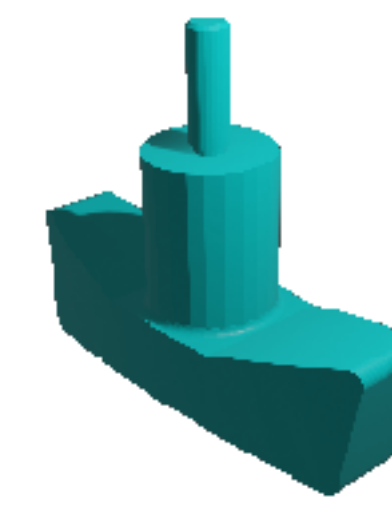

Knob

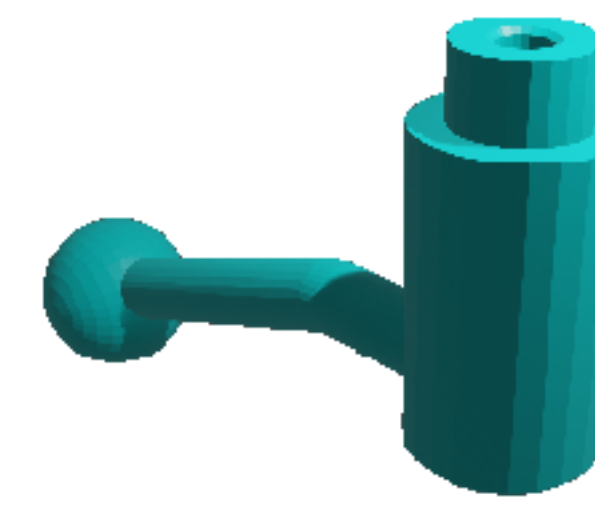

Lever

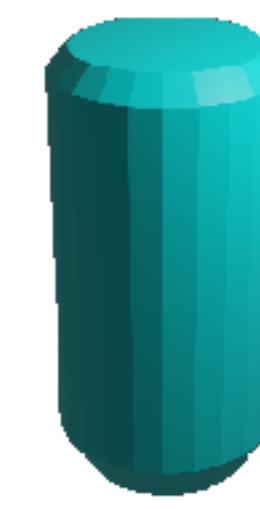

Locating pins

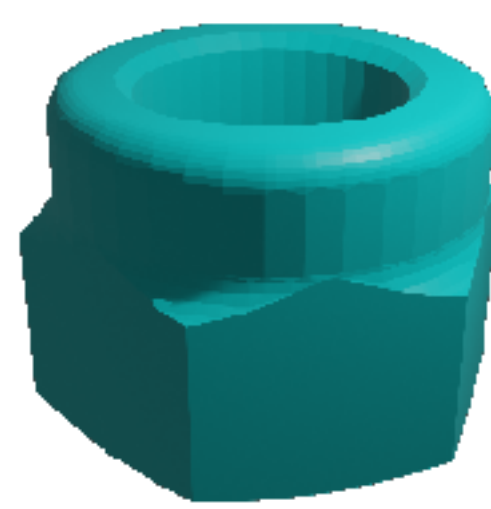

Locknuts

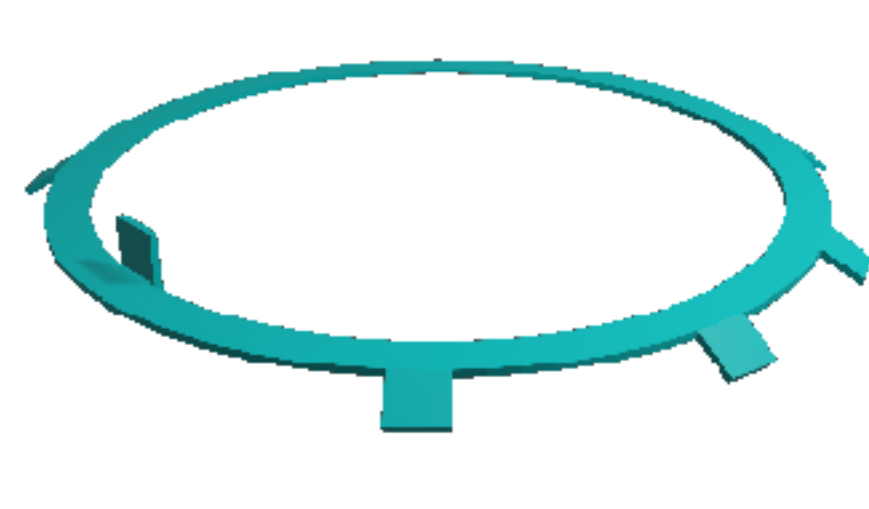

Lockwashers

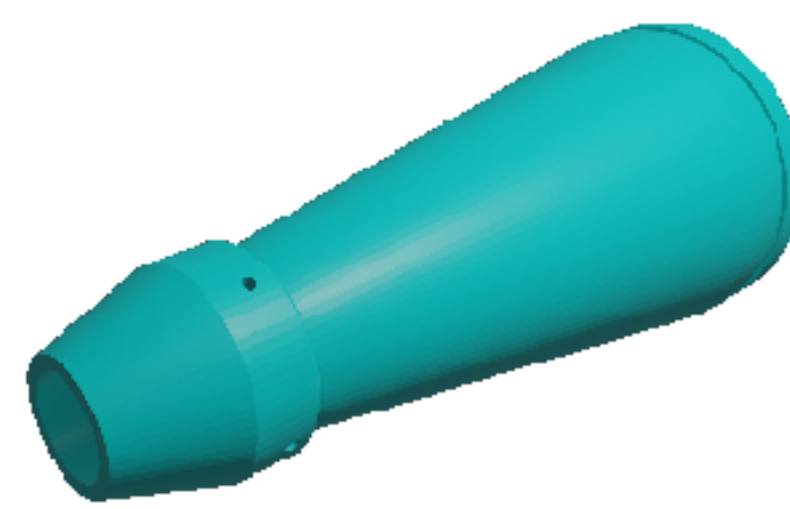

Nozzles

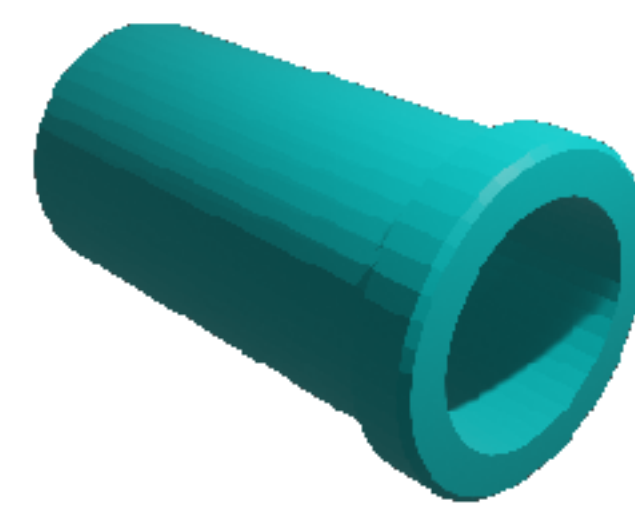

Plain guidings

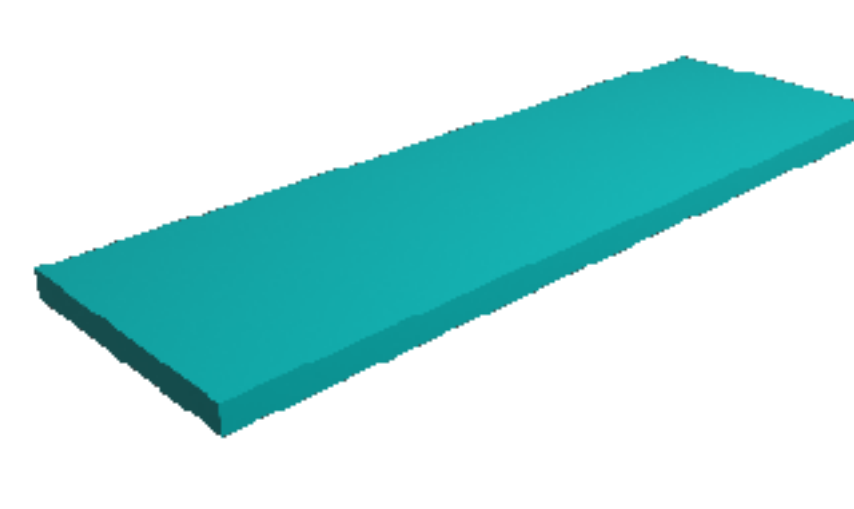

Plates,  
circulate plates

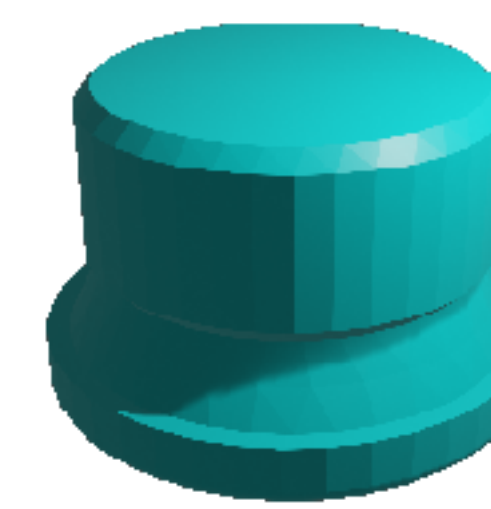

Plugs

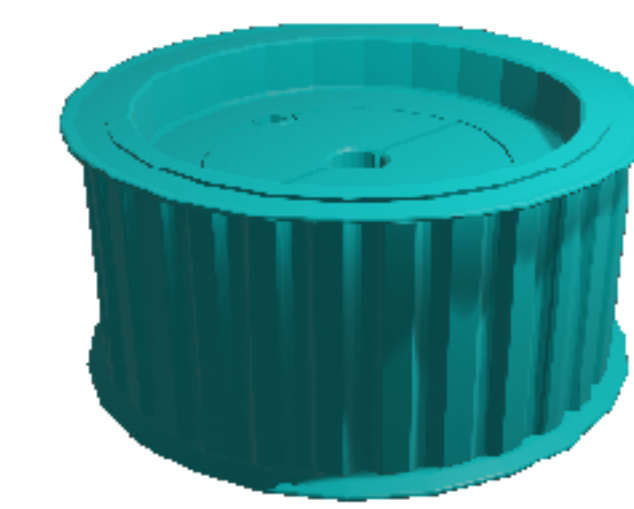

Pulleys

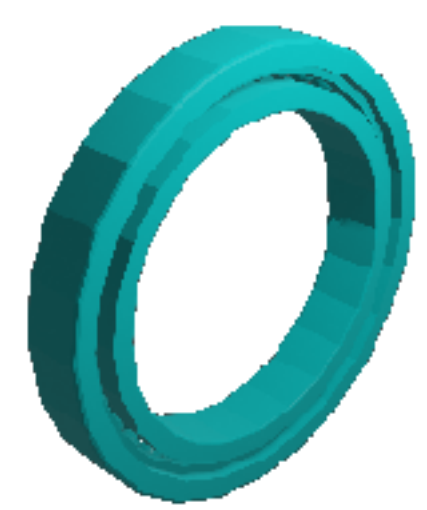

Radial contact  
ball bearings

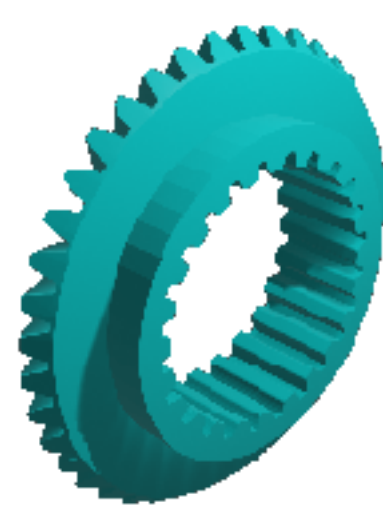

Right  
angular gearings

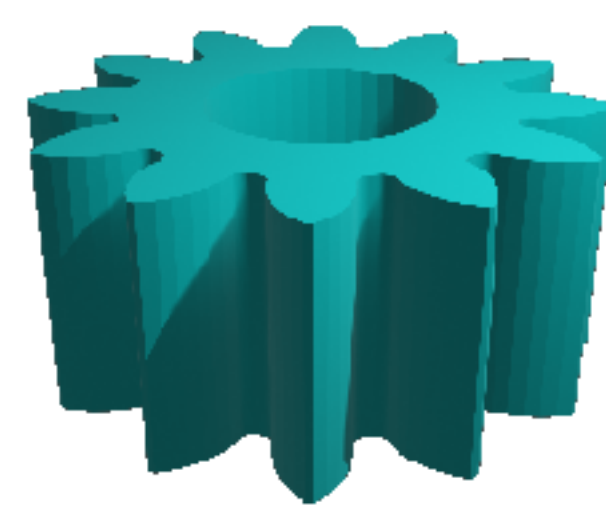

Right spur gears

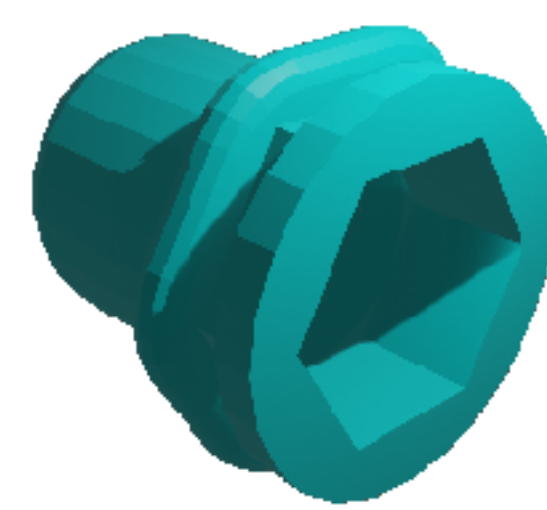

Rivet nut

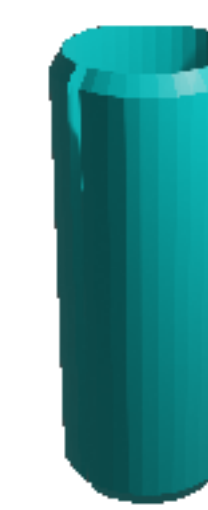

Roll pins

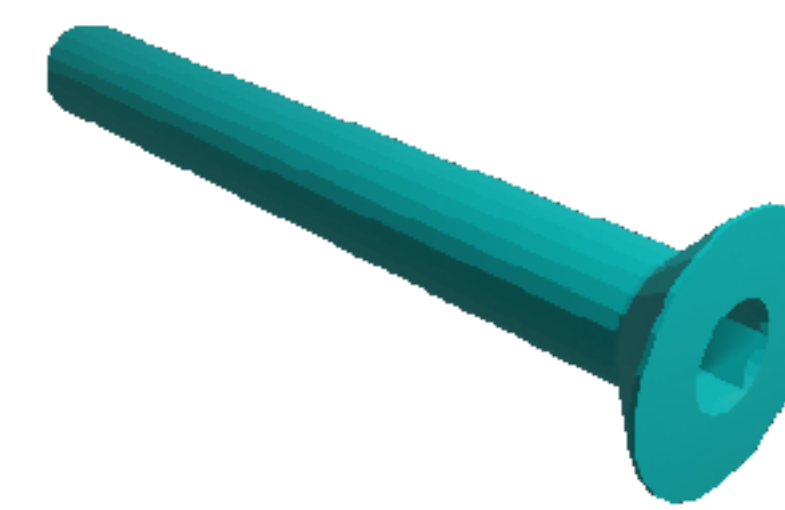

Screws and bolts \w  
countersunk head

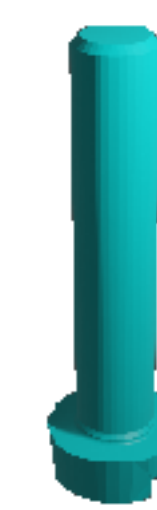

Screws and bolts \w  
cylindrical head

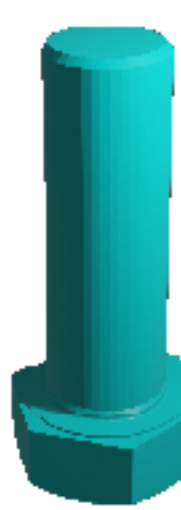

Screws and bolts \w  
hexagonal head

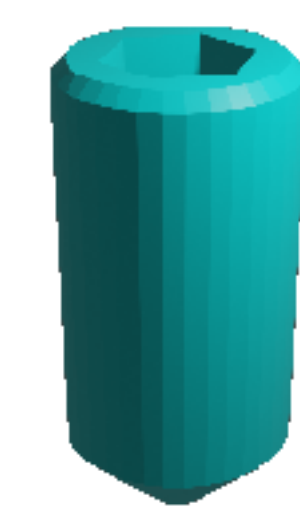

Setscrew

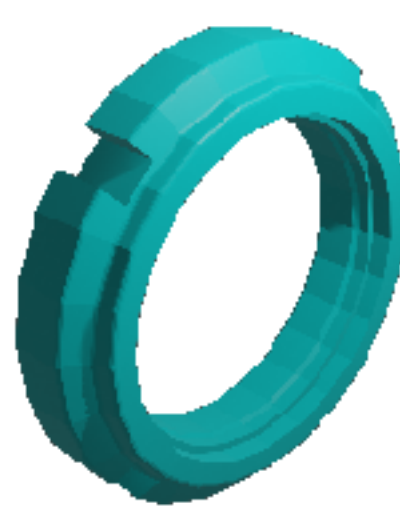

Slotted nuts

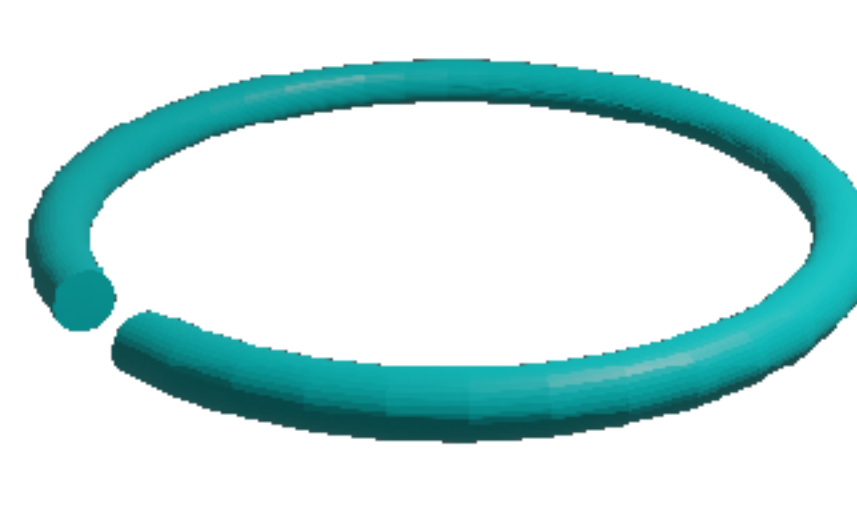

Snap rings

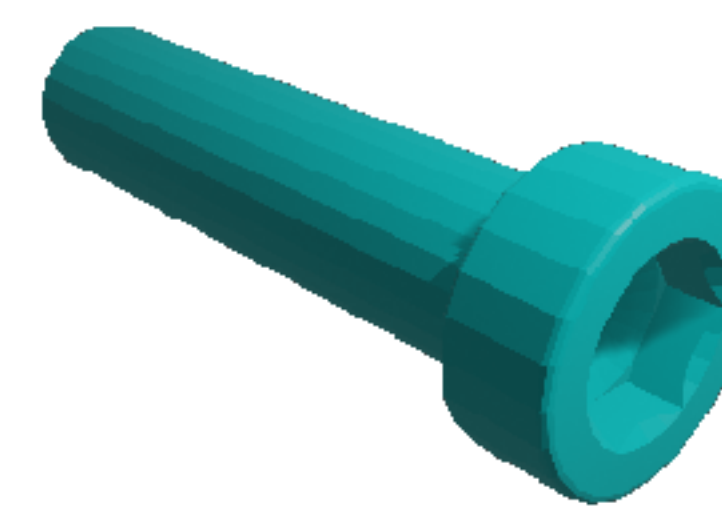

Socket

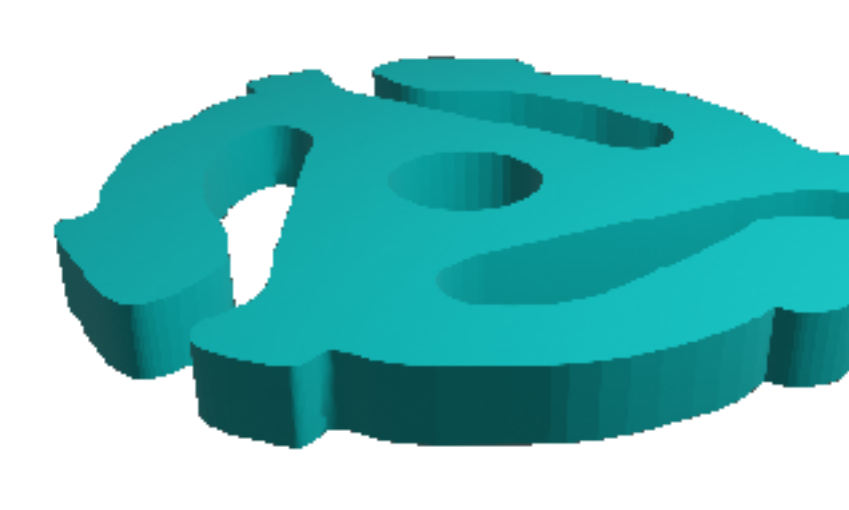

Spacers

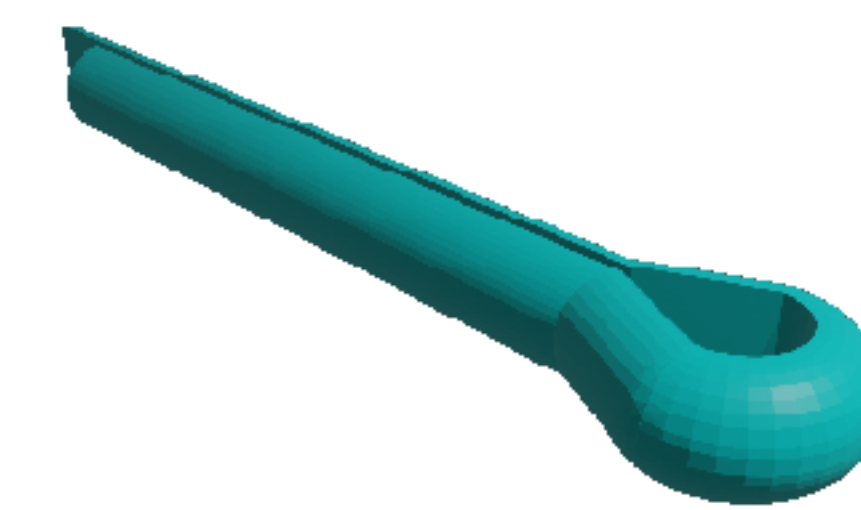

Split pins

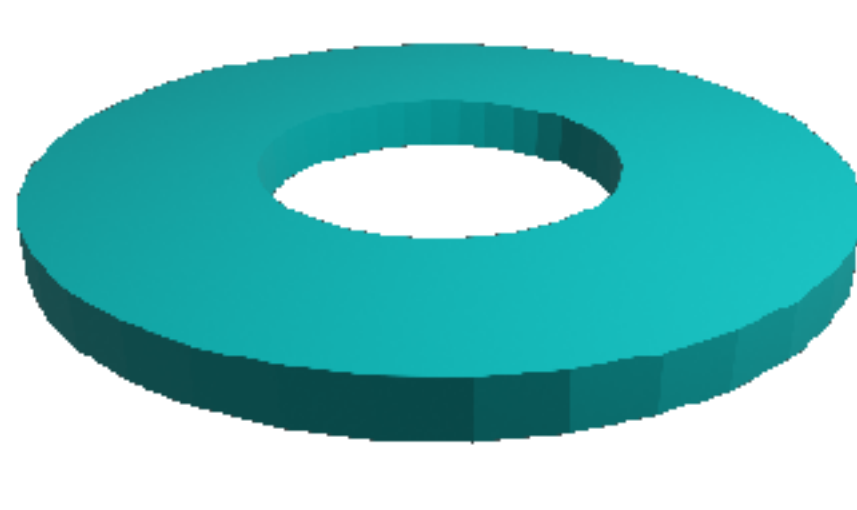

Spring washers

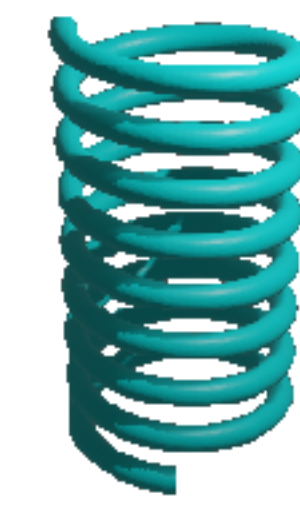

Springs

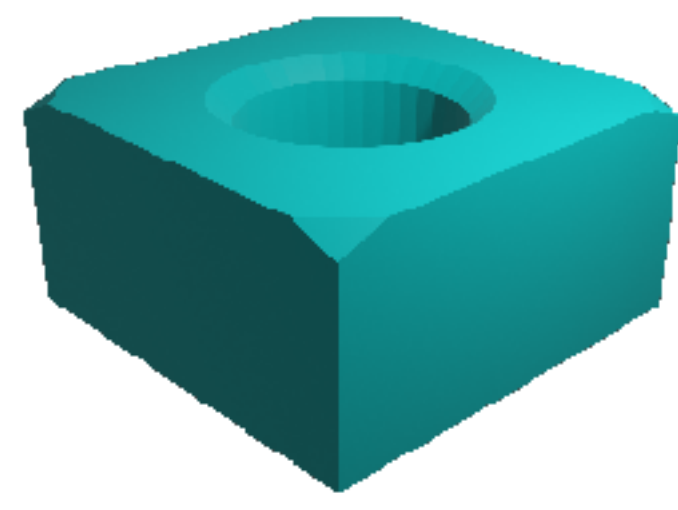

Square nuts

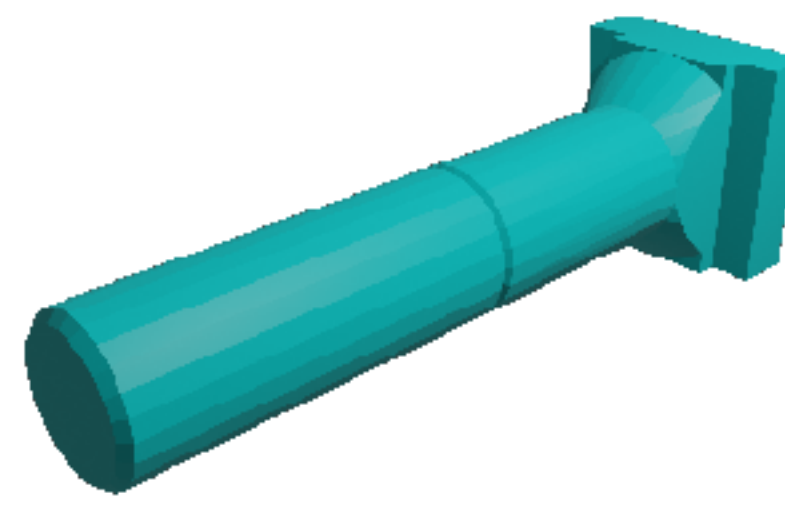

Square

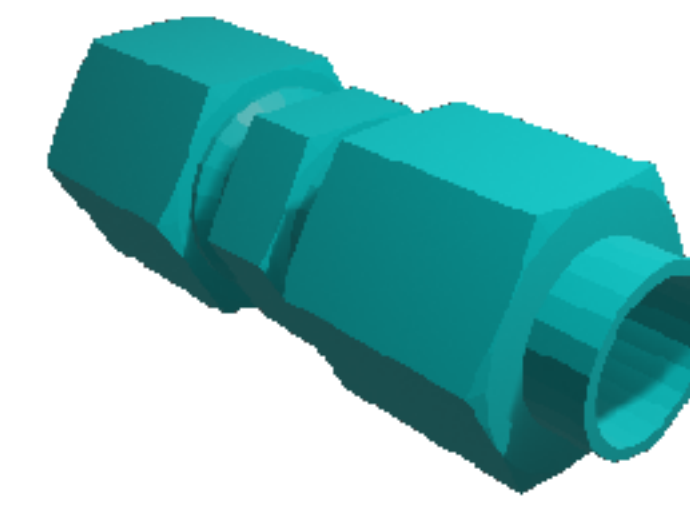

Standard fitting

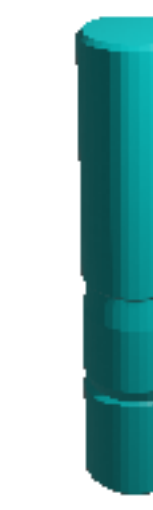

Studs

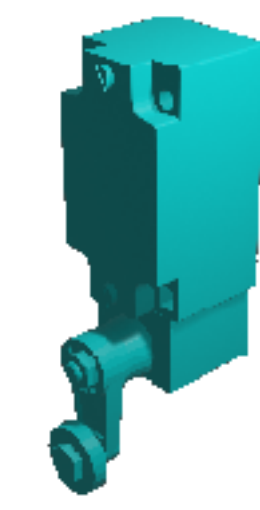

Switch

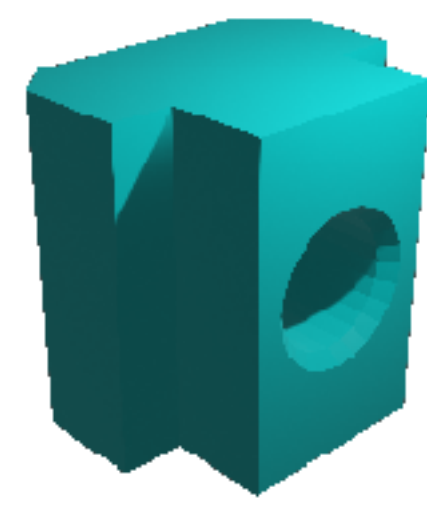

T-nut

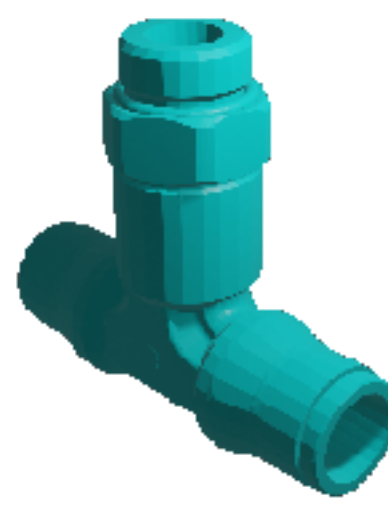

T-shape fittings

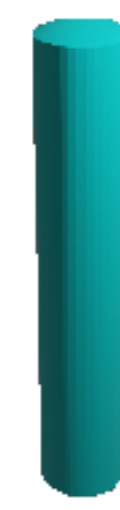

Taper pins

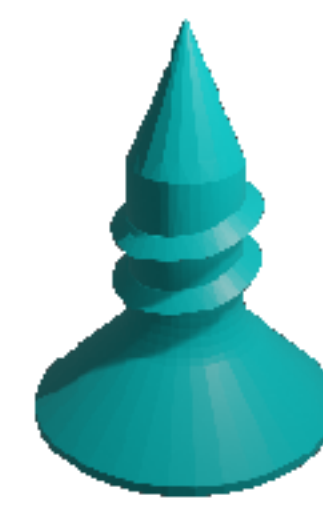

Tapping screws

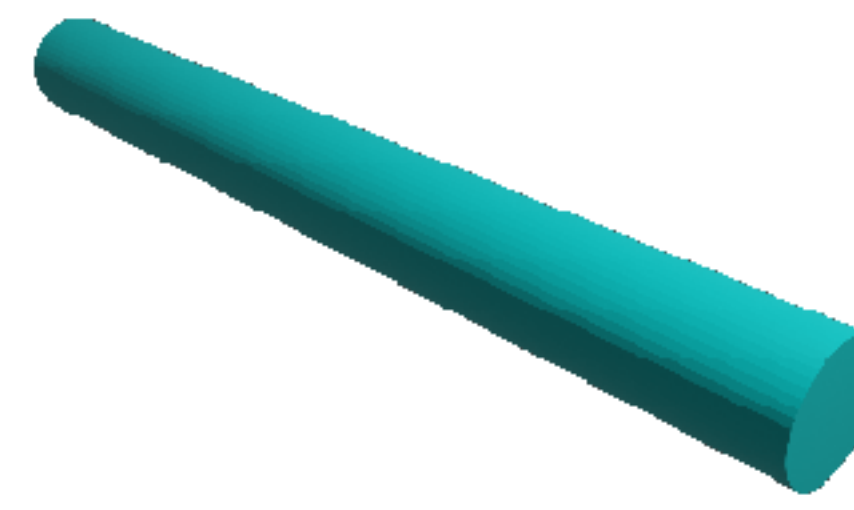

Threaded rods

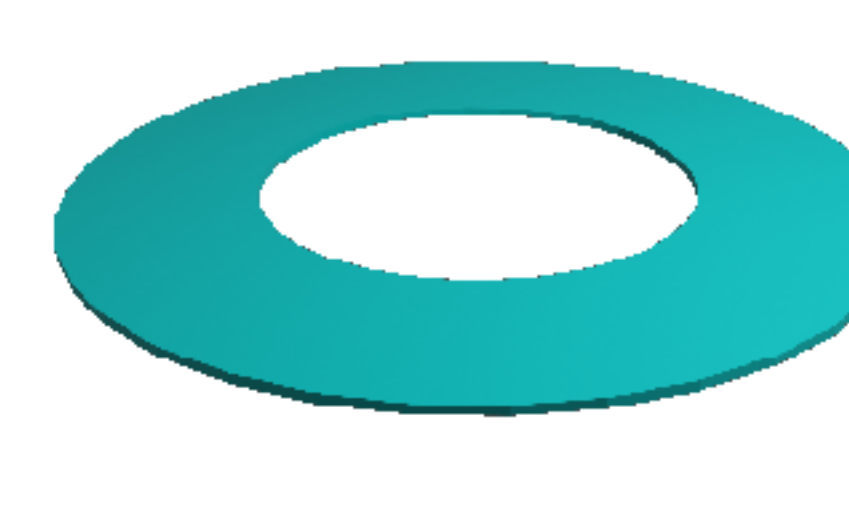

Thrust washers

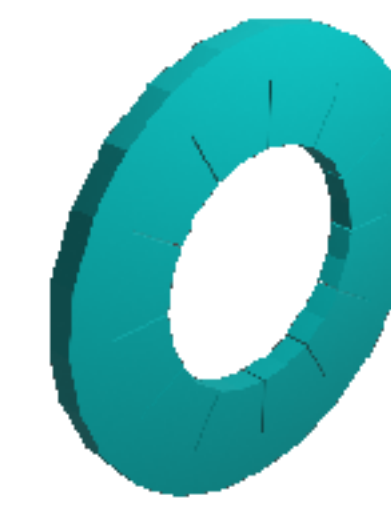

Toothed

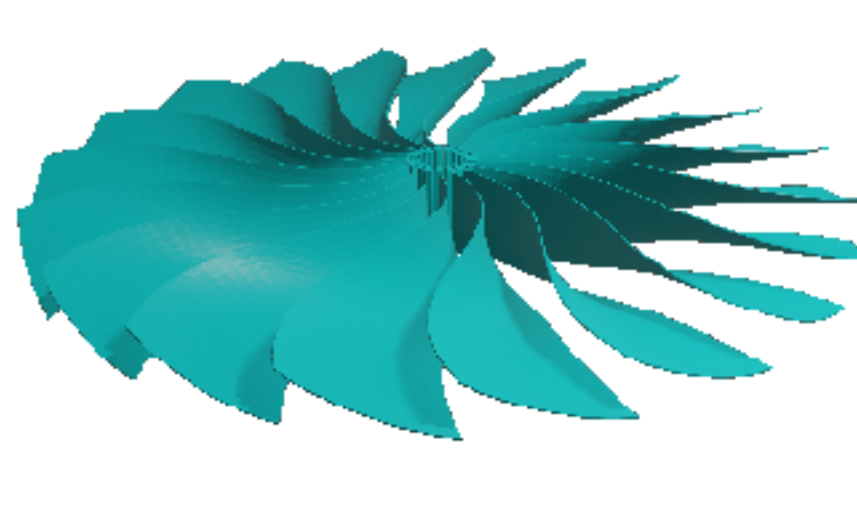

Turbine

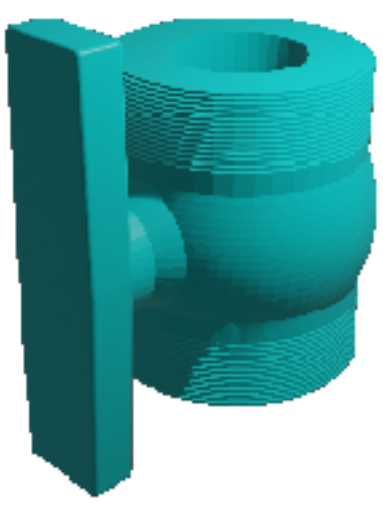

Valves

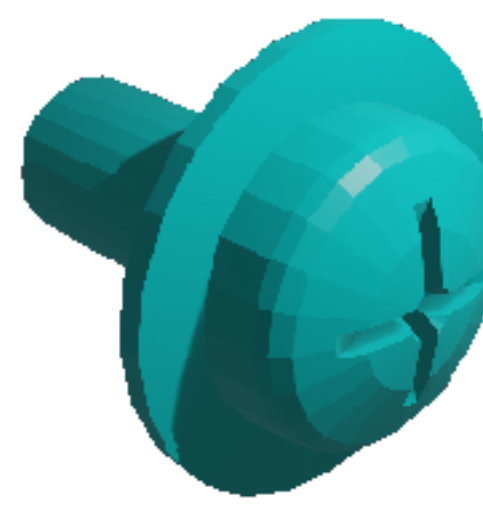

Washer bolts

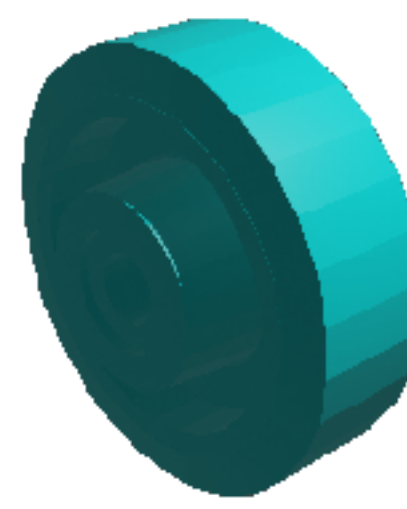

Wheel

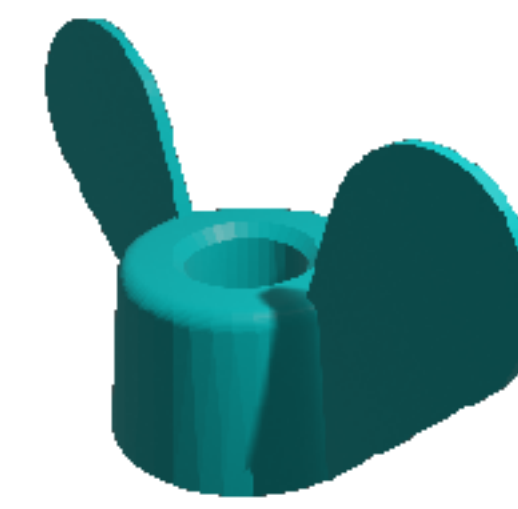

Wingnuts
