# Supplementary material
Source: ML conference proceedings conference paper supplement (https://www.ecva.net/papers/eccv_2020/papers_ECCV/html/123630171_ECCV_2020_paper.php)

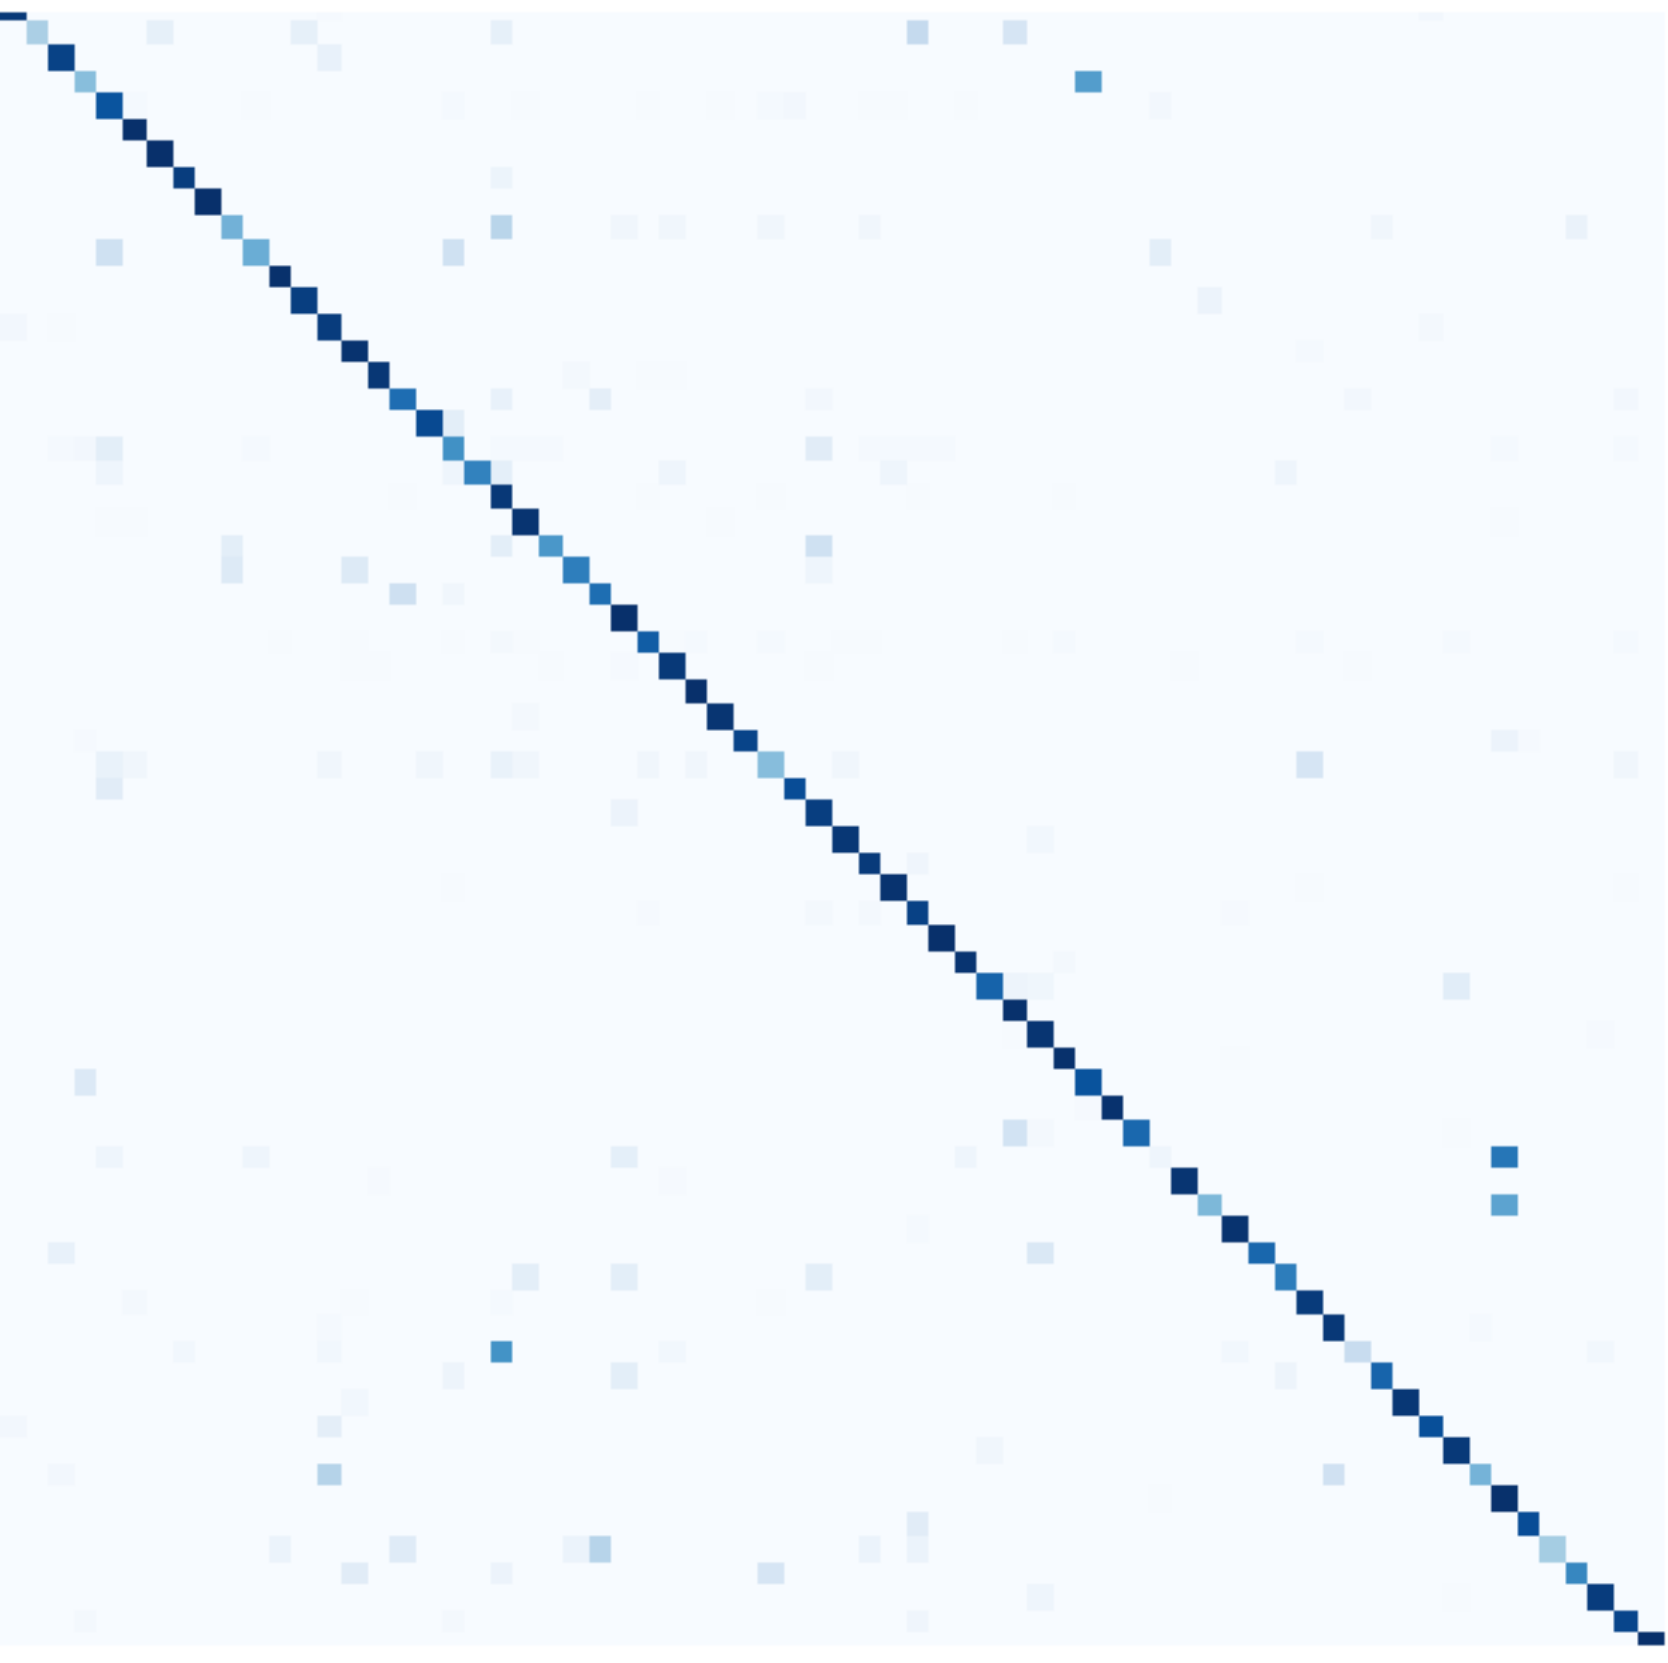

DLAN

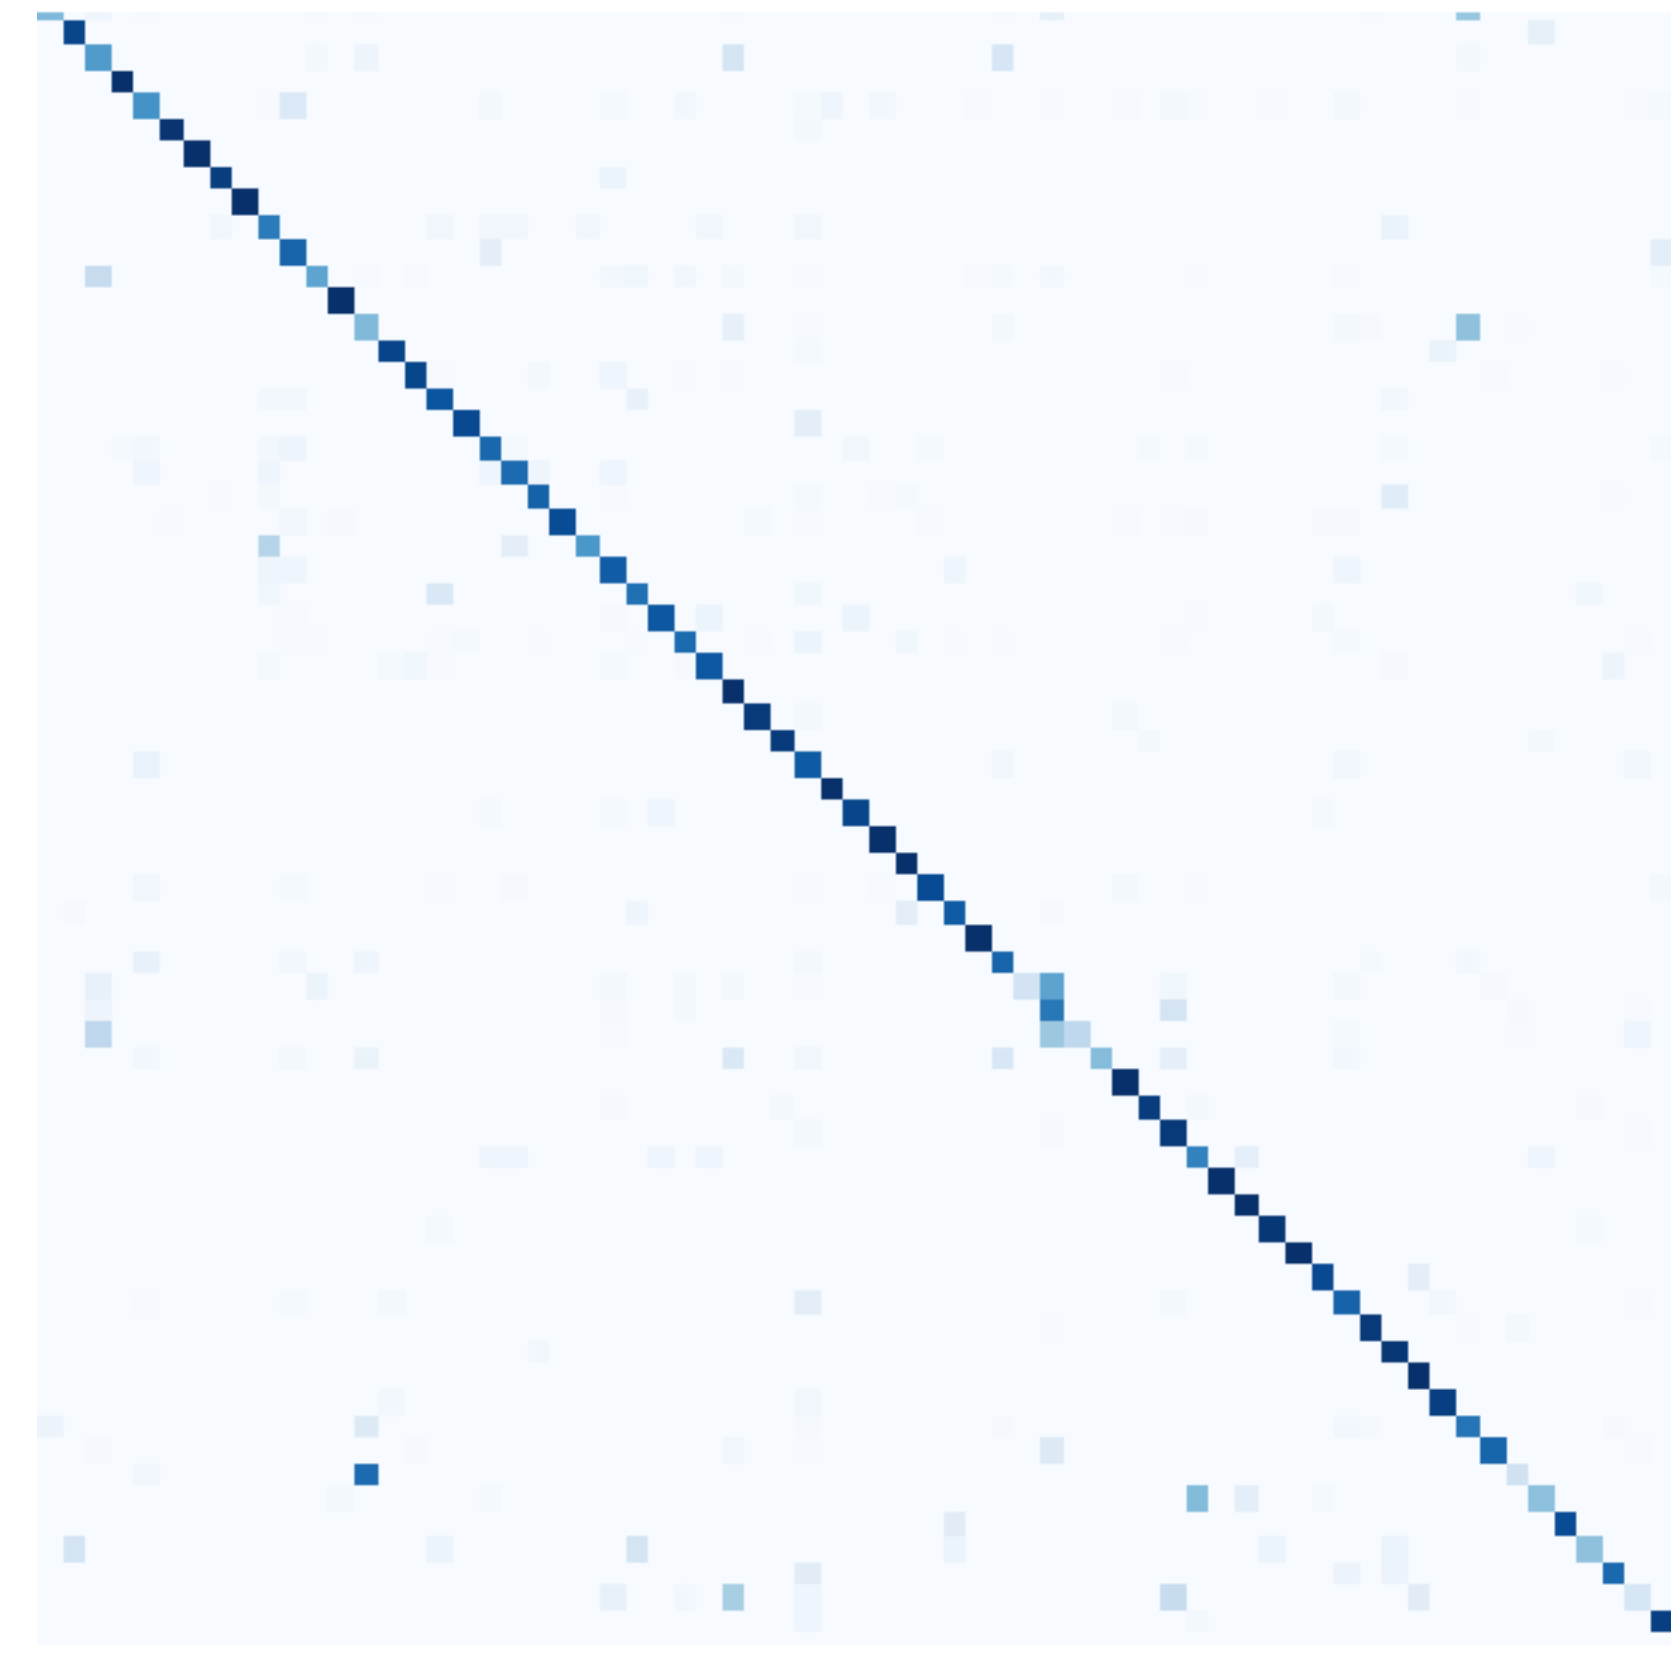

Mult-View CNN

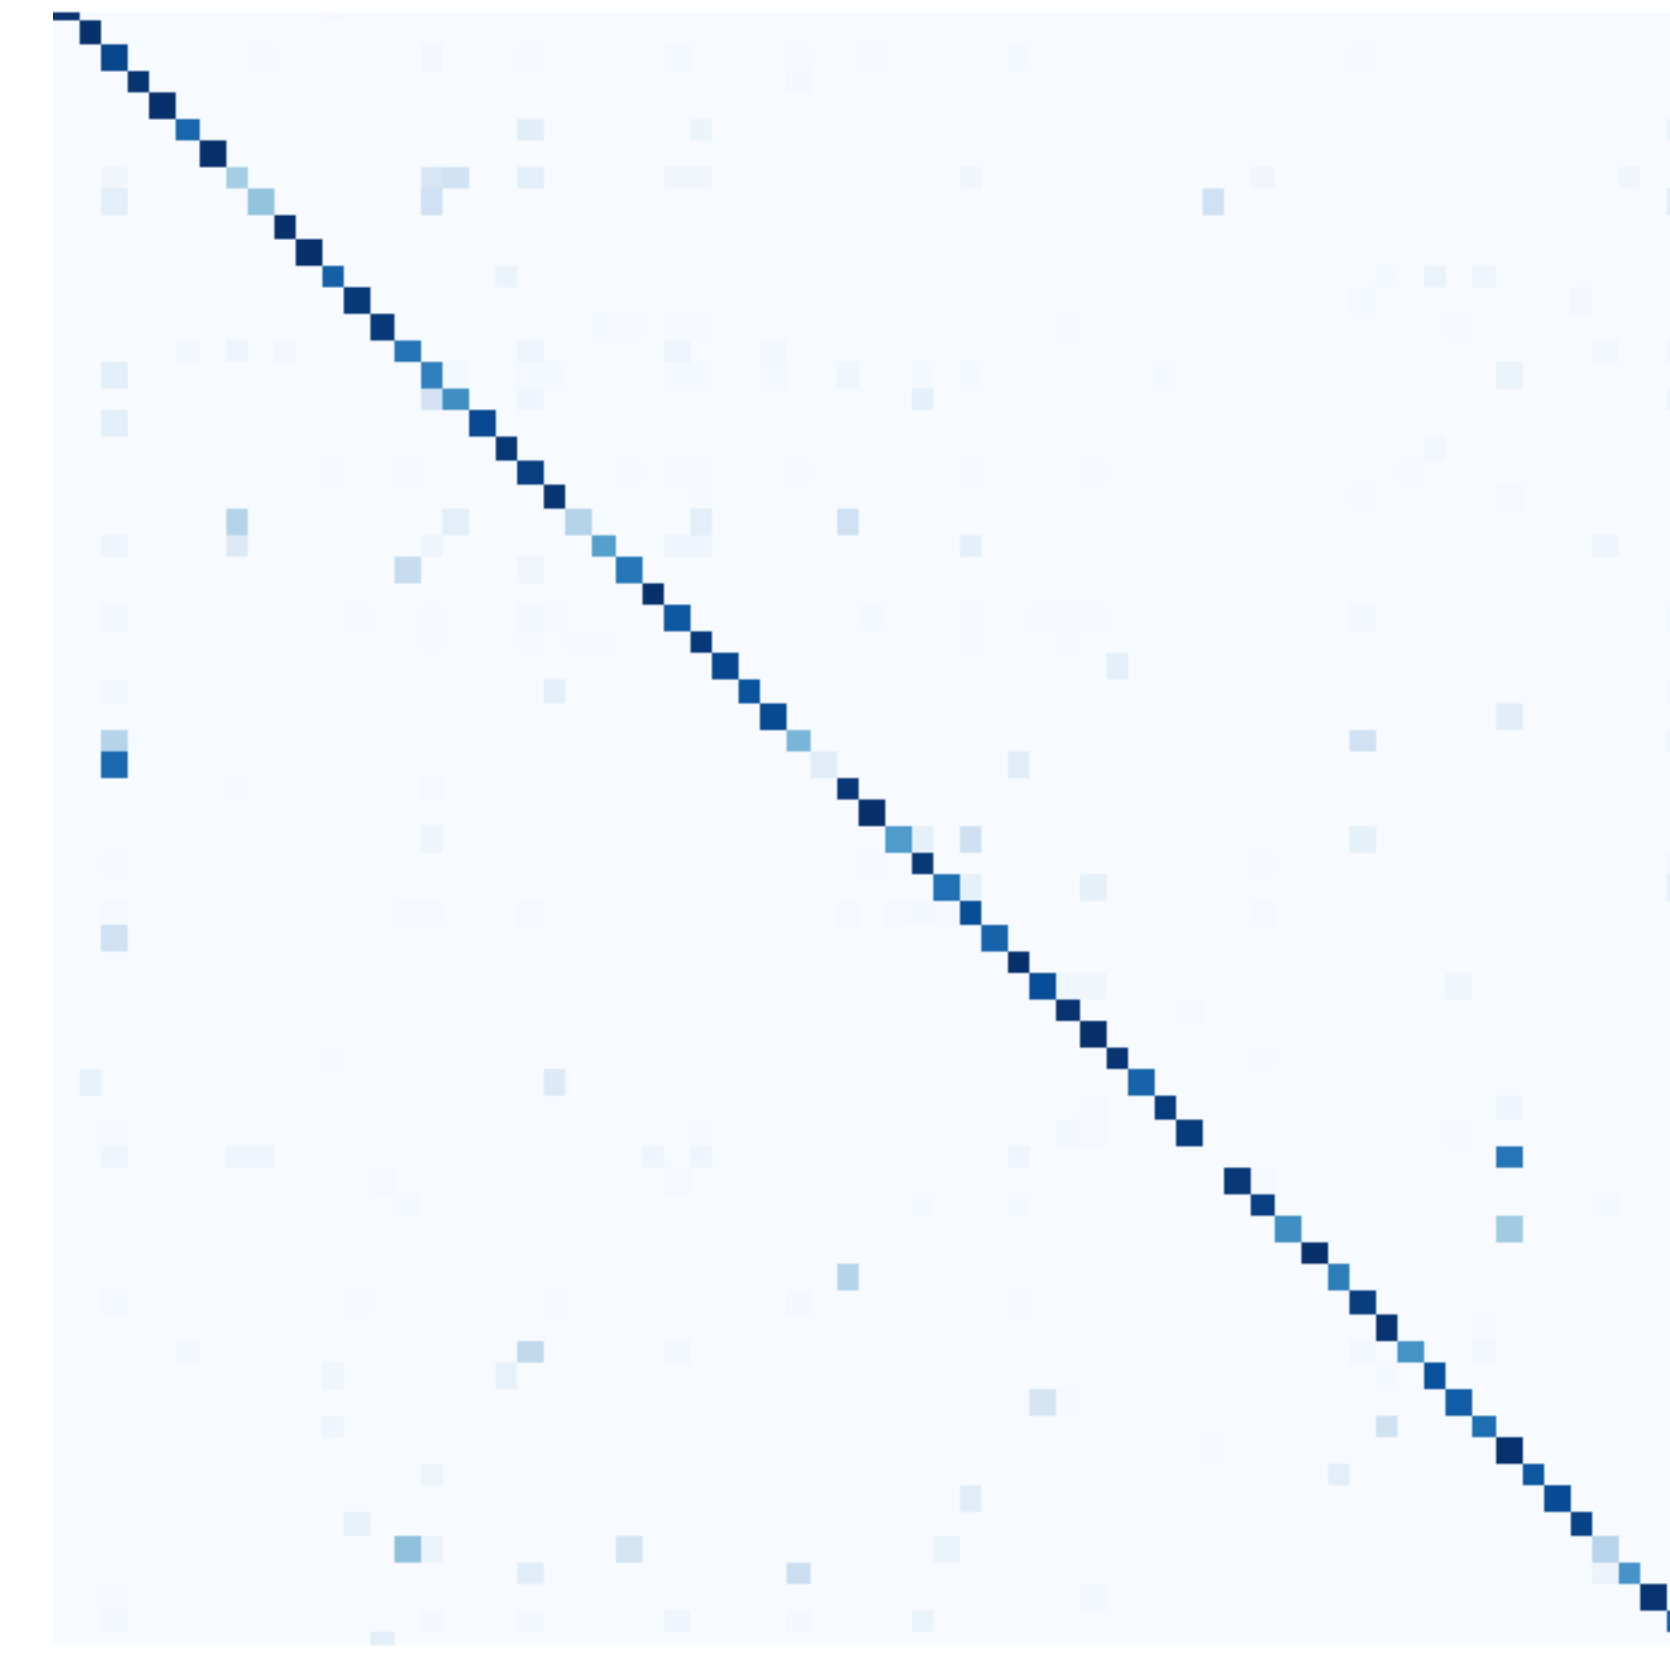

PointCNN

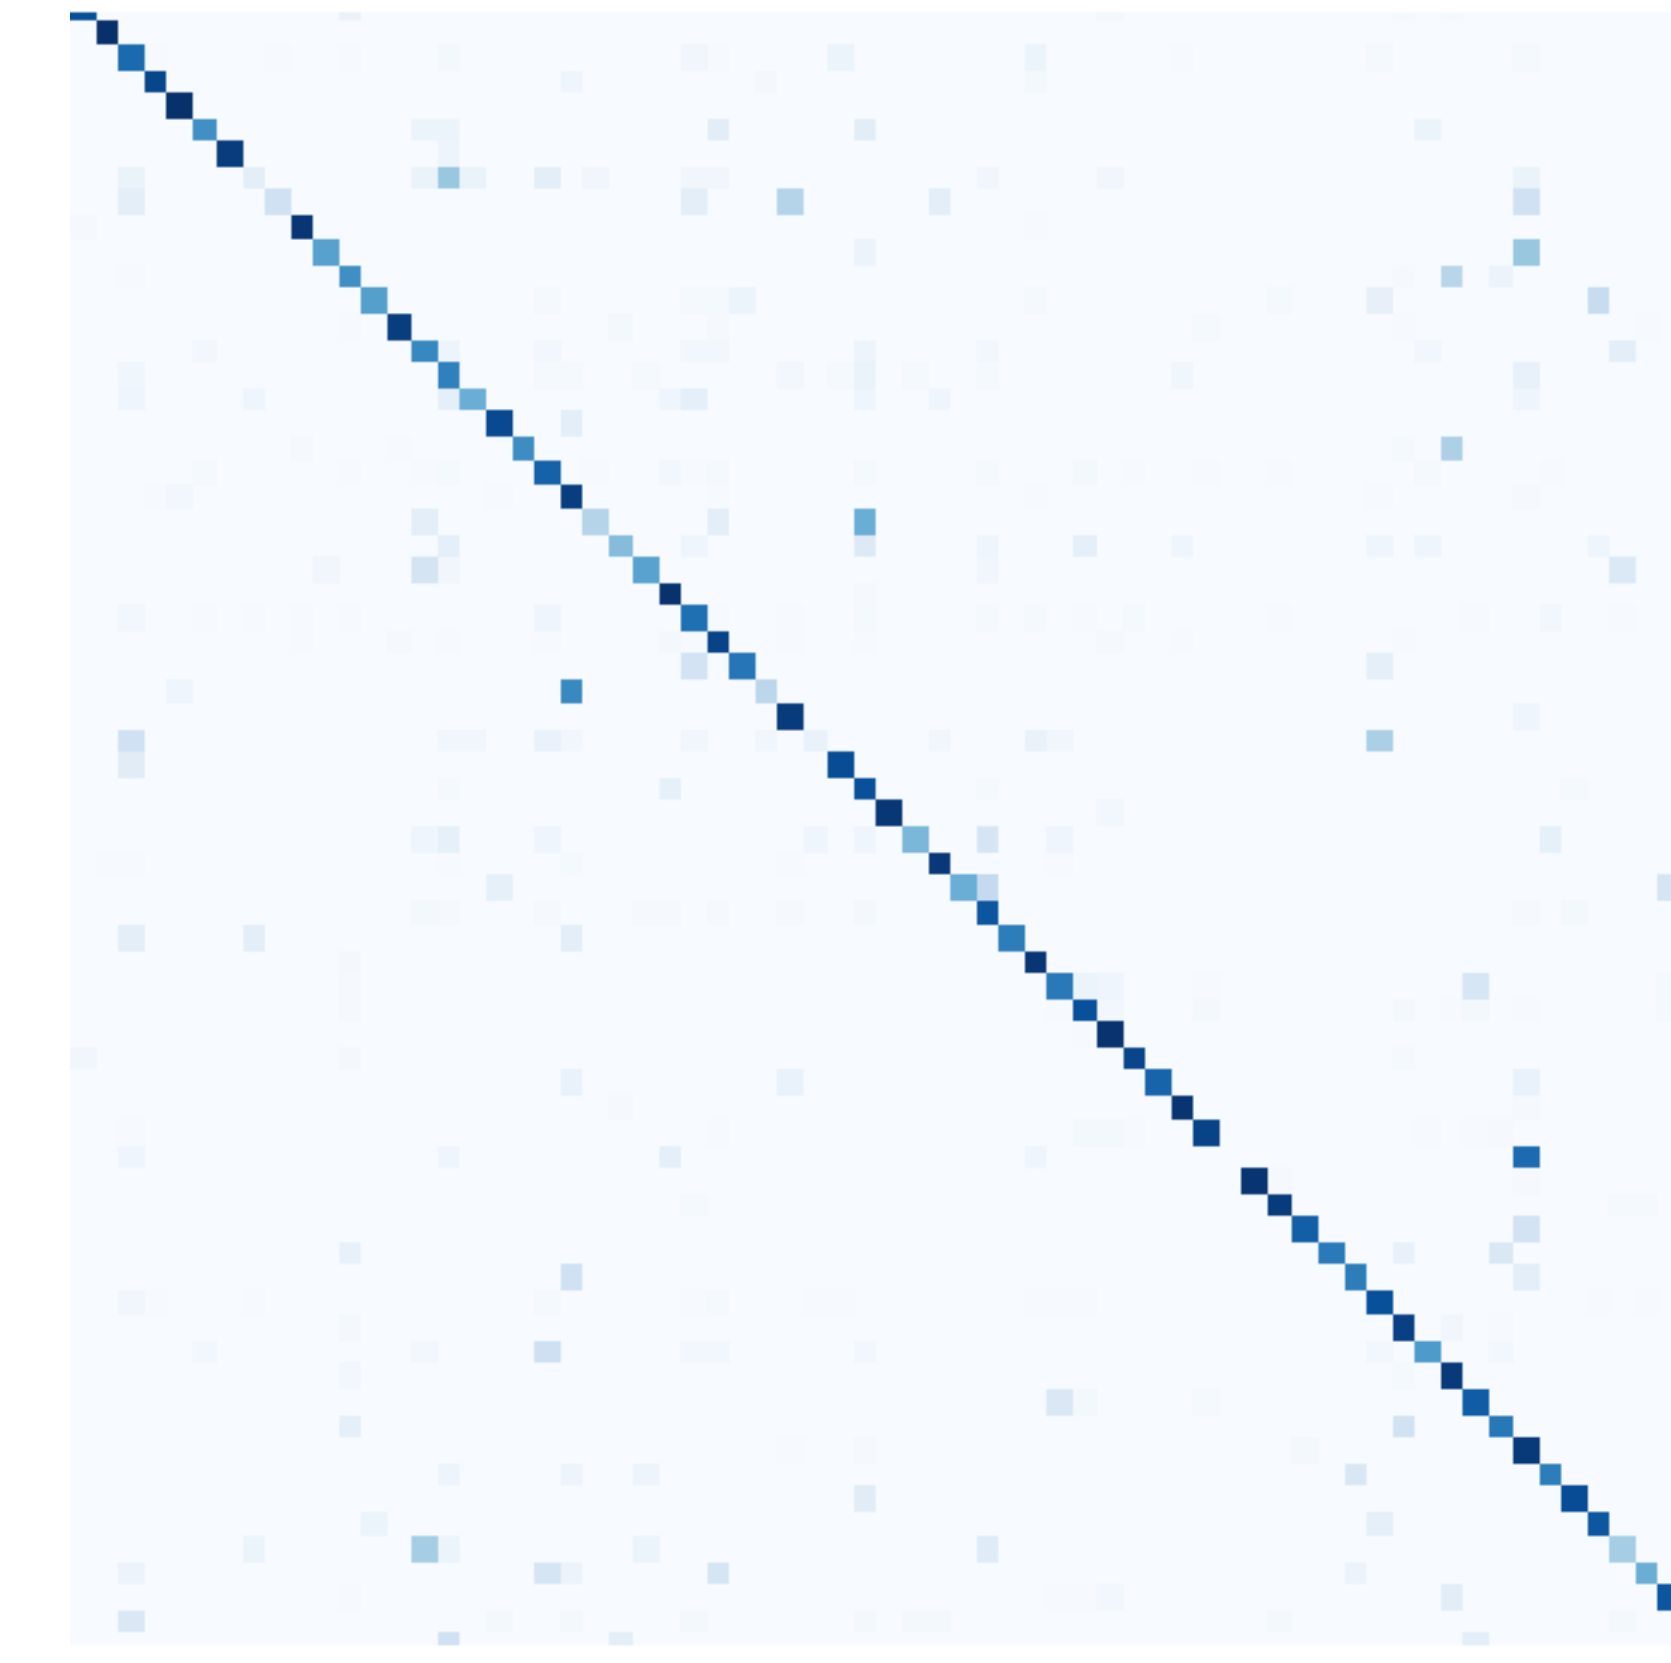

PointNet++

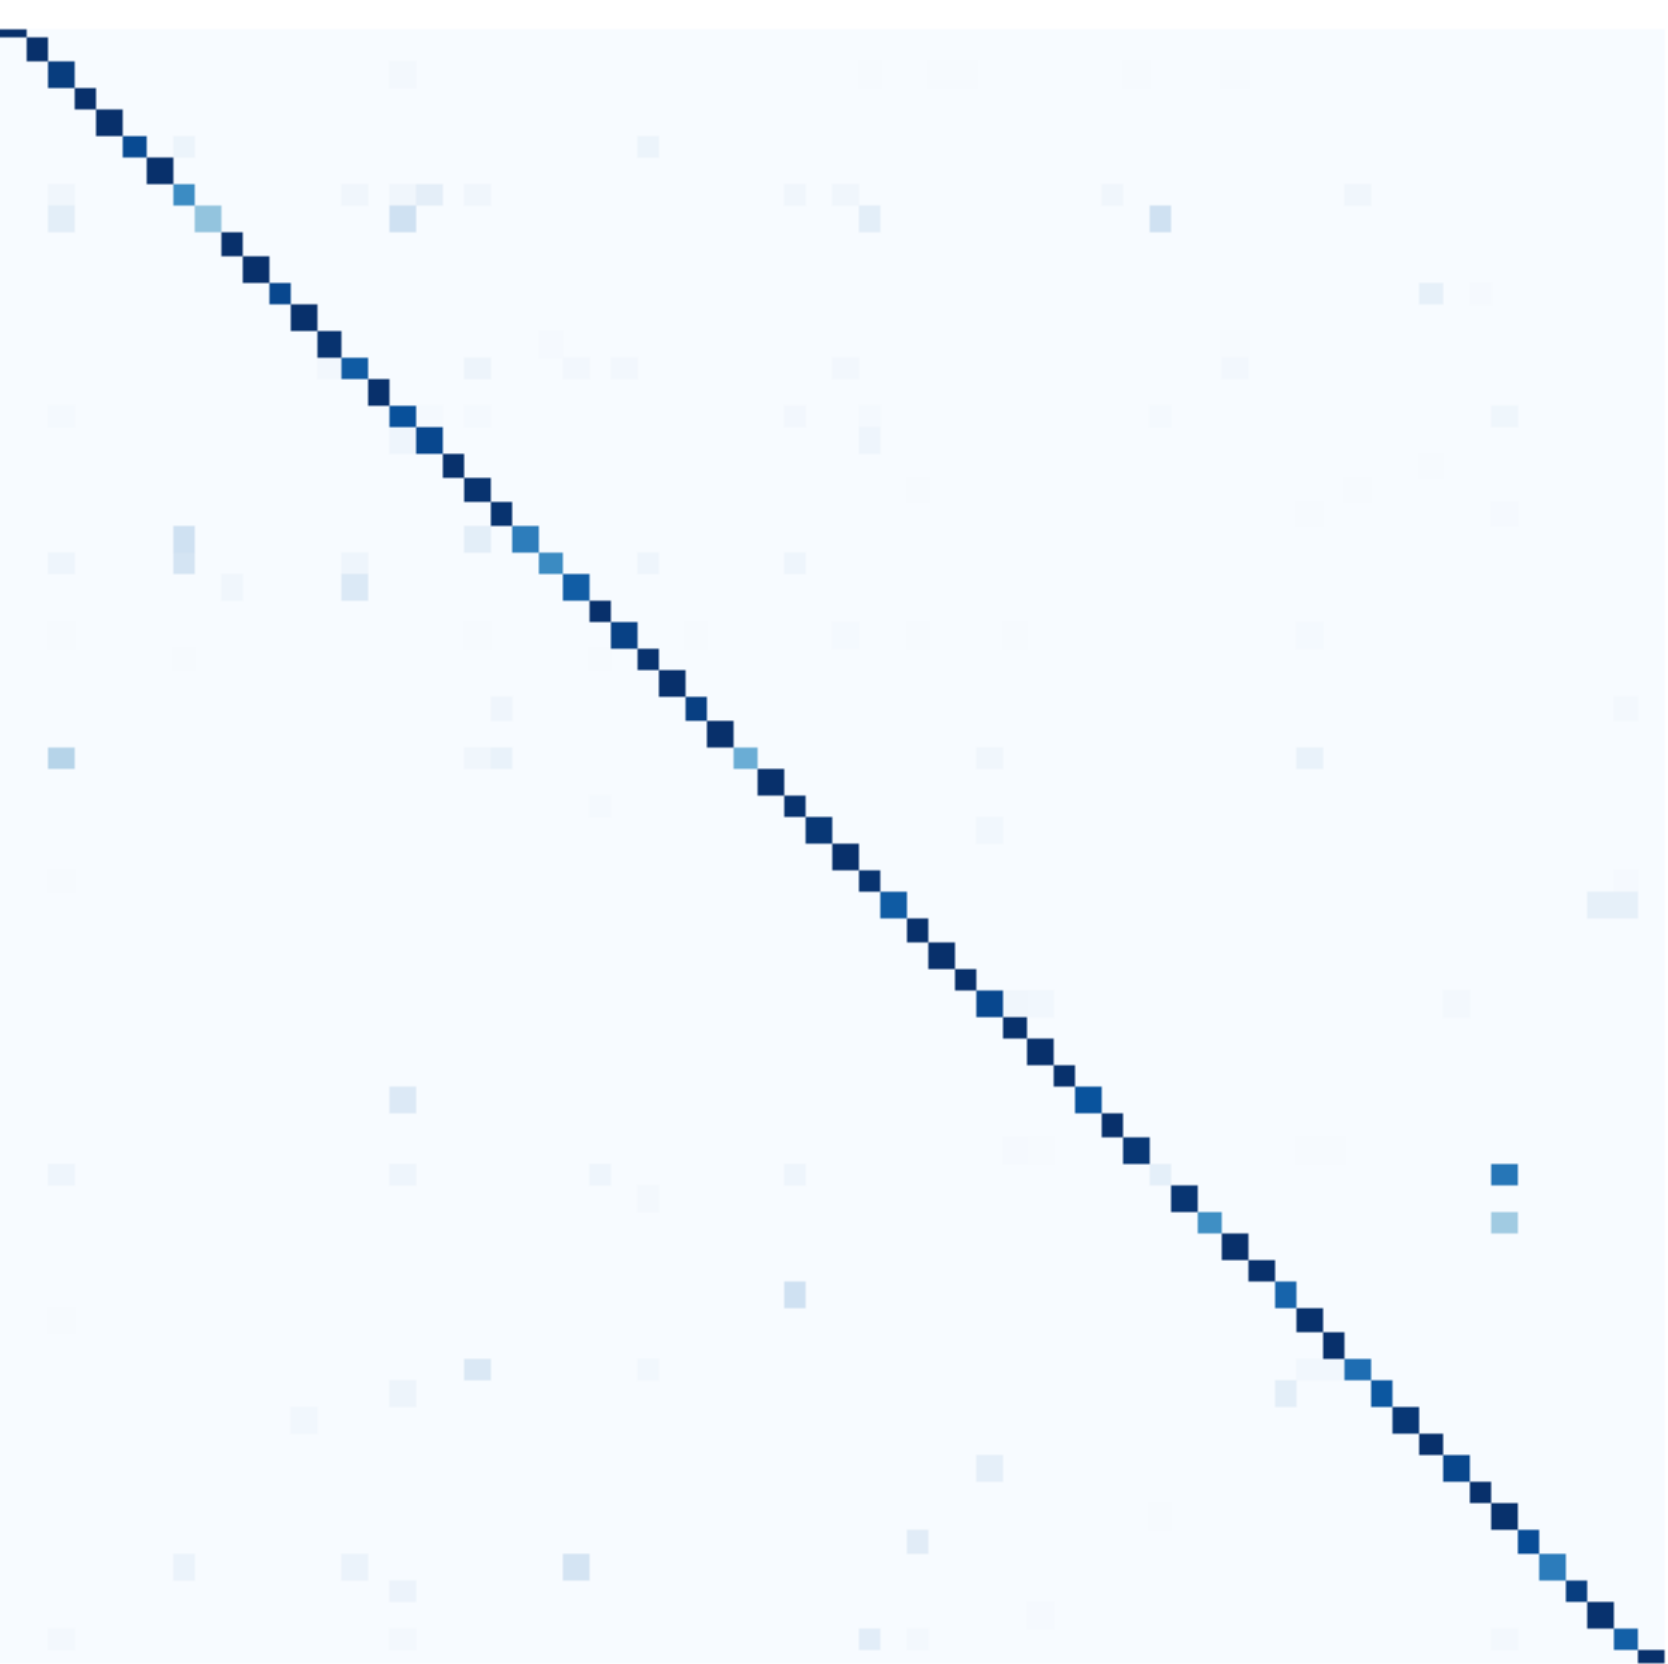

RotationNet

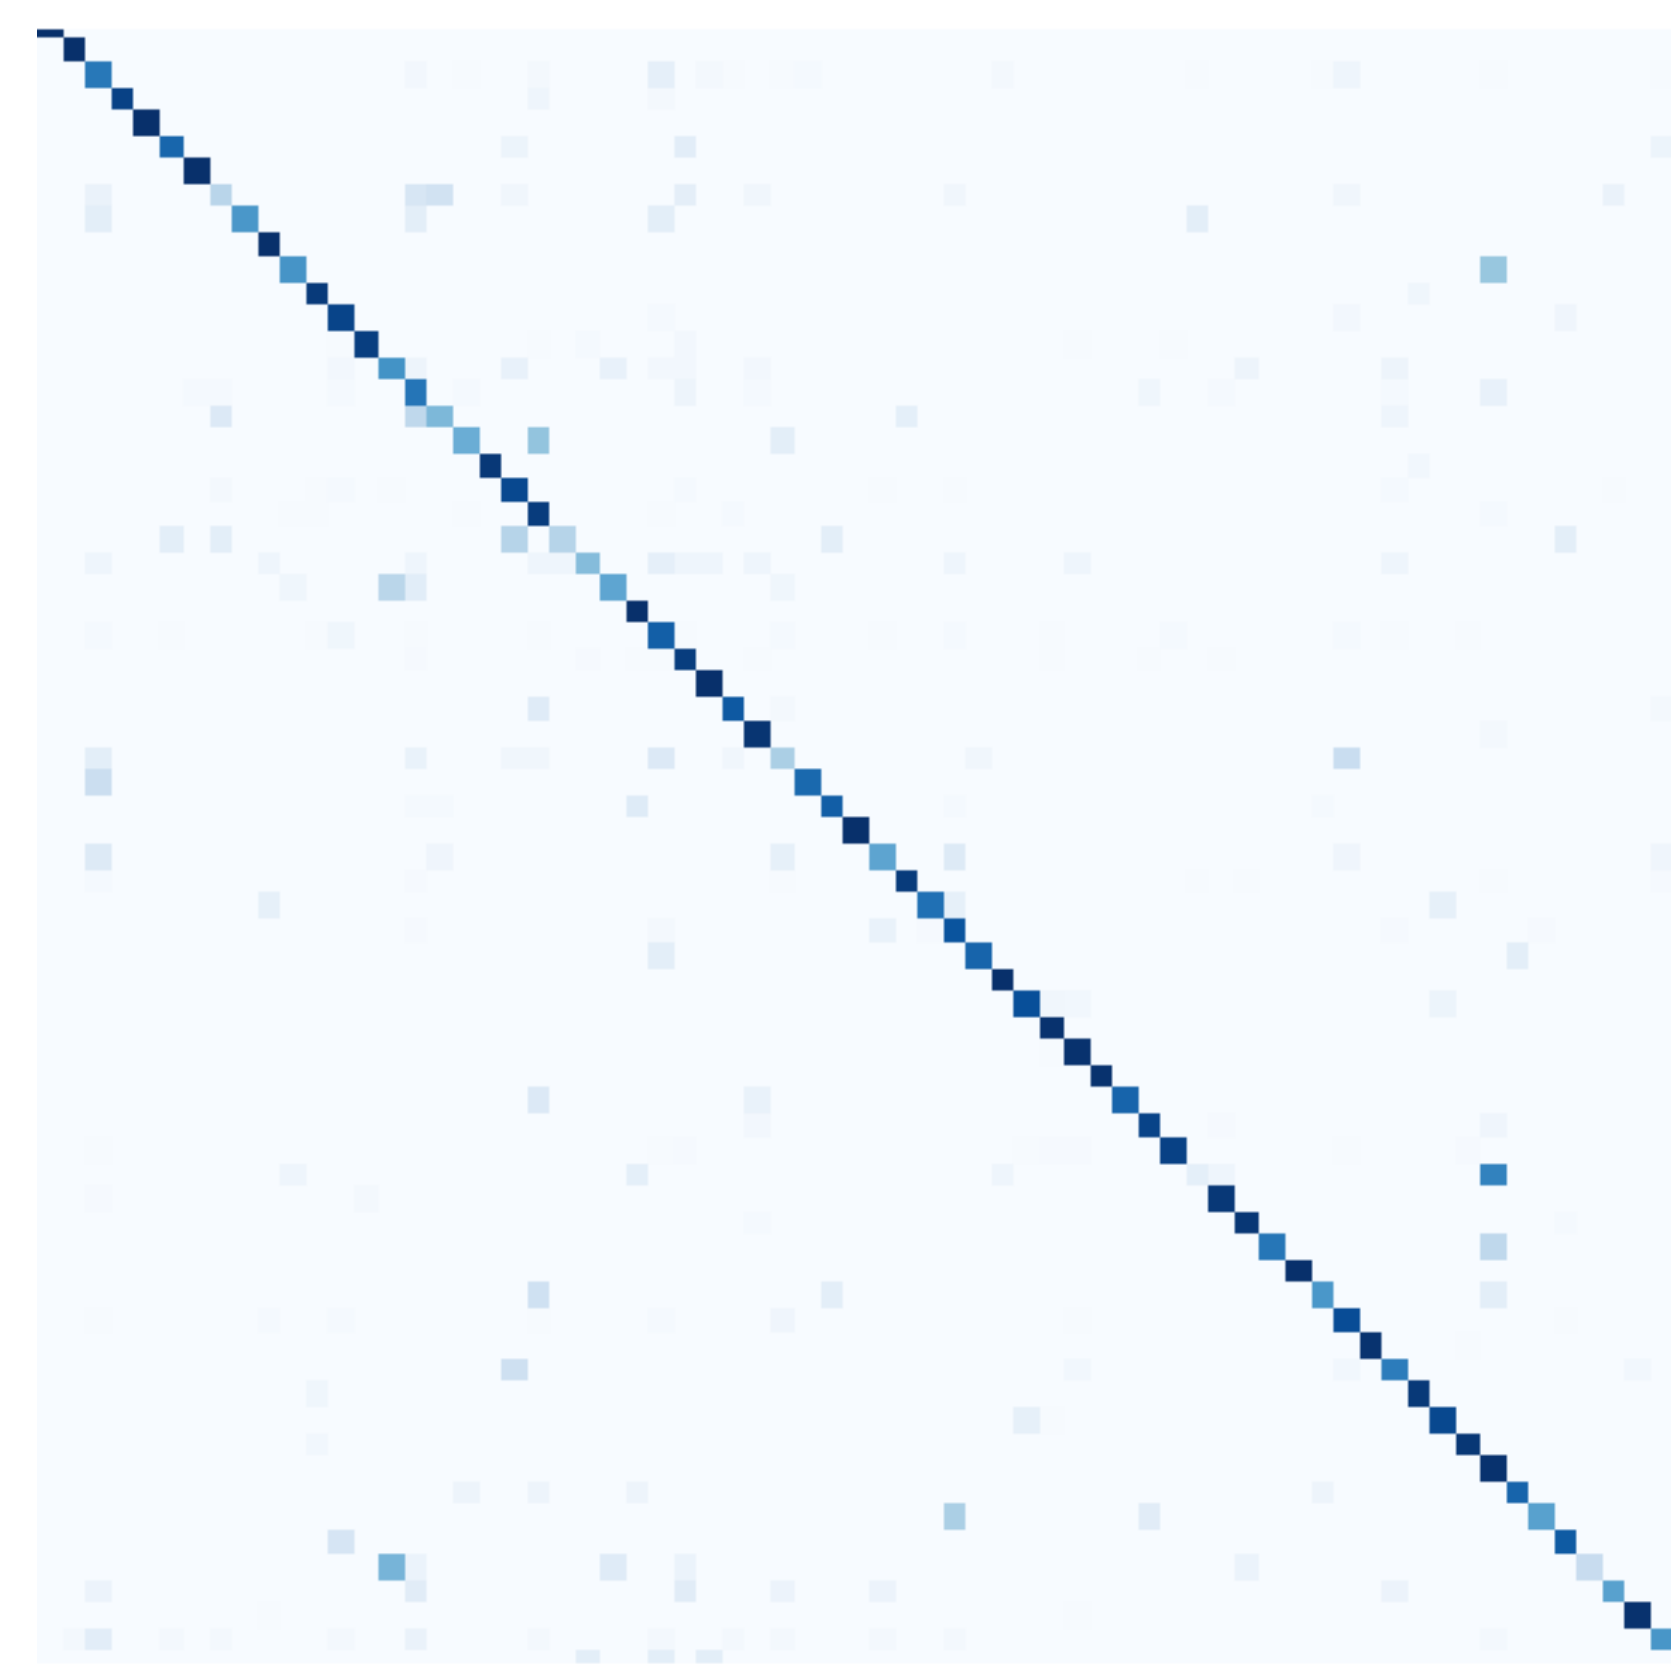

SpiderNet

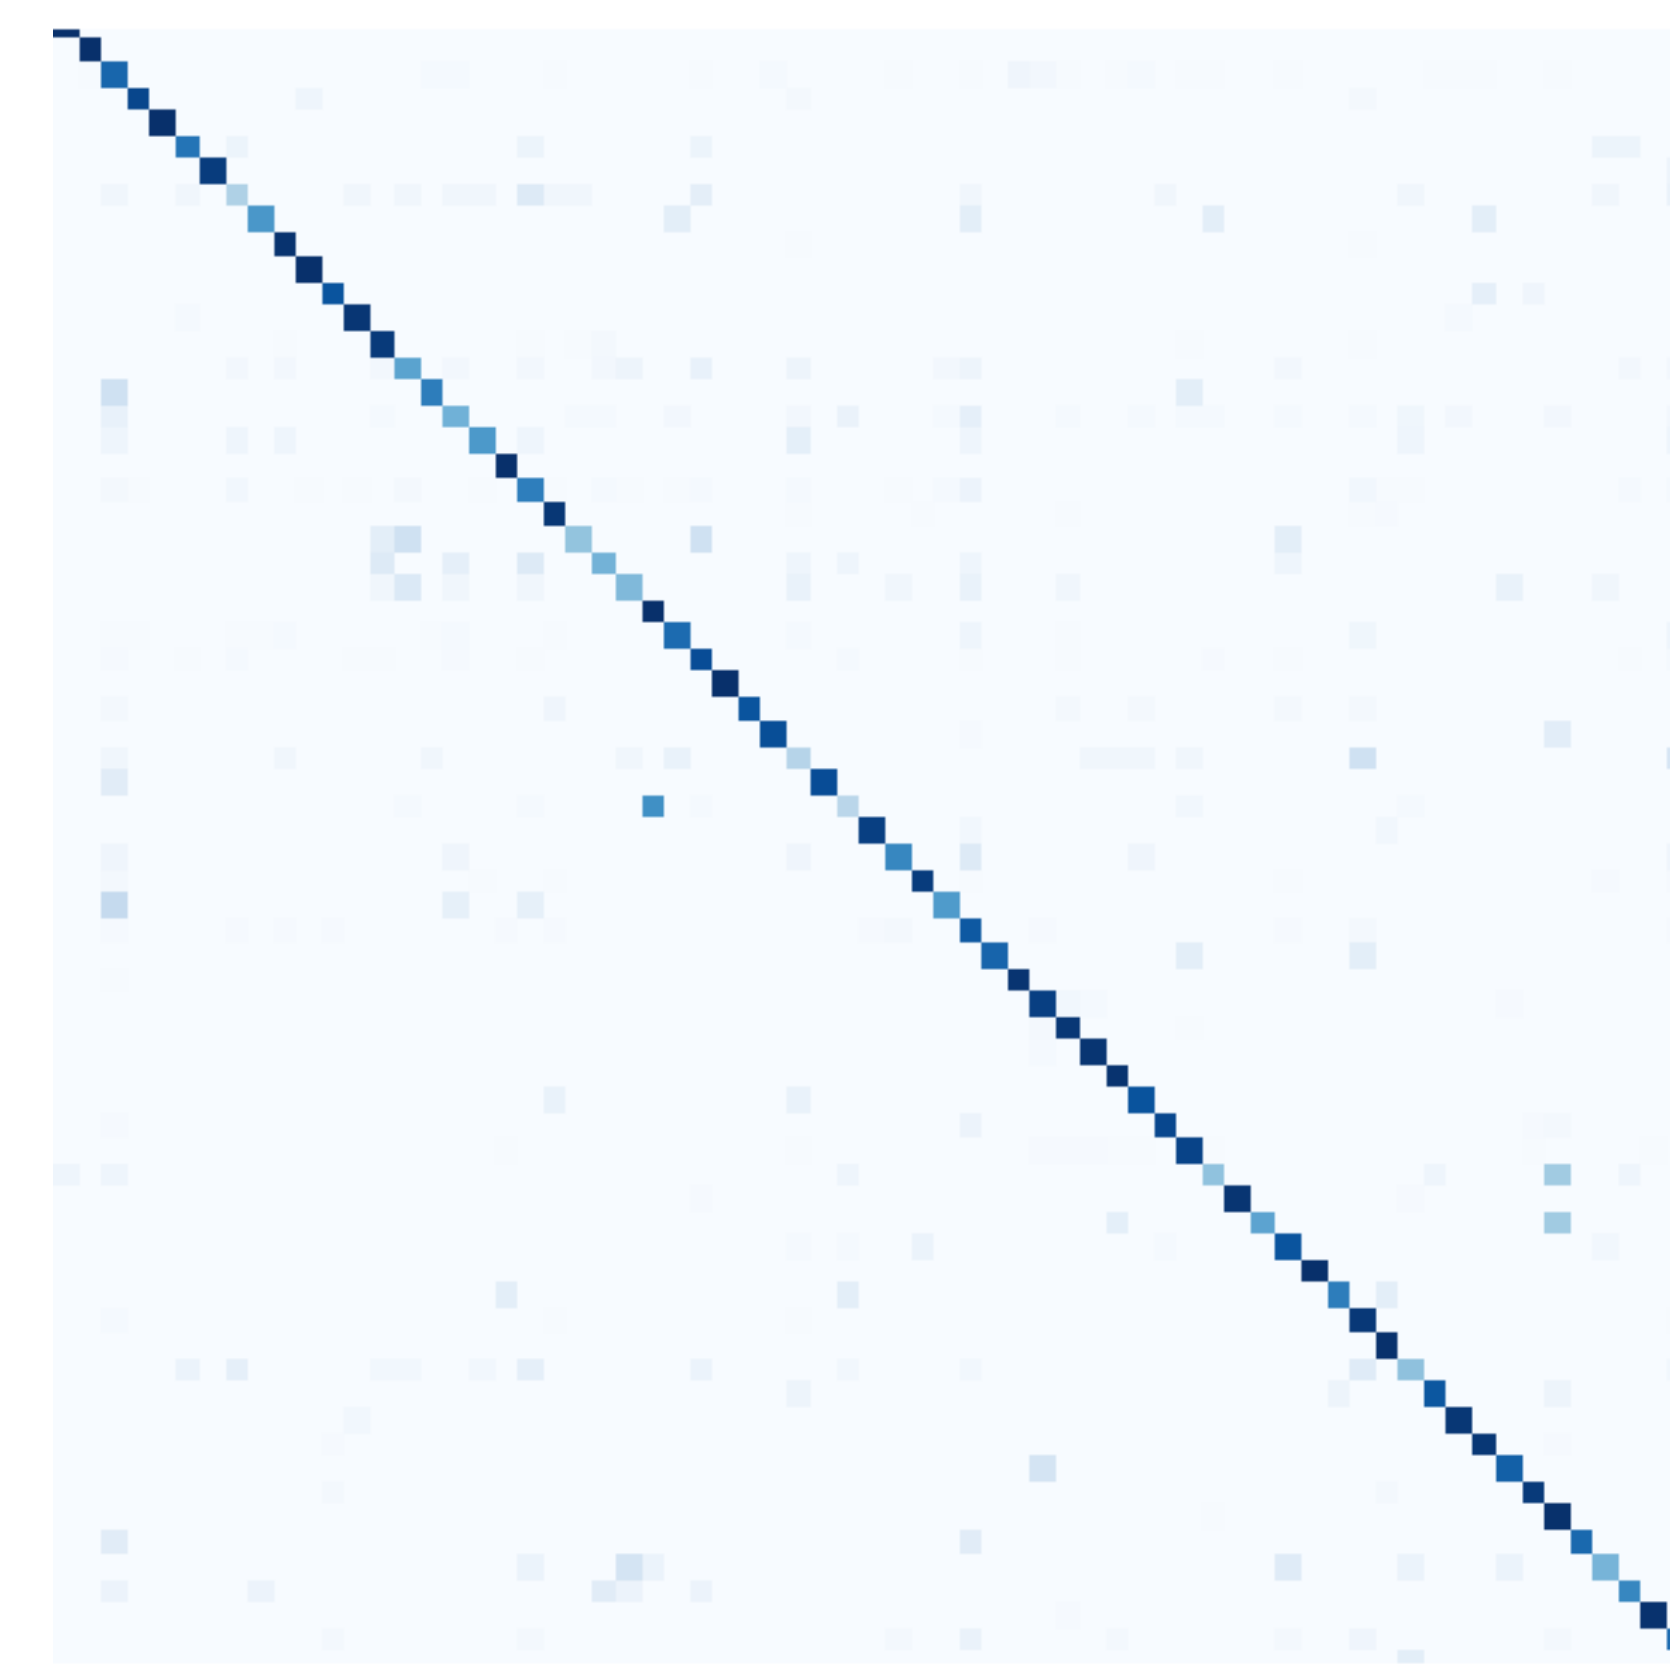

VRN

Supplement: Supplementary file 1 [file 123630171-supp.zip]

Dataset C

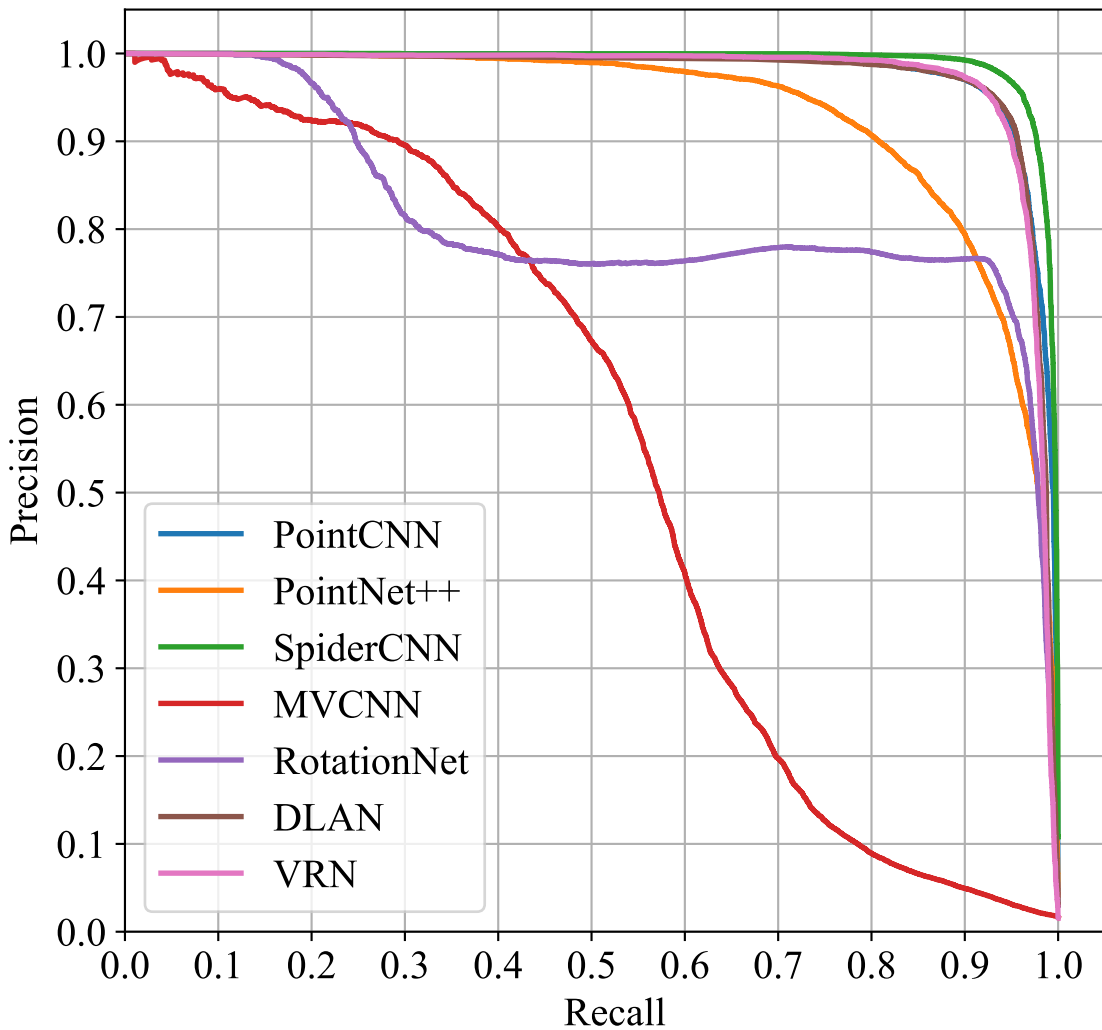

Supplement: Supplementary file 3 [file 123630171-supp.zip]

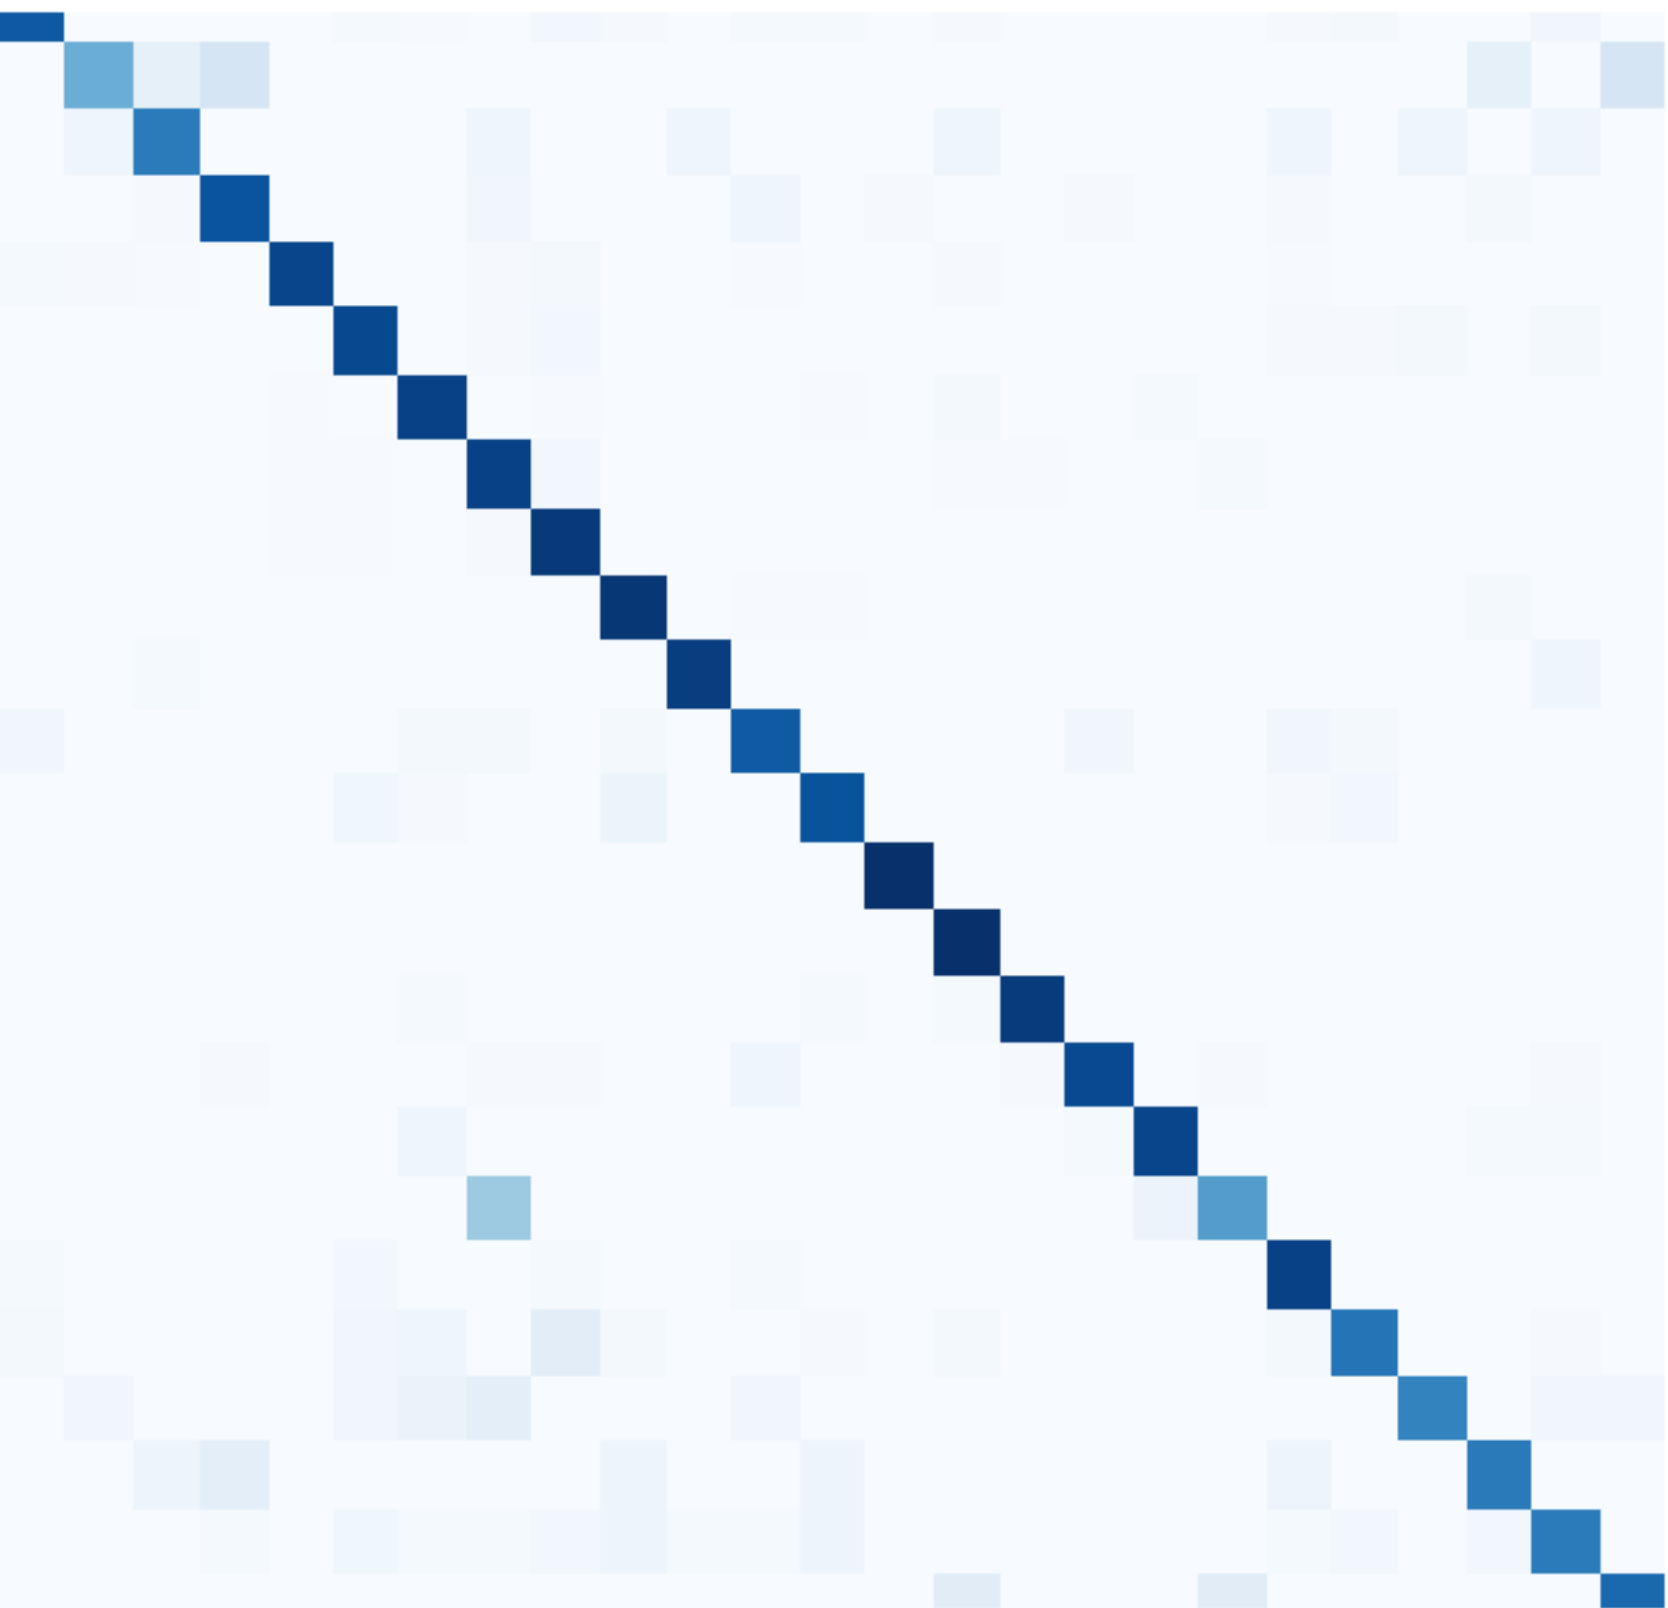

DLAN

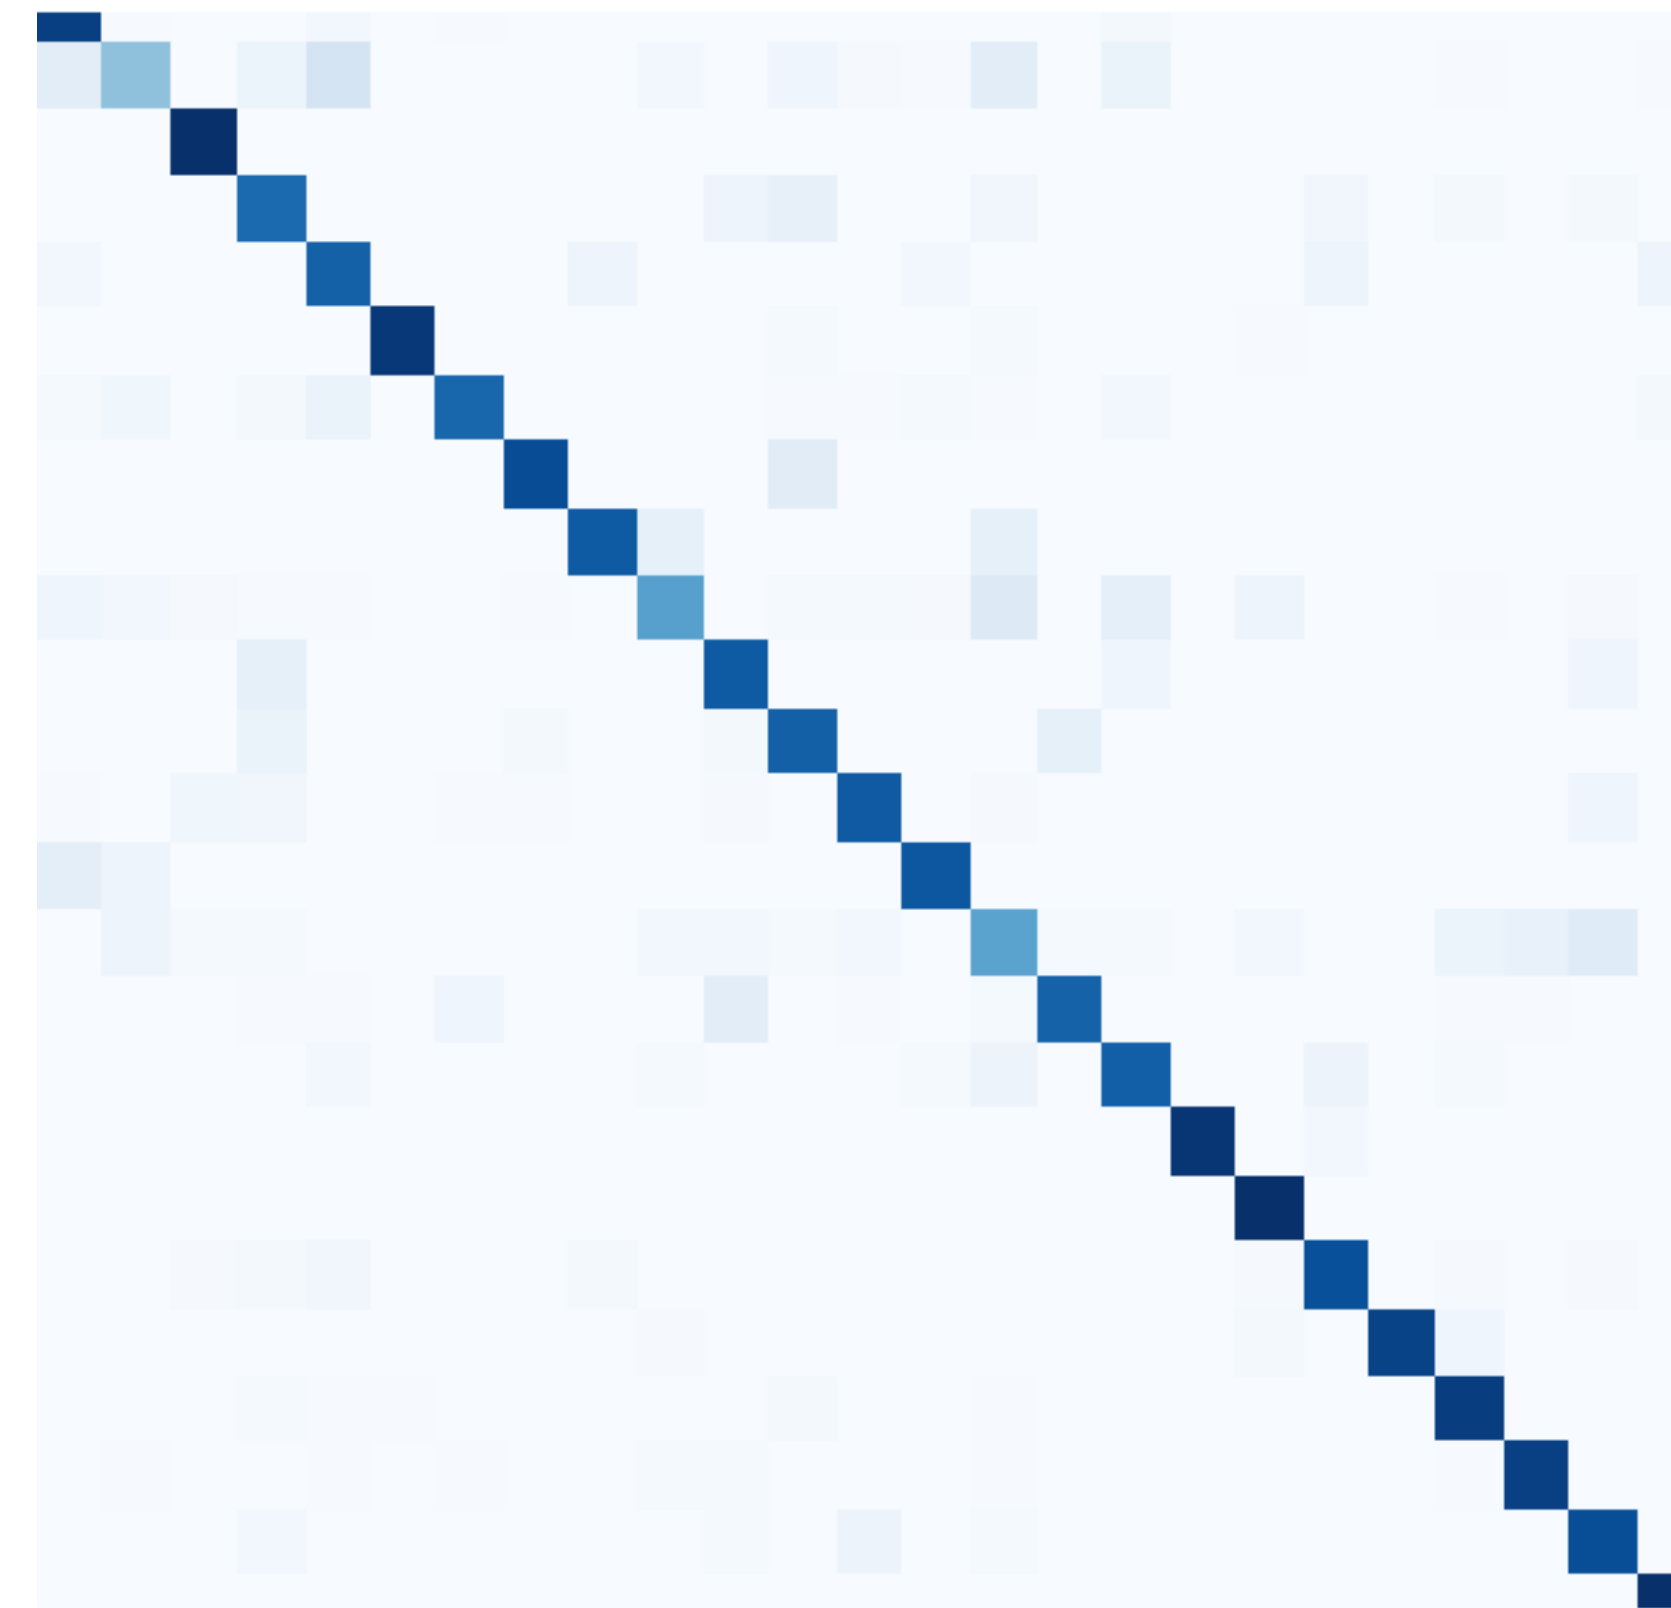

Multi-View CNN

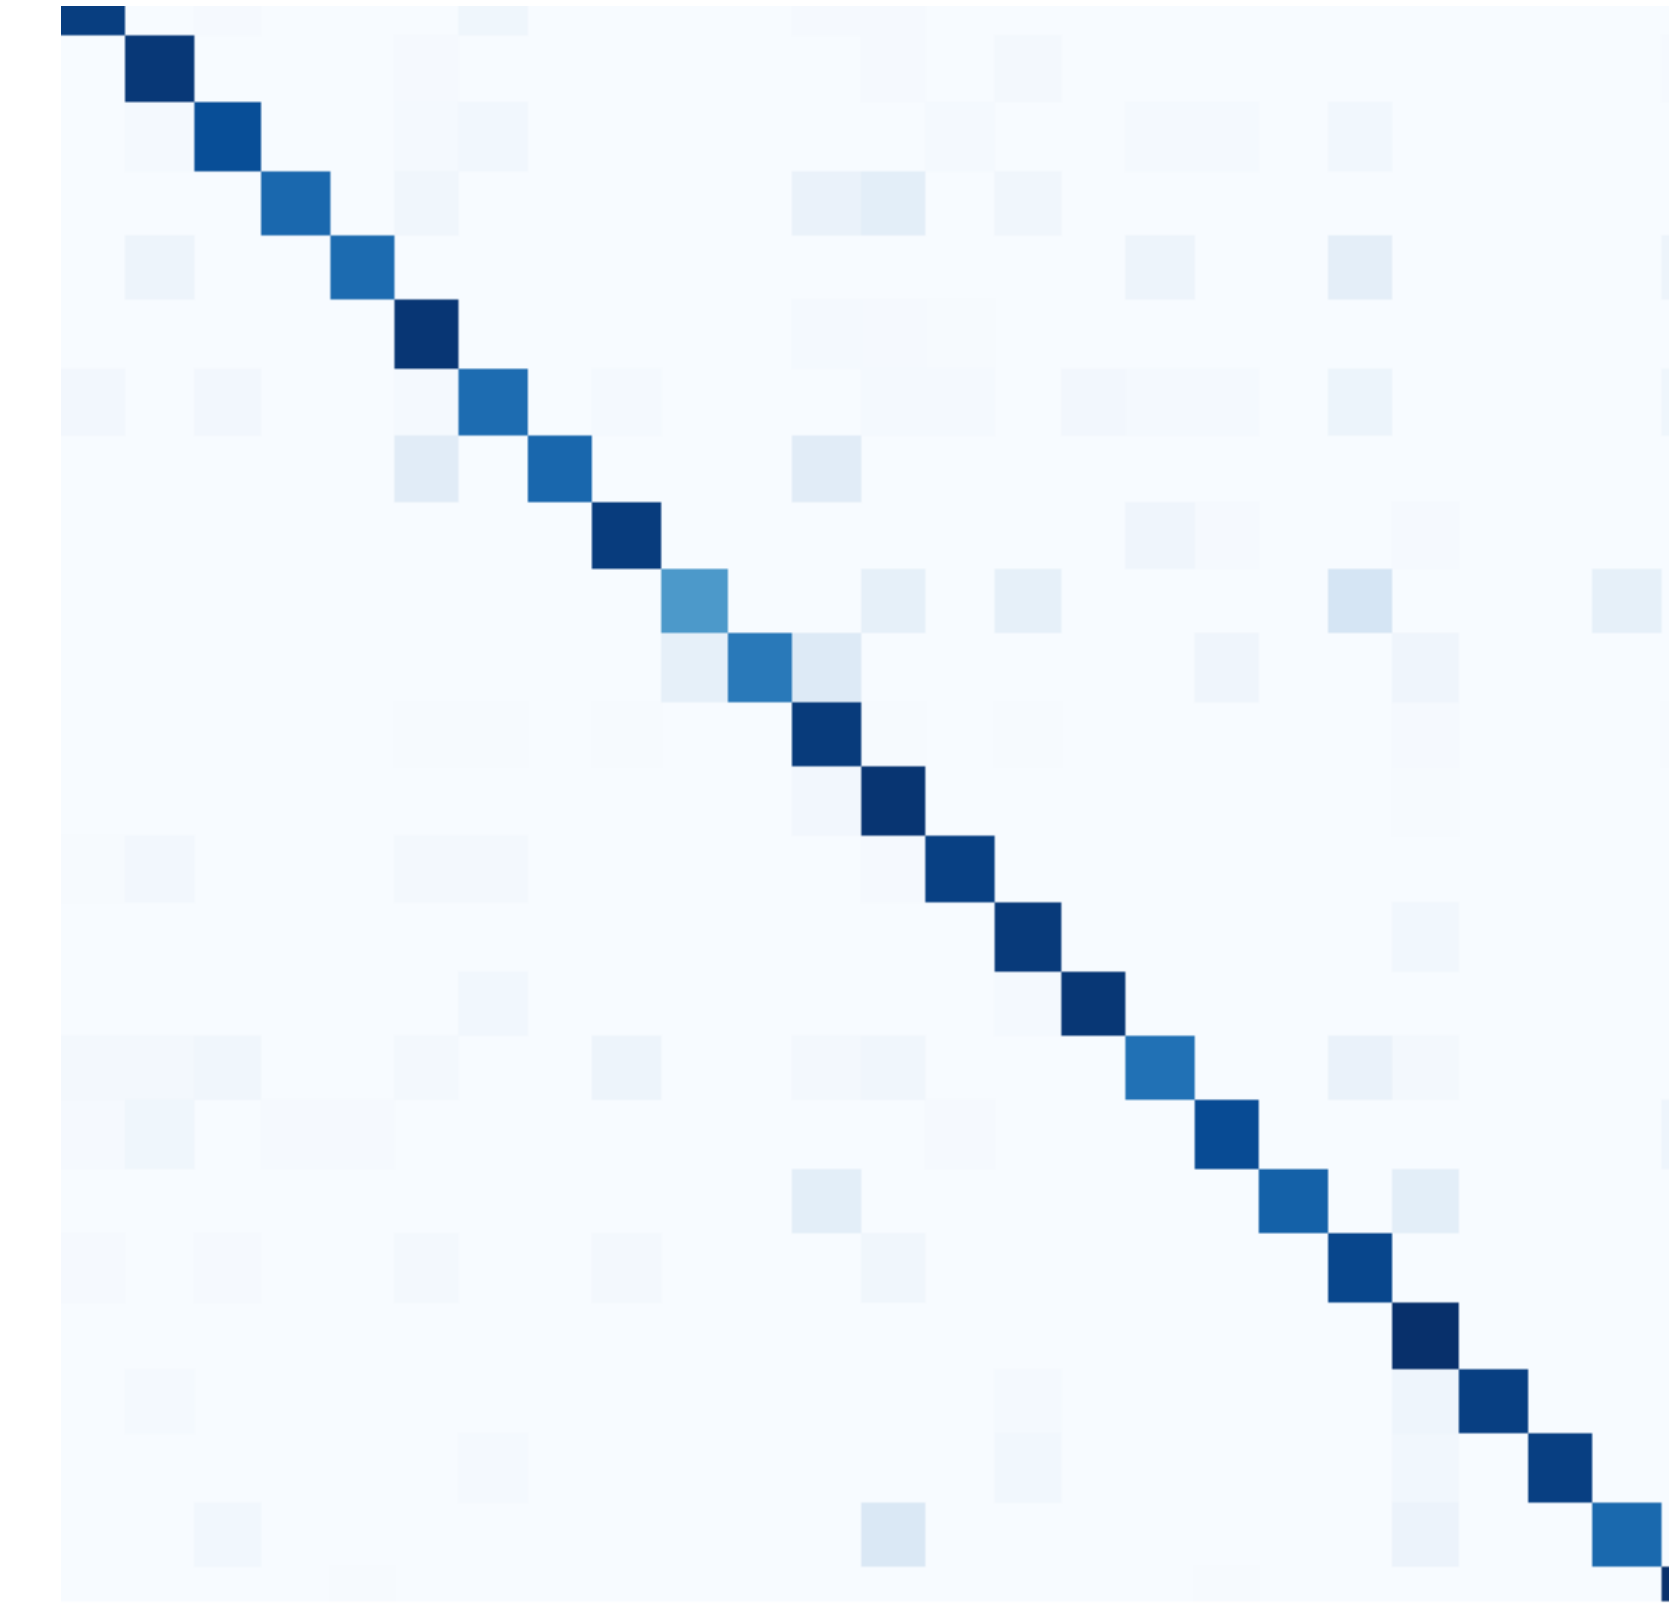

PointCNN

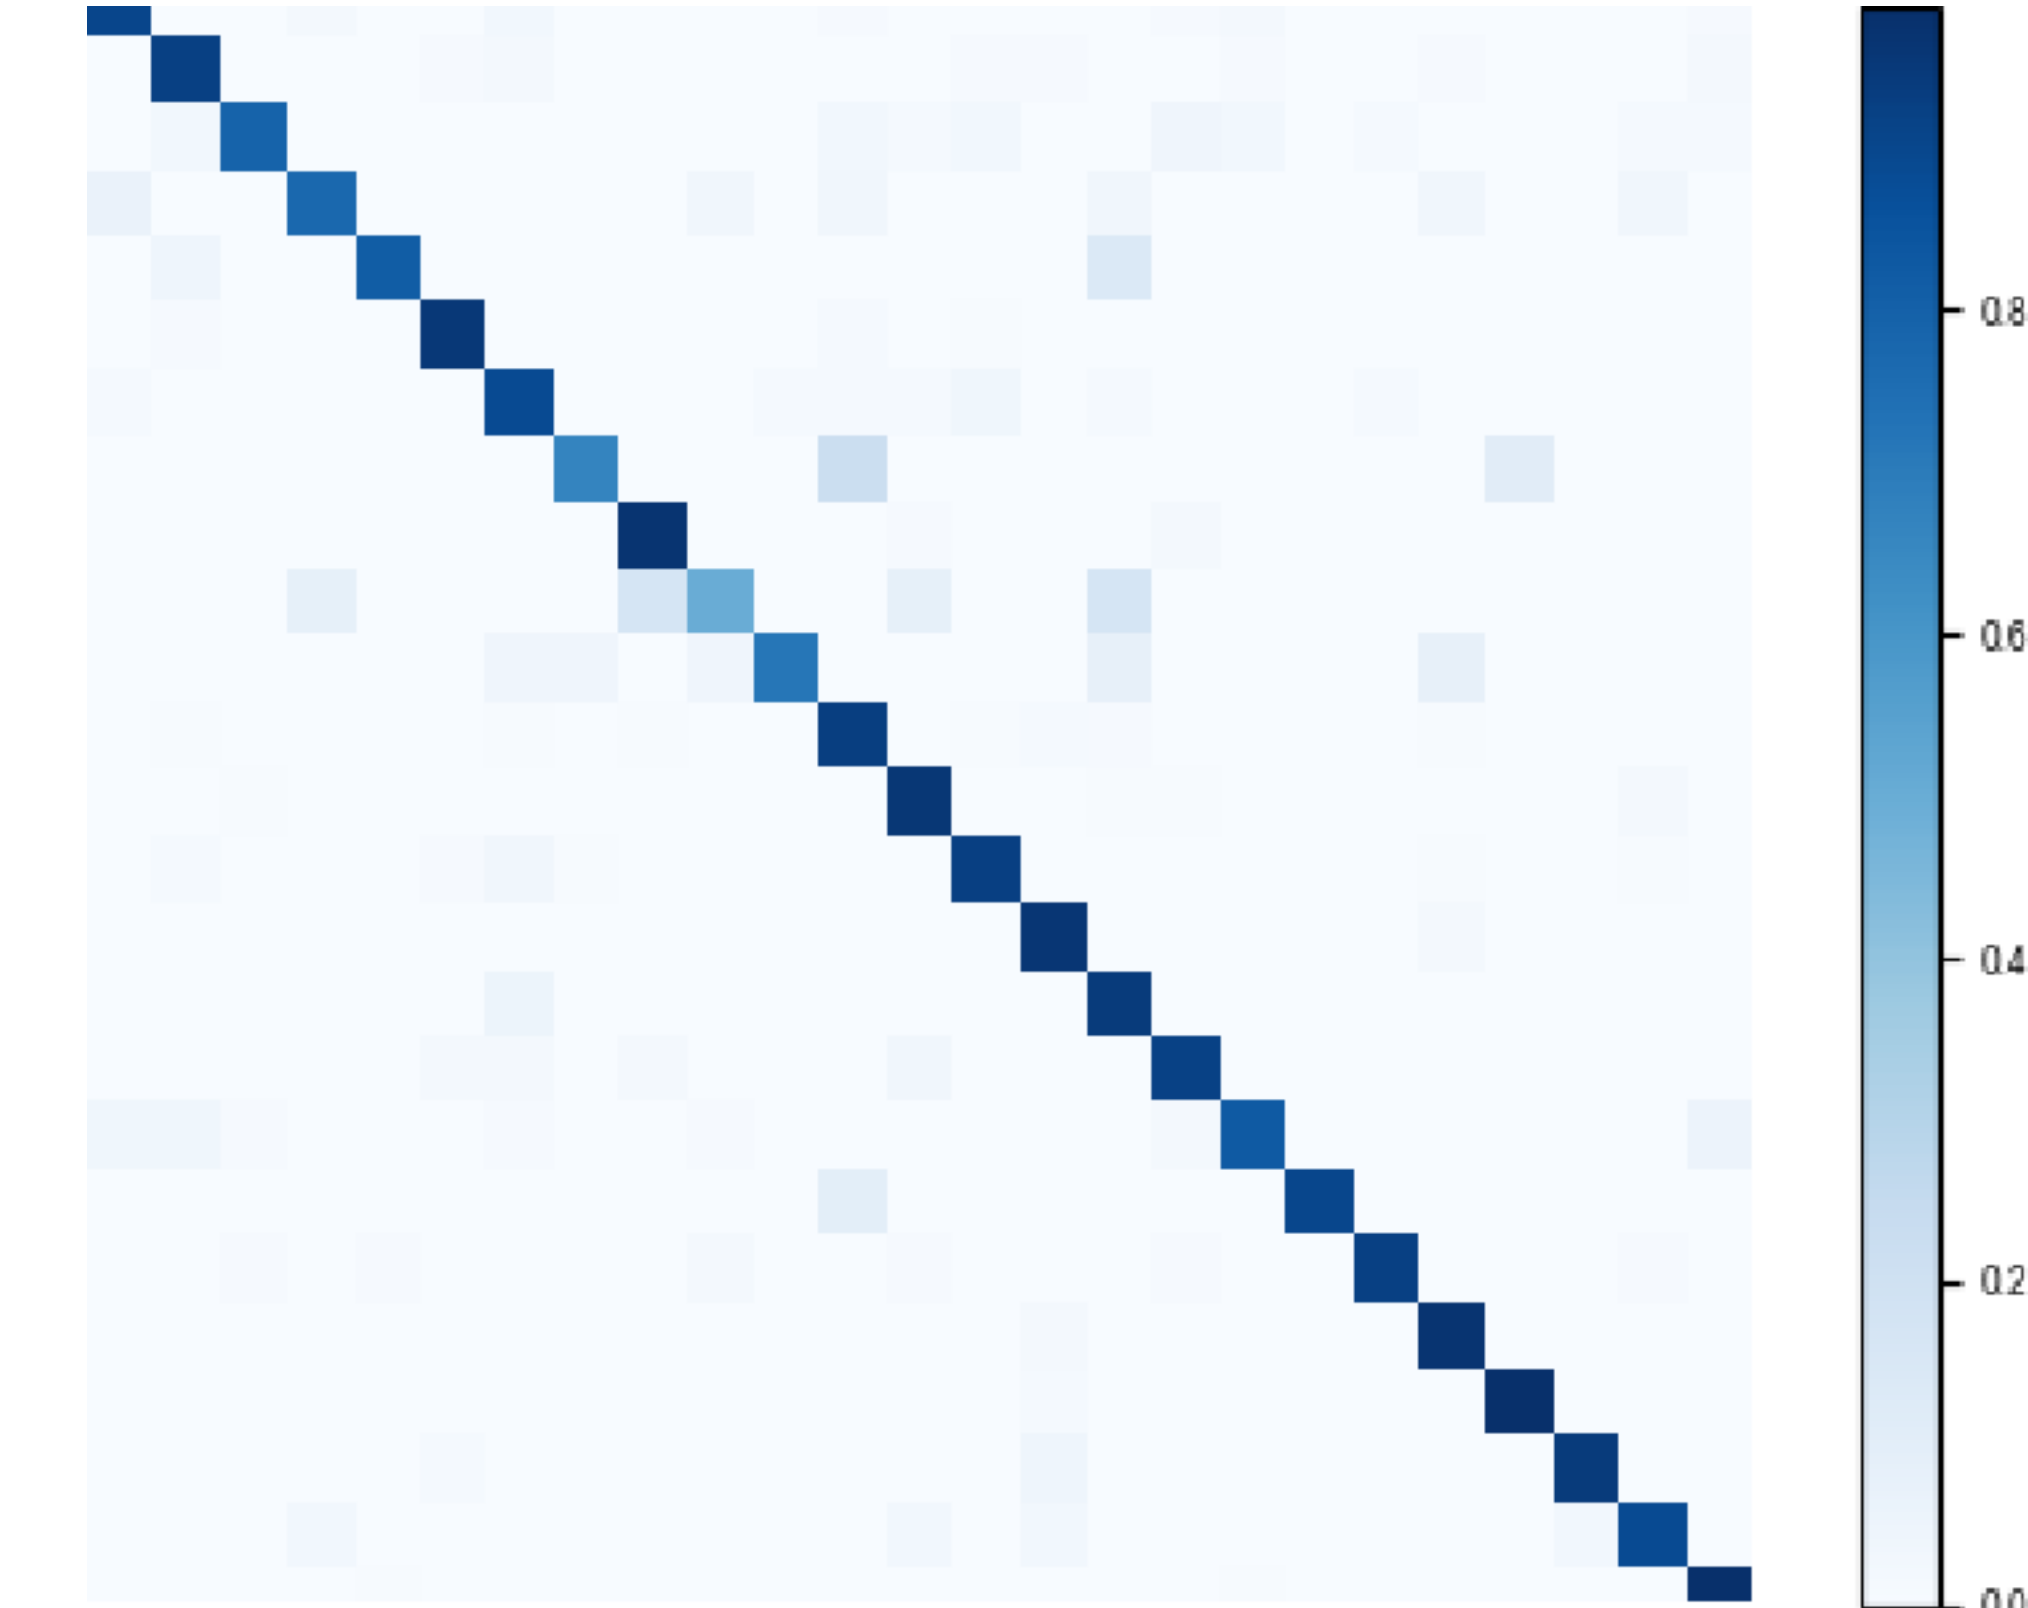

PointNet++

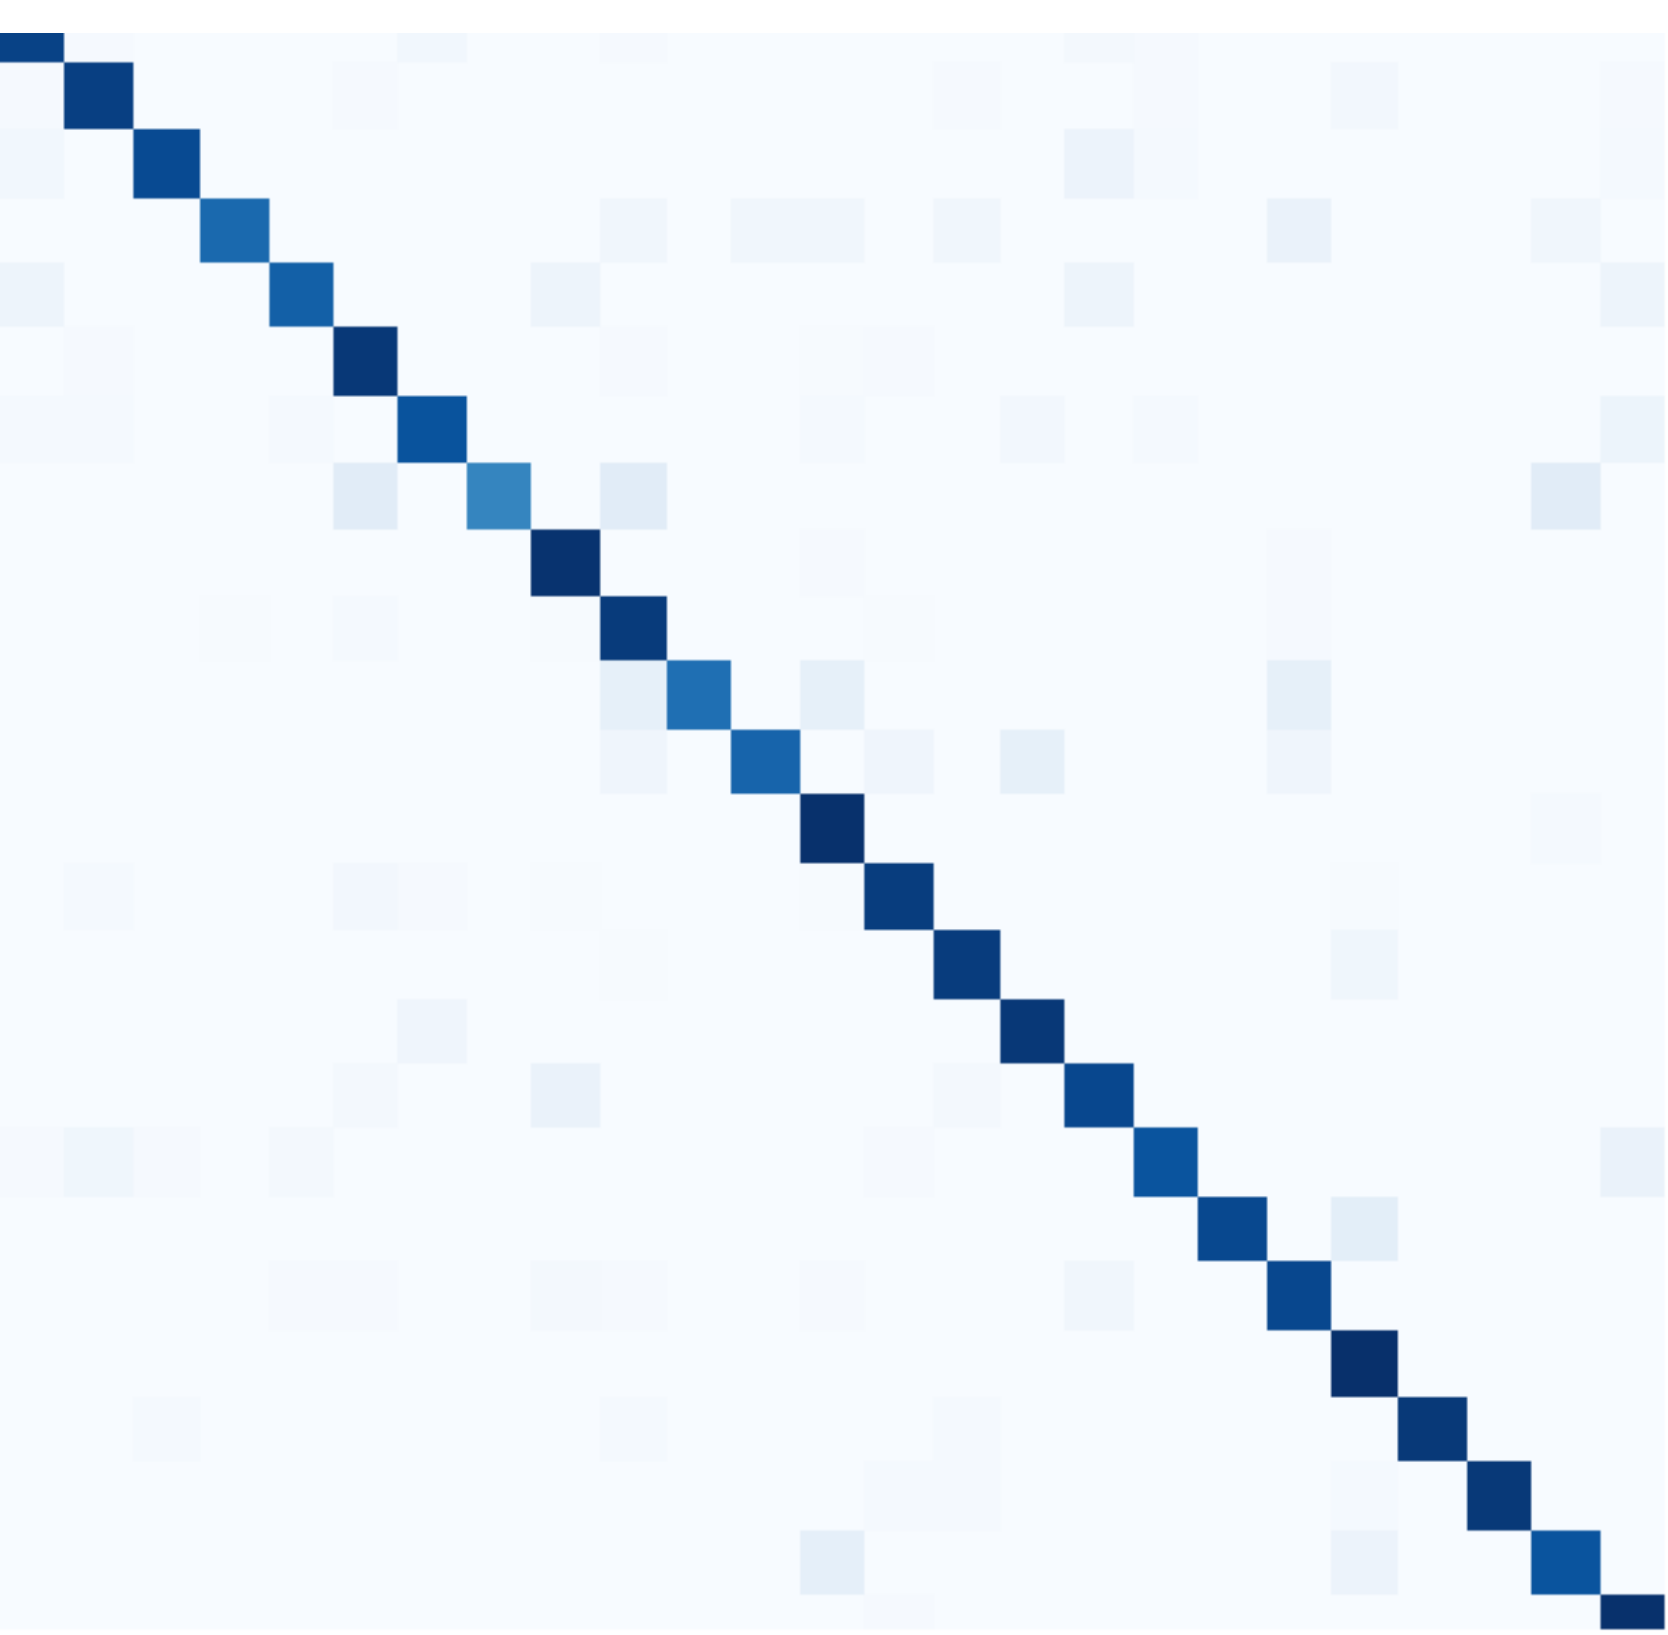

RotationNet

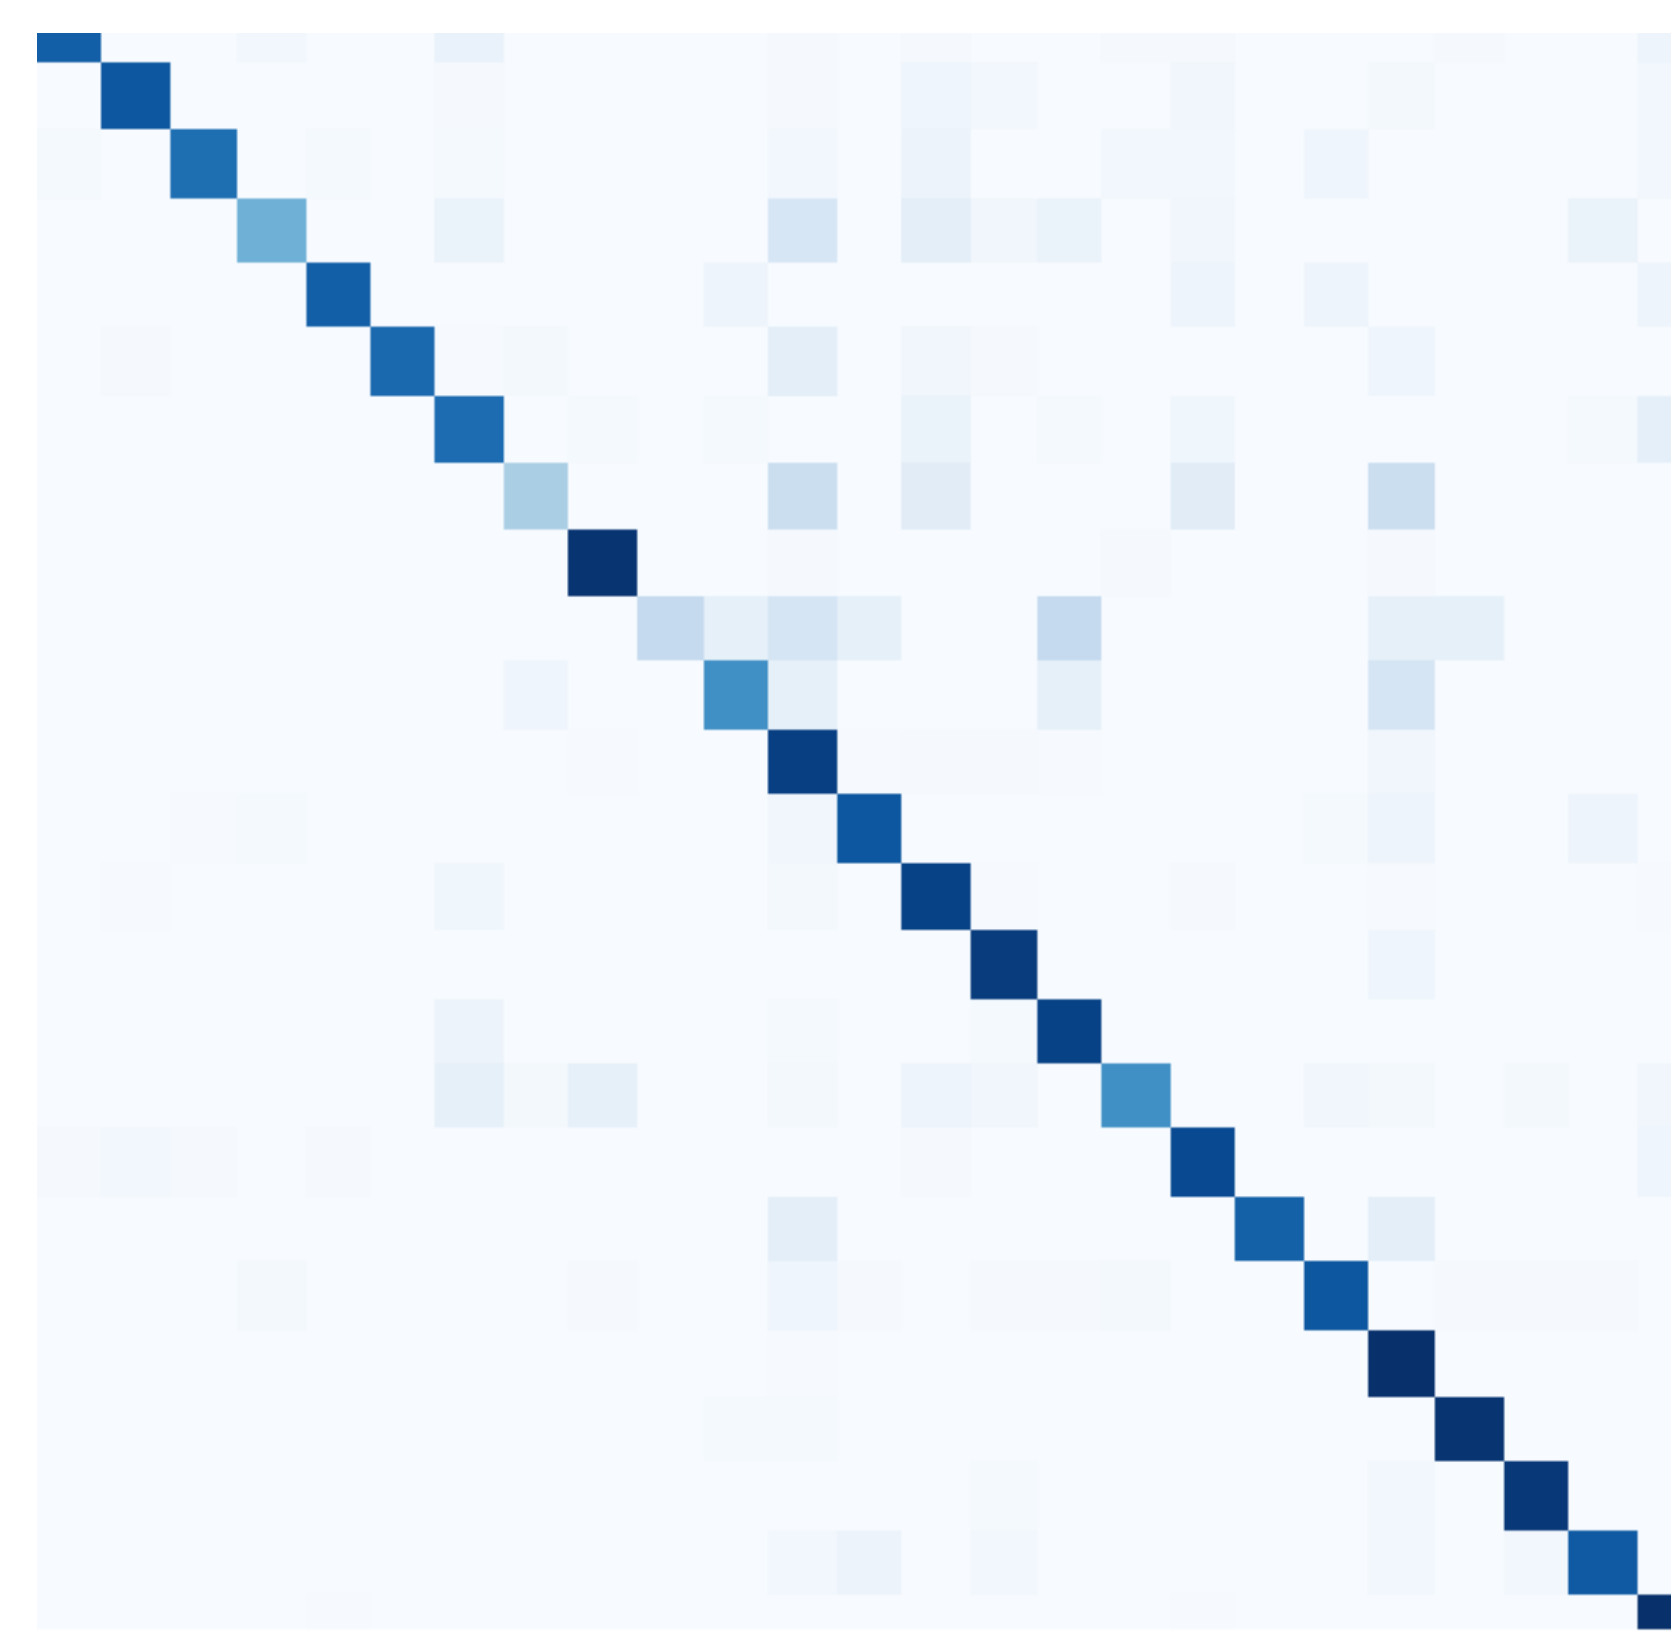

SpiderNet

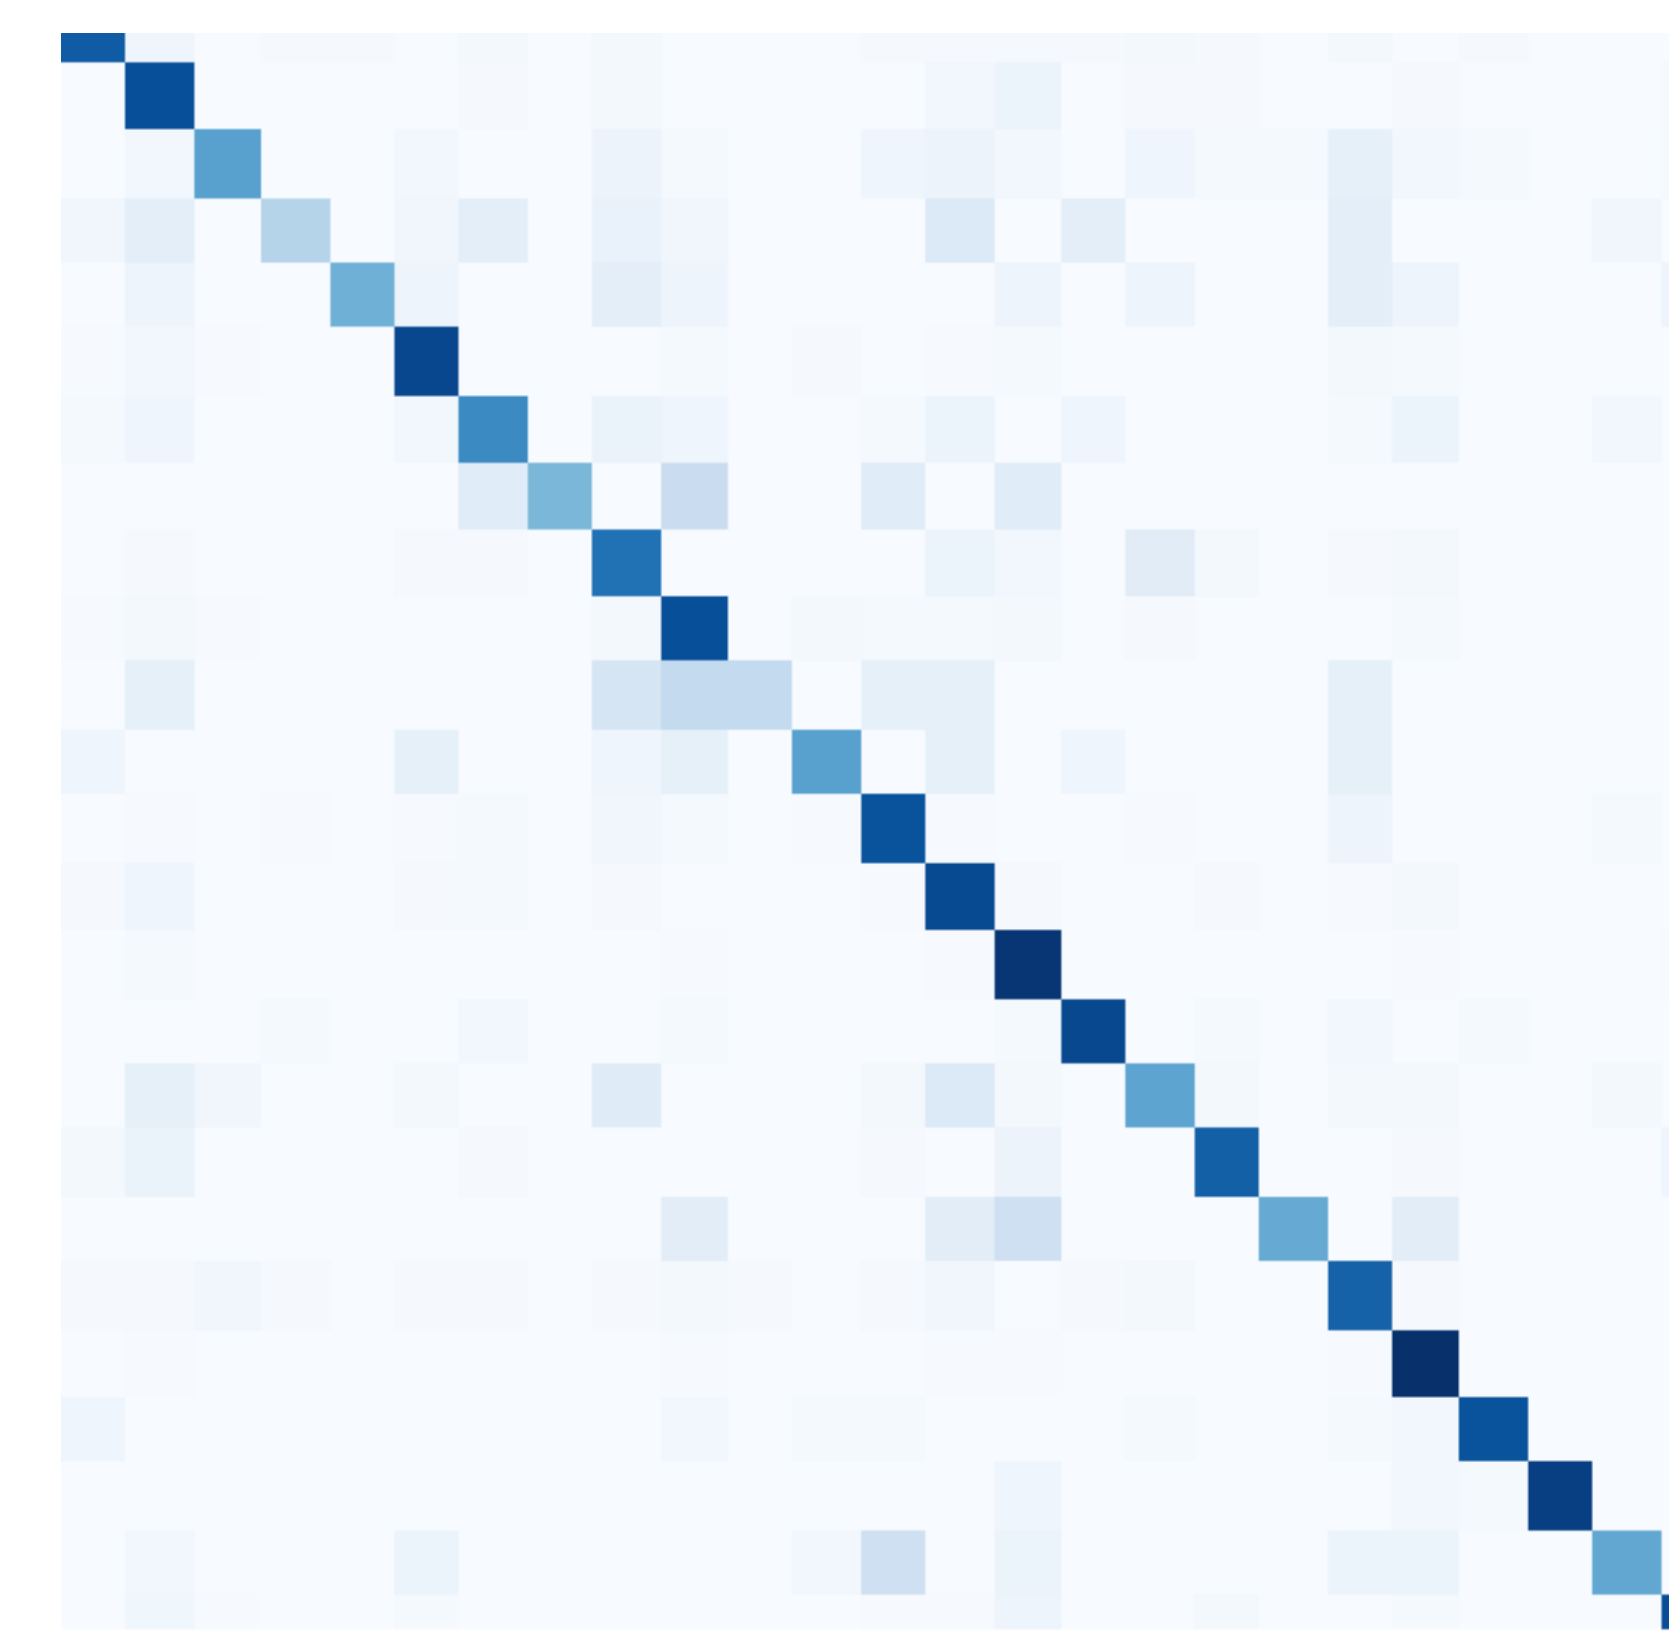

VRN

Supplement: Supplementary file 7 [file 123630171-supp.zip]

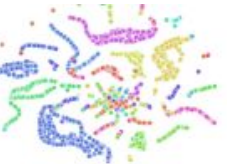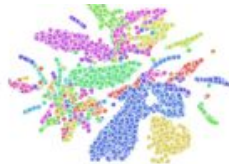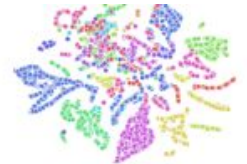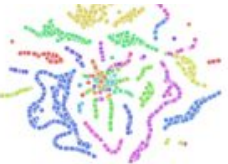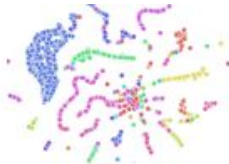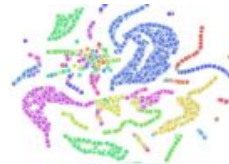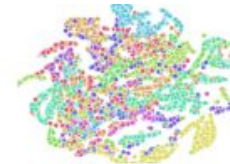

PointCNN

PointNet++

SpiderCNN

MVCNN

RotationNet

DLAN

VRN

Supplement: Supplementary file 12 [file 123630171-supp.zip]

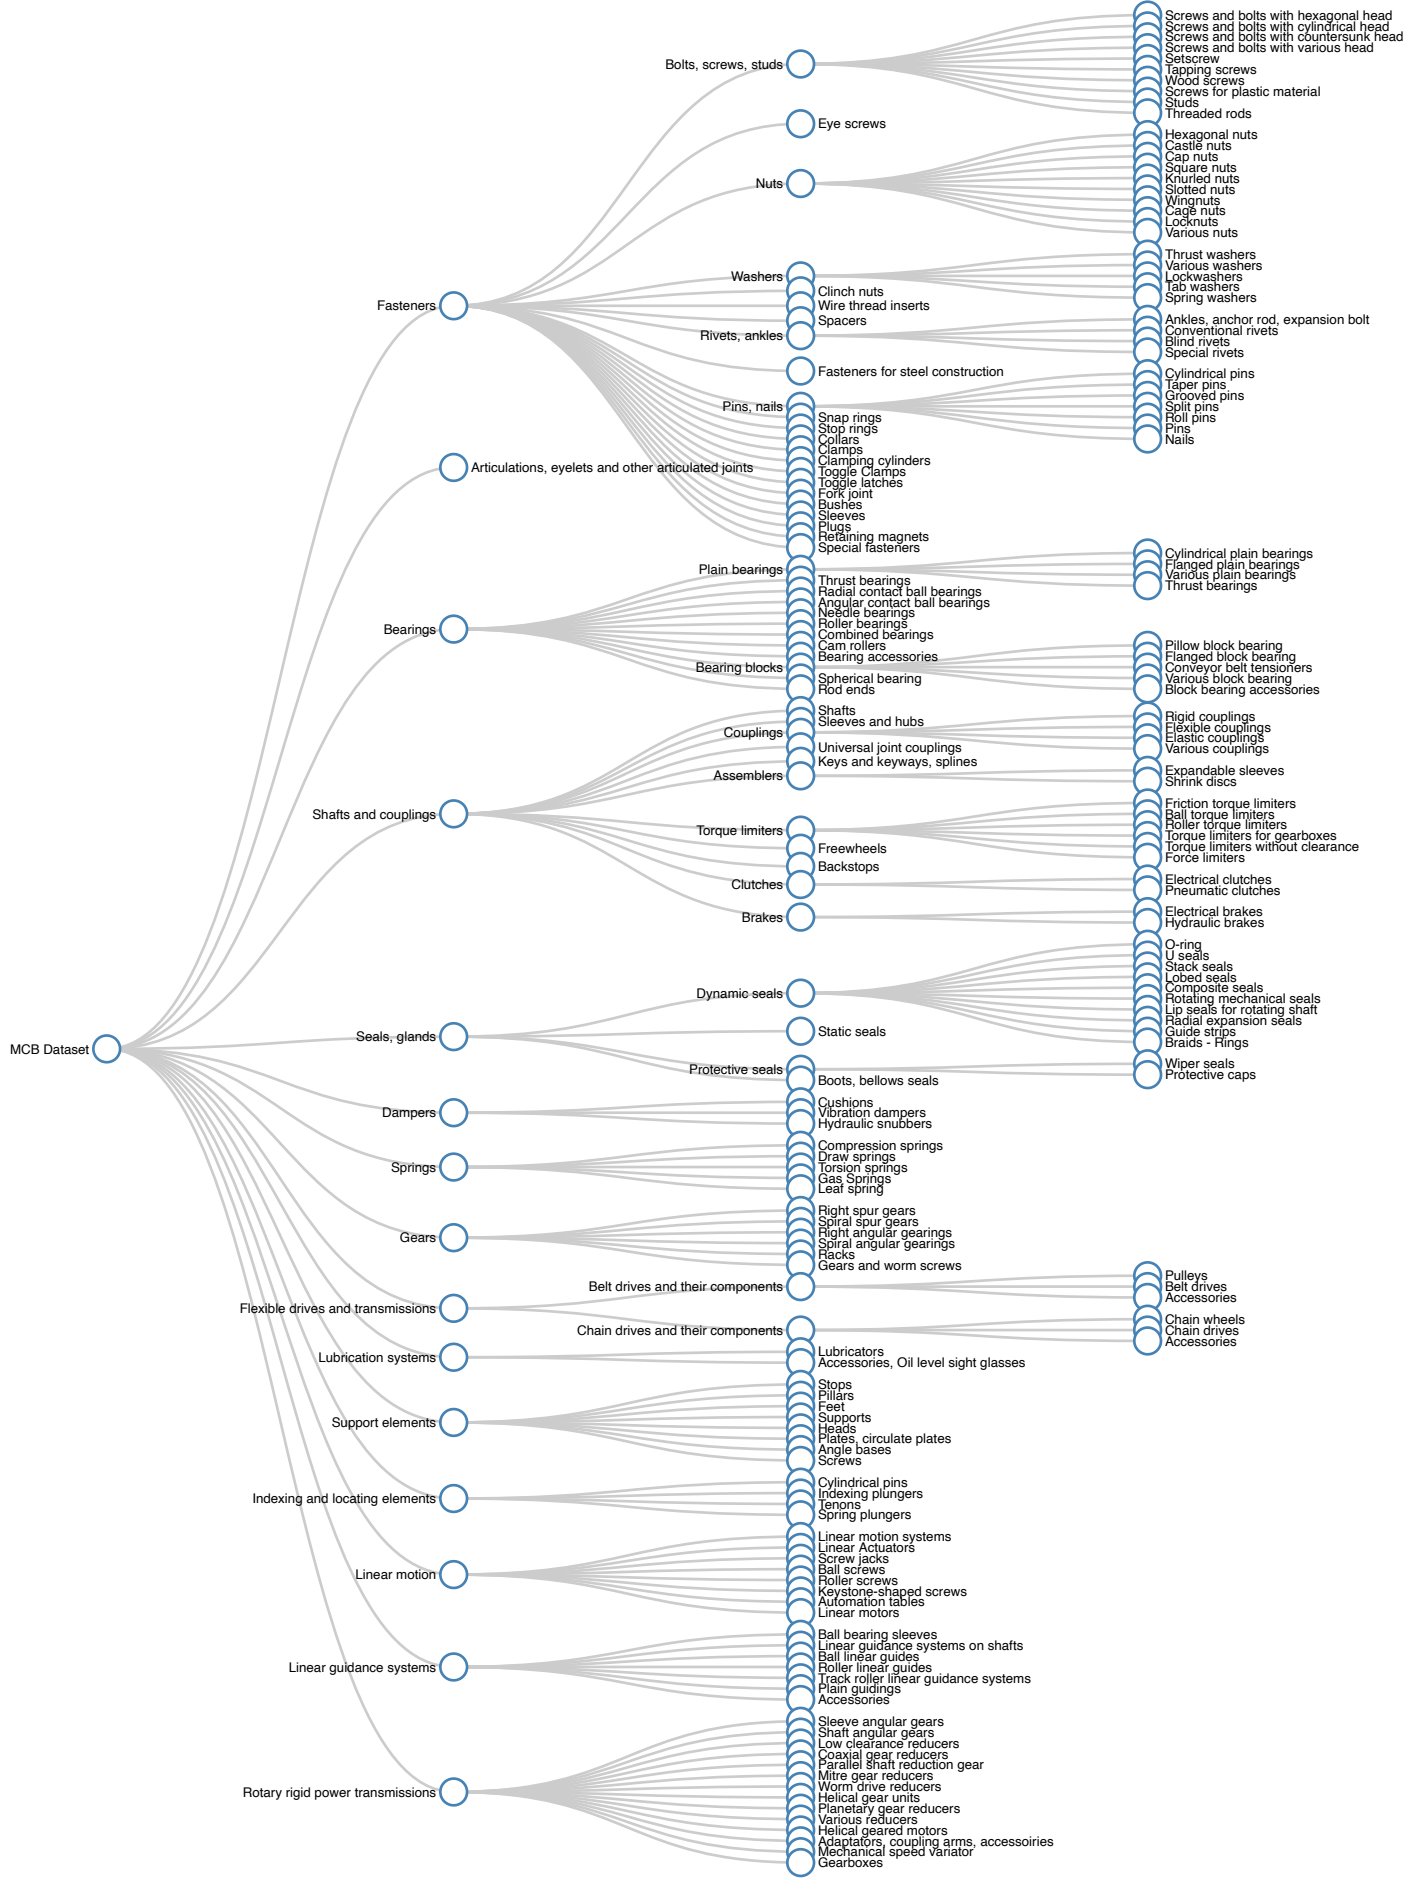

Supplement: Supplementary file 15 [file 123630171-supp.zip]

Dataset C

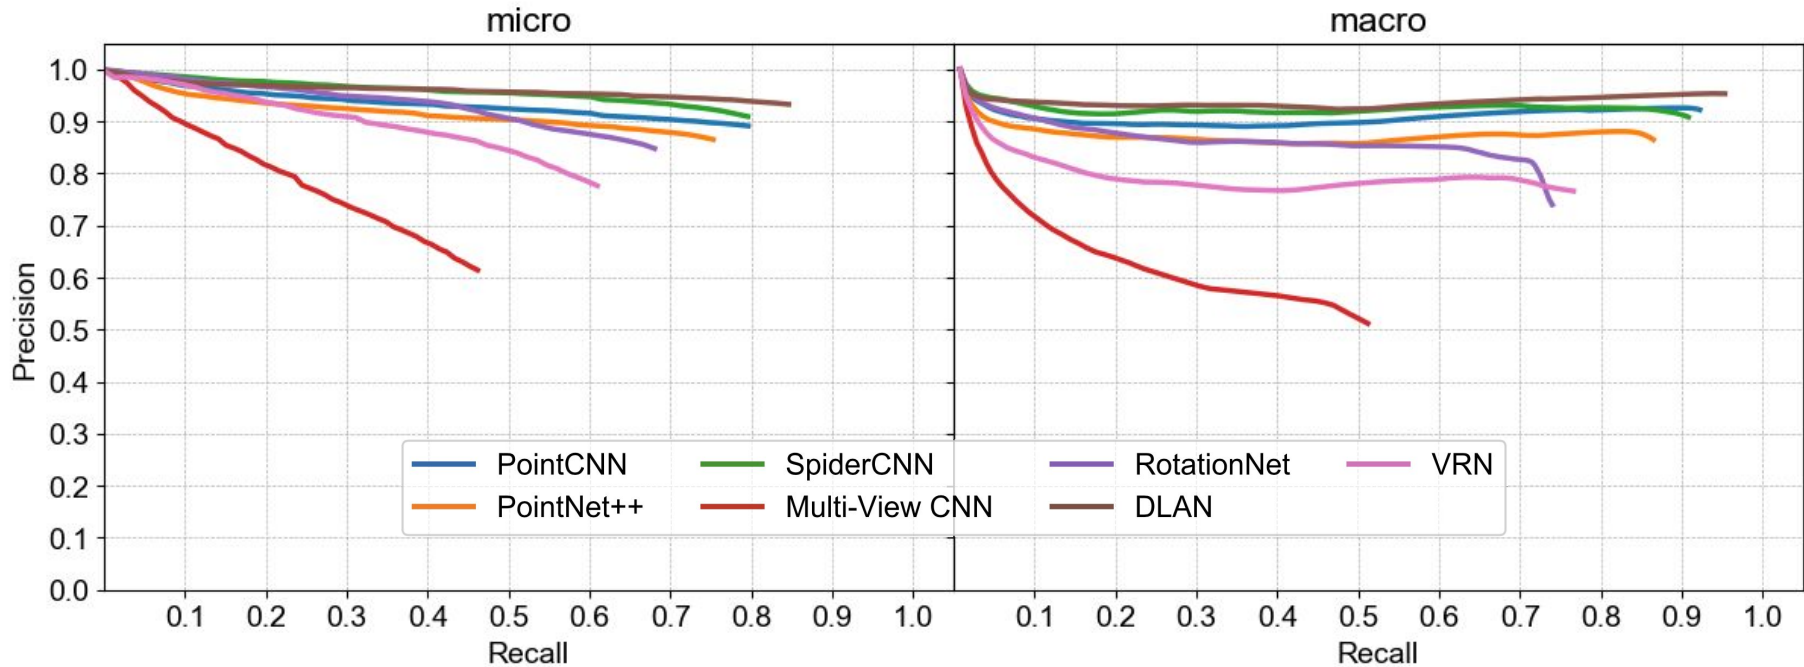

Supplement: Supplementary file 17 [file 123630171-supp.zip]
